# Supplementary material
Source: PubMed Central journal article supplement (PMC3465525)

## Supporting Information

---

| <b>Content</b>                                                                                     | <b>Page</b> |
|----------------------------------------------------------------------------------------------------|-------------|
| <b>General</b>                                                                                     | 2           |
| <b>General Procedure A: Synthesis of <i>o</i>-Azidoarylalkynes</b>                                 | 2           |
| <b>General Procedures B: Reaction of <i>o</i>-Azidoarylalkyne Substrates 1 with Anisole</b>        | 6           |
| <b>General Procedure C: Synthesis of Indole Derivatives 5 by Using Different Carbonucleophiles</b> | 13          |
| <b>General Procedure D: Synthesis of 6 and 7</b>                                                   | 19          |
| <b><sup>1</sup>H and <sup>13</sup>C NMR Spectra</b>                                                | 22          |

---

**General** Ethyl acetate (ACS grade), hexanes (ACS grade), diethyl ether (ACS grade) and anhydrous 1, 2-dichloroethane (HPLC grade) were purchased from Fisher Scientific and used without further purification. Methylene chloride and tetrahydrofuran were purified using MBraun Solvent Purifier. Commercially available reagents were used without further purification. 1-Azido-2-iodo-benzene and 1-Azido-2-ethynyl-benzene was prepared according to known procedure<sup>1</sup>. Reactions were monitored by thin layer chromatography (TLC) using Sorbent Technologies' pre-coated silica gel plates. Flash column chromatography was performed over Sorbent Technologies' silica gel (230-400 mesh). <sup>1</sup>H NMR and <sup>13</sup>C NMR spectra were recorded on a Varian 500 MHz Unity plus spectrometer and a Varian 400 MHz spectrometer using residue solvent peaks as internal standards. Infrared spectra were recorded with a Perkin Elmer FT-IR spectrum 2000 spectrometer and are reported in reciprocal centimeter (cm<sup>-1</sup>). Mass spectra were recorded with Micromass QTOF2 Quadrupole/Time-of-Flight Tandem mass spectrometer using electron spray ionization or Waters GCT Premier Time-of-Flight mass spectrometer with a field ionization (FI) ion source.

**General procedure A: synthesis of *o*-azidoarylalkynes:**

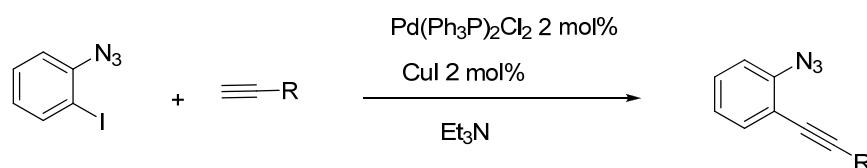

To a solution of 1-azido-2-iodobenzene (5 mmol), CuI (2 mol %), and Pd(PPh<sub>3</sub>)<sub>2</sub>Cl<sub>2</sub> (2 mol %) in triethylamine (100mL) was added drop-wise an alkyne (6 mmol) under N<sub>2</sub>. The reaction mixture was stirred for 5-10 h at room temperature. Upon completion, the mixture was diluted with diethyl ether and then washed with water and brine successively. The organic phase was dried with anhydrous MgSO<sub>4</sub>, filtered, and concentrated under *vacuum*. The residue was purified through silica gel flash chromatography to give the desired product in mostly > 90% yield.

**1-Azido-2-phenylethynylbenzene**

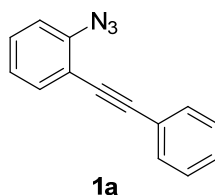

$^1\text{H}$  NMR (500 MHz,  $\text{CDCl}_3$ )  $\delta$  7.56 – 7.58 (m, 2H), 7.51 – 7.53 (m, 1H), 7.33 – 7.38 (m, 4H), 7.11 – 7.14 (m, 2H);  $^{13}\text{C}$  NMR (125 MHz,  $\text{CDCl}_3$ )  $\delta$  140.8, 133.6, 131.6, 129.5, 128.6, 128.3, 124.7, 122.9, 119.0, 115.6, 95.3, 84.9; IR (neat): 3063, 2917, 2127, 2092, 1599, 1569, 1495, 1481, 1442, 1302, 1293, 1262, 1088, 752, 711. MS ( $\text{FI}^+$ ): Calculated for  $[\text{C}_{14}\text{H}_9\text{N}_3]^+$ : 219.08; Found: 219.08.

### 1-Azido-2-hex-1-ynylbenzene

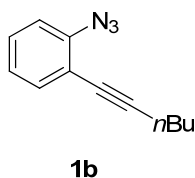

$^1\text{H}$  NMR (500 MHz,  $\text{CDCl}_3$ )  $\delta$  7.38 (dd,  $J = 7.5$  Hz, 1.5 Hz, 1H), 7.25 – 7.28 (m, 1H), 7.03 – 7.07 (m, 2H), 2.47 (t,  $J = 7.5$  Hz, 2H), 1.59 – 1.63 (m, 2H), 1.47 – 1.52 (m, 2H), 0.96 (t,  $J = 7.5$  Hz, 3H);  $^{13}\text{C}$  NMR (125 MHz,  $\text{CDCl}_3$ )  $\delta$  140.6, 133.7, 128.7, 124.5, 118.7, 116.3, 96.9, 76.2, 30.7, 22.0, 19.4, 13.6; IR (neat): 2957, 2930, 2871, 2127, 2092, 1487, 1438, 1302, 748. MS ( $\text{FI}^+$ ): Calculated for  $[\text{C}_{12}\text{H}_{13}\text{N}_3]^+$ : 199.11; Found: 199.11.

### 1-Azido-2-(4-phenyl-but-1-ynyl)benzene

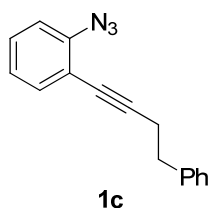

$^1\text{H}$  NMR (400 MHz,  $\text{CDCl}_3$ )  $\delta$  7.08 – 7.37 (m, 7H), 7.04 – 7.09 (m, 2H), 2.96 (t,  $J = 7.6$  Hz, 2H), 2.77 (t,  $J = 7.6$  Hz, 2H);  $^{13}\text{C}$  NMR (100 MHz,  $\text{CDCl}_3$ )  $\delta$  140.6, 140.5, 133.7, 128.9, 128.5, 128.4, 126.3, 124.5, 118.6, 115.9, 95.8, 76.7, 35.0, 21.9; IR (neat): 3062, 3027, 2926, 2127, 2094, 1569, 1488, 1453, 1439, 1301, 750. MS ( $\text{FI}^+$ ): Calculated for  $[\text{C}_{16}\text{H}_{13}\text{N}_3]^+$ : 247.11; Found: 247.11.

### 1-Azido-2-(3-benzyloxy-prop-1-ynyl)benzene

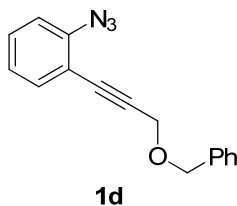

$^1\text{H}$  NMR (500 MHz,  $\text{CDCl}_3$ )  $\delta$  7.30 – 7.46 (m, 7H), 7.08 – 7.14 (m, 2H), 4.71 (s, 2H), 4.45 (s, 2H);  $^{13}\text{C}$  NMR (125 MHz,  $\text{CDCl}_3$ )  $\delta$  141.2, 137.4, 133.8, 129.7, 128.4, 128.2, 127.9, 124.6, 118.6, 114.8, 91.1, 82.1, 71.6, 57.9; IR (neat): 3741, 2849, 2130, 2096, 1488, 1441, 1306, 1093, 1073, 752; MS ( $\text{FI}^+$ ): Calculated for  $[\text{C}_{16}\text{H}_{13}\text{N}_3]^+$ : 263.11; Found: 263.10.

### 1-Azido-2-cyclopropylethynylbenzene

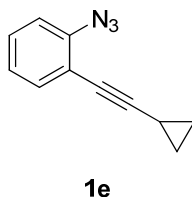

$^1\text{H}$  NMR (400 MHz,  $\text{CDCl}_3$ )  $\delta$  7.35 (d,  $J = 7.9$  Hz, 1H), 7.24 – 7.28 (m, 2H), 7.02 – 7.06 (m, 2H), 1.47 – 1.54 (m, 1H), 0.83 – 0.93 (m, 4H);  $^{13}\text{C}$  NMR (100 MHz,  $\text{CDCl}_3$ )  $\delta$  140.6, 133.7, 128.6, 124.5, 118.7, 116.1, 99.8, 71.2, 8.8, 0.4. IR (neat): 3013, 2229, 2125, 2094, 1489, 1445, 1299, 954, 751; MS ( $\text{FI}^+$ ): Calculated for  $[\text{C}_{11}\text{H}_9\text{N}_3]^+$ : 183.08; Found: 183.07.

### 1-Azido-2-cyclopentylethynylbenzene

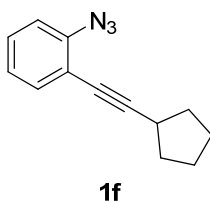

$^1\text{H}$  NMR (400 MHz,  $\text{CDCl}_3$ )  $\delta$  7.37 (d,  $J = 7.6$  Hz, 1H), 7.25 (t,  $J = 7.6$  Hz, 1H), 7.02 – 7.06 (m, 2H), 2.89 (quint,  $J = 7.4$  Hz, 1H), 1.98 – 2.07 (m, 2H), 1.72 – 1.82 (m, 4H), 1.57 – 1.66 (m, 2H);  $^{13}\text{C}$  NMR (100 MHz,  $\text{CDCl}_3$ )  $\delta$  140.3, 133.6, 128.5, 124.4, 118.7, 116.3, 101.0, 75.5, 33.6, 30.9, 25.0. IR (neat): 2959, 2869, 2125, 2097, 1488, 1445, 1298, 749. MS ( $\text{FI}^+$ ): Calculated for  $[\text{C}_{13}\text{H}_{13}\text{N}_3]^+$ : 211.11; Found: 211.11.

### 1-Azido-2-cyclohexylethynylbenzene

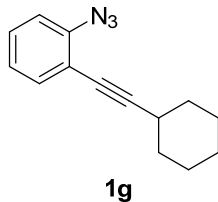

$^1\text{H}$  NMR (600 MHz,  $\text{CDCl}_3$ )  $\delta$  7.38 (dd, 1H,  $J = 7.8$  Hz, 1.8 Hz), 7.23 (td, 1H,  $J = 8.1$  Hz, 1.2 Hz), 7.03 – 7.07 (m, 2H), 2.65 (quint,  $J = 4.6$  Hz, 1H), 1.89 – 1.91 (m, 2H), 1.75 – 1.80 (m, 2H), 1.56 – 1.60 (m, 2H), 1.33 – 1.40 (m, 2H);  $^{13}\text{C}$  NMR (150 MHz,  $\text{CDCl}_3$ )  $\delta$  140.6, 133.9, 128.7, 124.6, 118.9, 116.5, 101.1, 76.1, 32.6, 30.0, 26.0, 25.0. IR (neat): 2930, 2853, 2125, 2099, 1487, 1446, 1294, 748. MS ( $\text{FI}^+$ ): Calculated for  $[\text{C}_{14}\text{H}_{15}\text{N}_3]^+$ : 225.13; Found: 225.12.

### 1-Azido-2-(3,3-dimethyl-but-1-ynyl)benzene

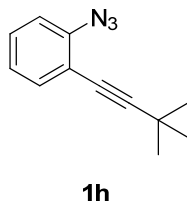

$^1\text{H}$  NMR (600 MHz,  $\text{CDCl}_3$ )  $\delta$  7.37 (dd,  $J = 7.8$  Hz, 1.8 Hz, 1H), 7.25 (td,  $J = 7.8$  Hz, 1.2 Hz, 1H), 7.03 – 7.06 (m, 2H), 1.34 (s, 9H);  $^{13}\text{C}$  NMR (150 MHz,  $\text{CDCl}_3$ )  $\delta$  140.4, 133.8, 128.7, 124.6, 119.2, 116.6, 105.2, 74.6, 30.9, 28.4. IR (neat): 2969, 2128, 2104, 1571, 1489, 1474, 1446, 1362, 1297, 1264, 751. MS ( $\text{FI}^+$ ): Calculated for  $[\text{C}_{12}\text{H}_{13}\text{N}_3]^+$ : 199.11; Found: 199.11.

### 1-azido-2-((4-methoxyphenyl)ethynyl)benzene

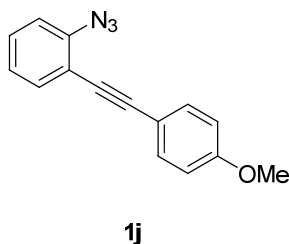

$^1\text{H}$  NMR (400 MHz,  $\text{CDCl}_3$ )  $\delta$  7.48 – 7.52 (m, 3H), 7.29 – 7.34 (m, 1H), 7.09 – 7.13 (m, 2H), 6.87 – 6.90 (m, 2H), 3.83 (s, 3H);  $^{13}\text{C}$  NMR (125 MHz,  $\text{CDCl}_3$ )  $\delta$  159.9, 140.5, 133.5, 133.1, 129.2, 124.7, 118.9, 115.9, 114.9, 114.0, 95.5, 83.6, 55.3; IR (neat): 2916, 2837, 2216, 2129,

2100, 1606, 1511, 1485, 1439, 1304, 1250, 1174, 1026, 834, 751; (ES<sup>+</sup>) Calculated for [C<sub>15</sub>H<sub>12</sub>N<sub>3</sub>NaO]<sup>+</sup>: 272.08; Found: 272.08.

#### 4-(2-Azido-phenylethynyl)benzoic acid methyl ester

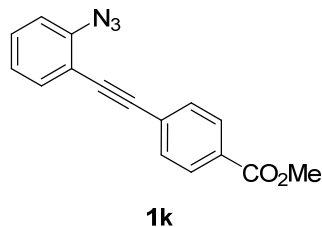

<sup>1</sup>H NMR (500 MHz, CDCl<sub>3</sub>) δ 8.02 – 8.04 (m, 2H), 7.61 – 7.63 (m, 2H), 7.51 – 7.53 (m, 1H), 7.36 – 7.39 (m, 1H), 7.12 – 7.16 (m, 2H), 3.93 (s, 3H); <sup>13</sup>C NMR (125 MHz, CDCl<sub>3</sub>) δ 166.5, 141.1, 133.7, 131.5, 130.0, 129.7, 129.5, 127.6, 124.7, 118.9, 114.9, 94.4, 87.8, 52.2; IR (neat): 2951, 2342, 2127, 2088, 1724, 1484, 1434, 1277, 1192, 1175, 1104, 1095, 854, 765, 753; MS (ES<sup>+</sup>) Calculated for [C<sub>16</sub>H<sub>11</sub>KN<sub>3</sub>O<sub>2</sub>]<sup>+</sup>: 316.05; Found: 316.05.

#### 2-Azido-1-hex-1-ynyl-3, 5-dimethyl-benzene 1l

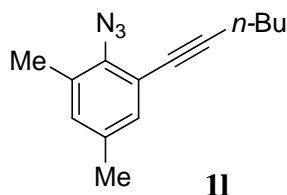

<sup>1</sup>H NMR (400 MHz, CDCl<sub>3</sub>) δ 7.02 (s, 1H), 6.88 (s, 1H), 2.46 (t, *J* = 7.2 Hz, 2H), 2.23 (s, 3H), 2.21 (s, 3H), 1.58 – 1.85 (m, 2H), 1.46 – 1.53 (m, 2H), 0.95 (t, *J* = 7.2 Hz, 3H); <sup>13</sup>C NMR (100 MHz, CDCl<sub>3</sub>) δ 135.3, 134.3, 131.6, 131.2, 130.9, 118.0, 98.0, 75.9, 30.4, 30.3, 22.1, 20.5, 19.4, 18.0, 13.6. IR (neat): 2958, 2932, 2121, 1469, 1428, 1230, 857, 728; MS: MS (FI<sup>+</sup>): Calculated for [C<sub>14</sub>H<sub>17</sub>N<sub>3</sub>]<sup>+</sup>: 227.14; Found: 227.14.

#### 1-Azido-3, 5-dichloro-2-hex-1-ynylbenzene

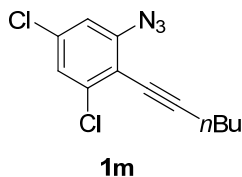

$^1\text{H}$  NMR (400 MHz,  $\text{CDCl}_3$ )  $\delta$  7.19(d,  $J = 2.0\text{Hz}$ , 1H), 6.97 (d,  $J = 2.0\text{Hz}$ , 1H), 2.53 (t,  $J = 7.2$  Hz, 2H), 1.60 – 1.66 (m, 2H), 1.51 – 1.54 (m, 2H), 0.96 (t,  $J = 7.2$  Hz, 3H);  $^{13}\text{C}$  NMR (125 MHz,  $\text{CDCl}_3$ )  $\delta$  143.1, 138.1, 133.7, 125.4, 117.4, 116.3, 104.0, 72.5, 30.4, 21.9, 19.6, 13.6; IR (neat): 3441, 2112, 1642, 1461, 1400, 1295, 912, 715; MS: MS ( $\text{FI}^+$ ): Calculated for  $[\text{C}_{12}\text{H}_{11}\text{Cl}_2\text{N}_3]^+$ : 267.03; Found: 267.03.

**General procedure B: the reaction of *o*-azidoarylalkyne substrate **1** with anisole:**

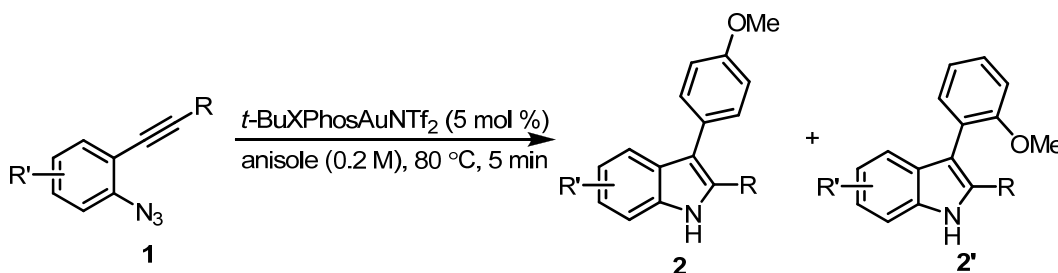

$t\text{-BuXPhosAuNTf}_2$  (13.8 mg, 0.015 mmol) was added to a solution of *o*-azidoarylalkyne **1** (0.30 mmol) in anisole (1.5 mL) at  $80^\circ\text{C}$ , and the progress of the reaction was monitored by TLC. The reaction typically took 5 mins. Upon completion, the mixture was concentrated and the residue was purified by chromatography on silica gel to afford the desired products **2** and **2'**.

**3-(4-Methoxy-phenyl)-2-phenyl-1*H*-indole**

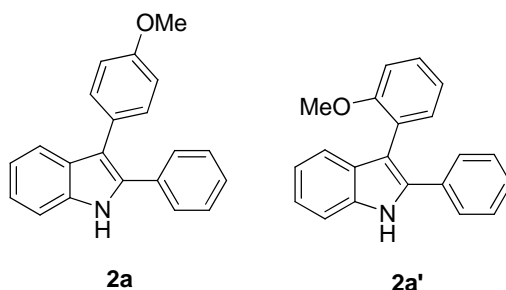

Yield of **2a+2a'**: 89% (**2a/ 2a'** = 6.5/1). Major isomer **2a**:  $^1\text{H}$  NMR (600 MHz,  $\text{CD}_3\text{COCD}_3$ )  $\delta$  10.6 (bs, 1H), 7.49 – 7.52 (m, 3H), 7.45 – 7.46 (m, 1H), 7.29 – 7.33 (m, 4H), 7.25 – 7.27 (m, 1H), 7.14 (t,  $J = 7.2$  Hz, 1H), 7.04 (t,  $J = 7.2$  Hz, 1H), 6.97 (d,  $J = 9.0$  Hz, 2H), 3.82 (s, 3H);  $^{13}\text{C}$  NMR (150 MHz,  $\text{CDCl}_3$ )  $\delta$  158.3, 136.5, 133.8, 133.1, 131.1, 128.9, 128.4, 128.2, 128.1, 127.8, 127.3, 122.1, 119.6, 118.9, 114.0, 111.2, 54.6; IR (neat): 3054, 2934, 2834, 1602, 1554, 1513, 1484, 1456, 1329, 1284, 1245, 1175, 1029, 968, 907, 840, 744; MS ( $\text{ES}^+$ ) Calculated for  $[\text{C}_{21}\text{H}_{17}\text{NNaO}]^+$ : 322.12; Found: 322.10.

### 2-Butyl-3-(4-methoxy-phenyl)-1H-indole

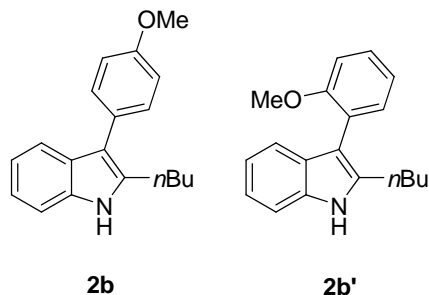

Yield of **2b+2b'**: 74% (**2b/ 2b'** = 7/1). Major isomer **2b**:  $^1\text{H}$  NMR (500 MHz,  $\text{CDCl}_3$ )  $\delta$  7.95 (bs, 1H), 7.64 (d, 1H,  $J = 8.0$  Hz), 7.45 (d, 2H,  $J = 9.0$  Hz), 7.35 (d, 1H,  $J = 8.0$  Hz), 7.20 (t, 1H,  $J = 7.5$  Hz), 7.14 (t, 1H,  $J = 7.5$  Hz), 7.05 (d, 2H,  $J = 9.0$  Hz), 3.90 (s, 3H), 2.85 (t, 2H,  $J = 7.8$  Hz), 1.69 (quint,  $J = 7.8$  Hz, 2H), 1.40 (sext,  $J = 7.5$  Hz, 2H), 0.93 (t,  $J = 7.5$  Hz, 3H);  $^{13}\text{C}$  NMR (125 MHz,  $\text{CDCl}_3$ )  $\delta$  157.9, 135.8, 135.2, 130.7, 128.2, 127.9, 121.4, 119.8, 118.9, 114.0, 113.9, 110.4, 55.3, 32.1, 26.1, 22.6, 13.9; IR (neat): 3404, 3056, 2955, 2930, 2870, 2834, 1611, 1561, 1510, 1448, 1330, 1282, 1174, 1036, 1019, 831, 744; MS ( $\text{ES}^+$ ) Calculated for  $[\text{C}_{19}\text{H}_{21}\text{NNaO}]^+$ : 302.15; Found: 302.15

### 3-(4-Methoxy-phenyl)-2-phenethyl-1H-indole

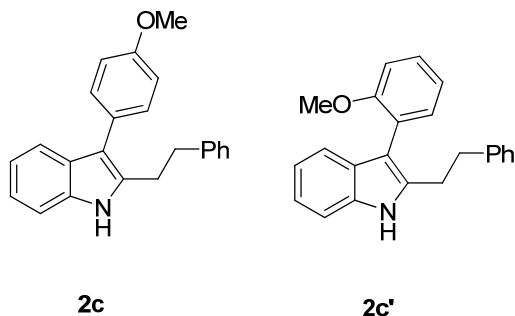

Yield of **2c+2c'**: 83% (**2c/ 2c'** = 5/1). Major isomer **2c**:  $^1\text{H}$  NMR (600 MHz,  $\text{CDCl}_3$ )  $\delta$  7.76 (bs, 1H), 7.60 (d,  $J = 7.8$  Hz, 1H), 7.34 – 7.36 (m, 2H), 7.29 – 7.31 (m, 3H), 7.23 – 7.25 (m, 1H), 7.16 – 7.19 (m, 3H), 7.10 – 7.13 (m, 1H), 7.00 – 7.02 (m, 2H), 3.89 (s, 3H), 3.16 (t,  $J = 7.8$  Hz, 2H), 3.00 (t,  $J = 7.8$  Hz, 2H);  $^{13}\text{C}$  NMR (150 MHz,  $\text{CDCl}_3$ )  $\delta$  158.0, 141.0, 135.1, 134.6, 130.6, 128.6, 128.4, 128.0, 127.6, 126.3, 121.6, 119.8, 118.9, 114.5, 114.0, 110.4, 55.3, 36.1, 28.3; IR (neat): 3403, 3026, 2930, 1611, 1562, 1510, 1459, 1331, 1284, 1244, 1174, 1021, 744; MS ( $\text{ES}^+$ ) Calculated for  $[\text{C}_{23}\text{H}_{21}\text{NNaO}]^+$ : 350.15; Found: 350.14.



## 2-Benzyloxymethyl-3-(4-methoxy-phenyl)-1H-indole

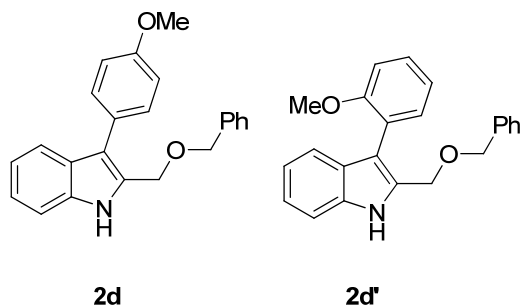

Yield of **2d+2d'**: 51% (**2d/ 2d'** = 5/1). Major isomer **2d**:  $^1\text{H}$  NMR (600 MHz,  $\text{CDCl}_3$ )  $\delta$  8.40 (bs, 1H), 7.69 (d,  $J = 7.8$  Hz, 1H), 7.41 – 7.37 (m, 3H), 7.36 – 7.28 (m, 5H), 7.23 (t,  $J = 7.8$  Hz, 1H), 7.14 (t,  $J = 7.8$  Hz, 1H), 7.00 (d,  $J = 9.0$  Hz, 2H), 4.78 (s, 2H), 4.54 (s, 2H), 3.88 (s, 3H);  $^{13}\text{C}$  NMR (150 MHz,  $\text{CDCl}_3$ )  $\delta$  158.0, 137.7, 135.6, 131.1, 130.5, 128.5, 128.0, 127.9, 127.5, 126.9, 122.4, 120.0, 119.5, 116.0, 114.0, 110.9, 72.3, 63.8, 55.3; IR (neat): 3400, 3030, 2932, 2835, 2537, 1691, 1610, 1564, 1509, 1454, 1329, 1284, 1246, 1176, 1068, 1027, 837, 746; MS ( $\text{ES}^+$ ) Calculated for  $[\text{C}_{23}\text{H}_{21}\text{NNaO}_2]^+$ : 366.15; Found: 366.14.

## 2-Cyclopropyl-3-(4-methoxy-phenyl)-1H-indole

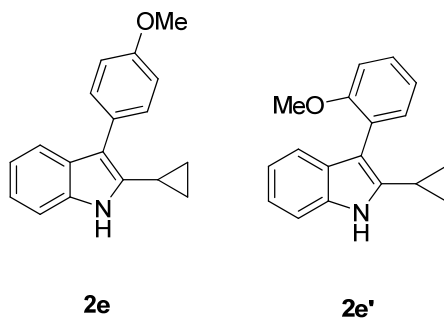

Yield of **2e+2e'**: 76% (**2e/ 2e'** = 8/1). Major isomer **2e**:  $^1\text{H}$  NMR (600 MHz,  $\text{CDCl}_3$ )  $\delta$  7.73 (bs, 1H), 7.64 (d,  $J = 7.8$  Hz, 1H), 7.56 (d,  $J = 8.4$  Hz, 2H), 7.30 (d,  $J = 7.8$  Hz, 1H), 7.16 (t,  $J = 7.2$  Hz, 1H), 7.11 (t,  $J = 7.5$  Hz, 1H), 7.03 (d,  $J = 9.0$  Hz, 2H), 3.89 (s, 3H), 2.18 – 2.23 (m, 1H), 0.97 – 1.00 (m, 2H), 0.71 – 0.76 (m, 2H);  $^{13}\text{C}$  NMR (150 MHz,  $\text{CDCl}_3$ )  $\delta$  157.8, 135.8, 134.7, 130.6, 128.2, 127.7, 121.5, 119.9, 118.7, 114.7, 113.8, 110.3, 55.4, 8.1, 7.5; IR (neat): 3411, 3007, 2835, 1559, 1511, 1461, 1333, 1312, 1282, 1241, 1176, 1034, 987, 838, 744, 726; MS ( $\text{ES}^+$ ) Calculated for  $[\text{C}_{18}\text{H}_{17}\text{NNaO}]^+$ : 286.12; Found: 286.10.

## 2-Cyclopentyl-3-(4-methoxy-phenyl)-1H-indole

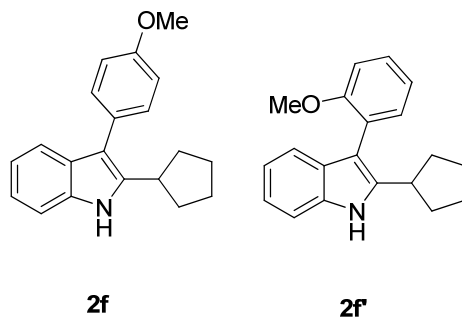

Yield of **2f+2f'**: 75% (**2f/ 2f'** = 15/1). Major isomer **2f**:  $^1\text{H}$  NMR (500 MHz,  $\text{CDCl}_3$ )  $\delta$  7.98 (bs, 1H), 7.60 (d,  $J = 8.0$  Hz, 1H), 7.45 (d,  $J = 8.5$  Hz, 2H), 7.36 (d,  $J = 8.0$  Hz, 1H), 7.19 (t,  $J = 7.5$  Hz, 1H), 7.12 (t,  $J = 7.5$  Hz, 1H), 7.05 (d,  $J = 9.0$  Hz, 2H), 3.90 (s, 3H), 3.42 (quint,  $J = 8.8$  Hz, 1H), 2.14 – 2.08 (m, 2H), 1.90 – 1.83 (m, 2H), 1.77 – 1.68 (m, 4H);  $^{13}\text{C}$  NMR (125 MHz,  $\text{CDCl}_3$ )  $\delta$  158.0, 138.8, 135.2, 130.9, 128.2, 127.9, 121.5, 119.8, 118.8, 114.0, 113.9, 110.4, 55.3, 36.9, 34.0, 26.0; IR (neat): 3416, 3056, 2955, 2867, 2835, 1611, 1561, 1509, 1460, 1281, 1241, 1174, 1032, 1018, 908, 834, 745; MS ( $\text{ES}^+$ ) Calculated for  $[\text{C}_{20}\text{H}_{21}\text{NNaO}]^+$ : 314.15; Found: 314.13.

## 2-Cyclohexyl-3-(4-methoxy-phenyl)-1H-indole

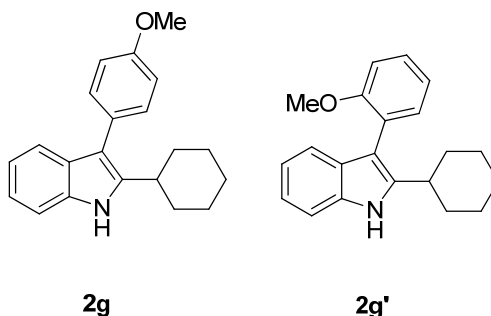

Yield of **2g+2g'**: 82% (**2g/ 2g'** = 16/1). Major isomer **2g**:  $^1\text{H}$  NMR (600 MHz,  $\text{CDCl}_3$ )  $\delta$  8.00 (bs, 1H), 7.59 (d, 1H,  $J = 7.8$  Hz), 7.41 (d, 2H,  $J = 9.0$  Hz), 7.35 (d, 1H,  $J = 7.8$  Hz), 7.18 (t, 1H,  $J = 7.6$  Hz), 7.11 (t, 1H,  $J = 7.5$  Hz), 7.04 (d, 2H,  $J = 8.4$  Hz), 3.90 (s, 3H), 2.99 (tt, 1H,  $J = 12.3$  Hz, 3.6 Hz), 1.96 – 1.99 (m, 2H), 1.84 – 1.87 (m, 2H), 1.71 – 1.79 (m, 1H), 1.49 – 1.56 (m, 2H), 1.35 – 1.42 (m, 2H), 1.27 – 1.32 (m, 1H);  $^{13}\text{C}$  NMR (150 MHz,  $\text{CDCl}_3$ )  $\delta$  157.9, 140.4, 134.9, 130.8, 128.1, 127.9, 121.4, 119.7, 118.9, 114.0, 112.7, 110.4, 55.3, 35.5, 33.7, 26.5, 26.1; IR (neat): 3416, 3056, 2926, 2850, 1560, 1509, 1497, 1459, 1281, 1245, 1172, 1037, 1021, 831, 744; MS ( $\text{ES}^+$ ) Calculated for  $[\text{C}_{21}\text{H}_{23}\text{NNaO}]^+$ : 328.17; Found: 328.16.

### 2-*tert*-Butyl-3-(4-methoxy-phenyl)-1*H*-indole

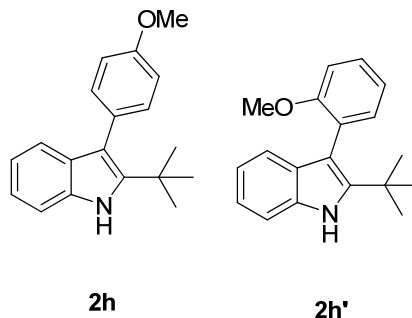

Yield of **2h+2h'**: 75% (**2h/ 2h'** = 25/1). Major isomer **2h**:  $^1\text{H}$  NMR (500 MHz,  $\text{CDCl}_3$ )  $\delta$  8.02 (bs, 1H), 7.34 (d, 1H,  $J = 8.0$  Hz), 7.29 (d, 2H,  $J = 4.5$  Hz), 7.13 – 7.19 (m, 2H), 7.03 (t, 1H,  $J = 7.8$  Hz), 6.96 (d, 2H,  $J = 8.5$  Hz), 3.88 (s, 3H), 1.33 (s, 9H);  $^{13}\text{C}$  NMR (125 MHz,  $\text{CDCl}_3$ )  $\delta$  158.4, 142.6, 133.4, 132.5, 130.9, 129.0, 121.4, 119.5, 118.9, 113.3, 113.2, 110.0, 55.2, 33.2, 31.0; IR (neat): 3427, 2961, 1552, 1504, 1455, 1300, 1281, 1241, 1173, 1036, 829, 744; MS ( $\text{ES}^+$ ) Calculated for  $[\text{C}_{19}\text{H}_{21}\text{NNaO}]^+$ : 302.15; Found: 302.12.

### 3-(4-Methoxy-phenyl)-1*H*-indole

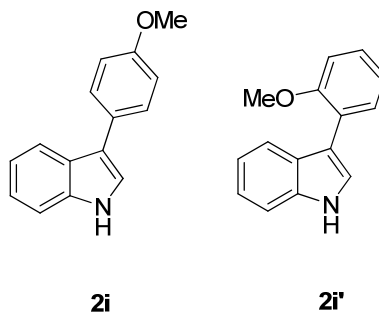

Yield of **2i+2i'**: 91% (**2i/ 2i'** = 3/1). Major isomer **2i**:  $^1\text{H}$  NMR (600 MHz,  $\text{CDCl}_3$ )  $\delta$  8.13 (bs, 1H), 7.92 – 7.95 (m, 1H), 7.60 – 7.64 (m, 2H), 7.39 – 7.43 (m, 1H), 7.25 – 7.28 (m, 3H), 7.17 – 7.25 (m, 1H), 7.01 – 7.05 (m, 2H), 3.89 (s, 3H); **2i** and **2i'**:  $^{13}\text{C}$  NMR (150 MHz,  $\text{CDCl}_3$ )  $\delta$  158.2 (major) 156.8 (minor), 136.7(major), 136.2 (minor), 128.7, 128.2, 130.6, 127.4 (major), 126.7, 126.0, 124.3, 124.2, 122.4 (major), 122.2, 121.3 (major), 120.8, 120.6, 120.2 (major), 120.0, 119.8 (major), 118.1 (major), 114.4, 113.6, 111.5 (major), 111.4, 111.3, 55.6 (major), 55.5 (minor); IR (neat):3410, 3055, 2956, 2834, 1550, 1502, 1456, 1331, 1280, 1246, 1179, 1196, 1030, 961, 836, 744; MS ( $\text{ES}^+$ ) Calculated for  $[\text{C}_{15}\text{H}_{13}\text{NNaO}]^+$ : 246.09; Found: 246.08.

## 2,3-Bis-(4-methoxy-phenyl)-1H-indole

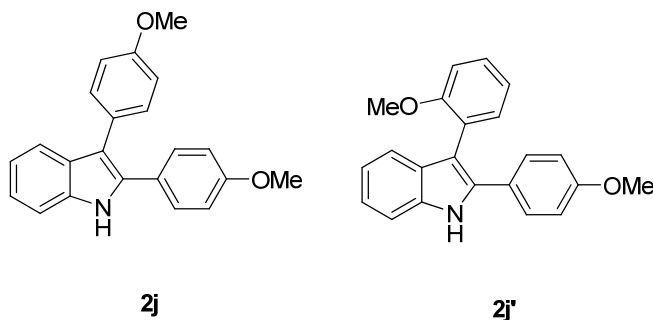

Yield of **2j+2j'**: 76% (**2j/ 2j'** = 7/1). Major isomer **2j**:  $^1\text{H}$  NMR (600 MHz,  $\text{CDCl}_3$ )  $\delta$  8.15 (bs, 1H), 7.65 (d,  $J = 7.8$  Hz, 1H), 7.39 – 7.41 (m, 1H), 7.33 – 7.38 (m, 4H), 7.21 – 7.24 (m, 1H), 7.13 – 7.17 (m, 1H), 6.95 (d,  $J = 8.4$  Hz, 2H), 6.87 (d,  $J = 8.4$  Hz, 2H), 3.86 (s, 3H), 3.82 (s, 3H); **2j** and **2j'**:  $^{13}\text{C}$  NMR (150 MHz,  $\text{CDCl}_3$ )  $\delta$  159.1 (major), 158.9 (minor), 158.0 (major), 149.8 (minor), 135.7 (major), 133.7 (major), 132.6, 131.1 (major), 129.3 (major), 129.0, 128.4, 128.1, 127.5, 126.0, 125.3, 122.3, 122.1, 120.7, 120.2, 120.0, 119.4, 114.1 (major), 114.0 (major), 113.9, 113.8, 111.3 (minor), 110.7 (major), 55.3, 55.2; IR (neat): 3403, 3001, 2936, 2836, 1610, 1576, 1556, 1519, 1497, 1456, 1289, 1246, 1178, 1030, 909, 832, 747, 730; MS ( $\text{ES}^+$ ) Calculated for  $[\text{C}_{22}\text{H}_{19}\text{NNaO}_2]^+$ : 352.13; Found: 352.12.

## 4-[3-(4-Methoxy-phenyl)-1H-indol-2-yl]-benzoic acid methyl ester

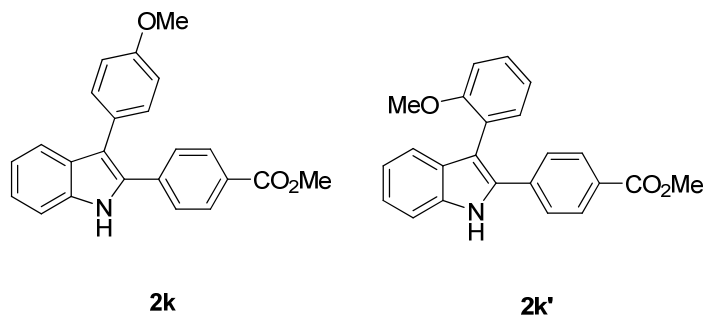

Yield of **2k+2k'**: 95%, (**2k/ 2k'** = 7/1). Major isomer **2k**:  $^1\text{H}$  NMR (600 MHz,  $\text{CDCl}_3$ )  $\delta$  8.44 (bs, 1H), 7.93 – 8.00 (m, 2H), 7.62 – 7.68 (m, 1H), 7.39 – 7.51 (m, 3H), 7.32 – 7.37 (m, 2H), 7.24 – 7.28 (m, 1H), 7.14 – 7.19 (m, 1H), 6.93 – 6.98 (m, 2H), 3.92 (s, 3H), 3.87 (s, 3H);  $^{13}\text{C}$  NMR (150 MHz,  $\text{CDCl}_3$ )  $\delta$  166.9 (major), 158.5 (major), 157.3 (minor), 138.0, 137.3 (major), 136.3 (major), 133.3, 132.4, 131.2 (major), 129.9 (major), 129.8, 129.3, 129.0, 128.6, 128.4, 127.7 (major), 126.9, 126.7, 123.5, 123.3 (major), 123.1, 120.9, 120.5 (major), 120.4, 120.0

(major), 116.4, 114.2 (major), 112.8, 111.4, 110.1 (major), 55.3, 55.1, 52.2; IR (neat):3339, 2950, 1688, 1605, 1567, 1518, 1432, 1286, 1240, 1177, 1110, 741; MS (ES<sup>+</sup>) Calculated for [C<sub>23</sub>H<sub>19</sub>NNaO<sub>3</sub>]<sup>+</sup>: 380.13; Found: 380.12.

### 2-Butyl-3-(4-methoxy-phenyl)-5,7-dimethyl-1H-indole 2l

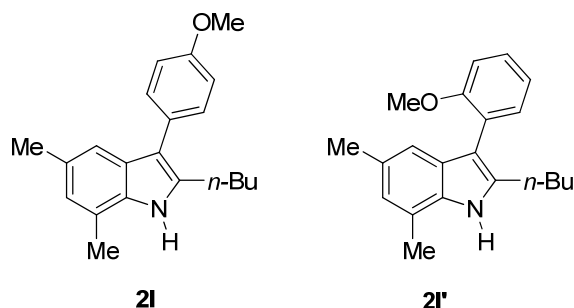

Yield of **2l+2l'**: 82 % (**2l/ 2l'** = 8/1). Major isomer **2l**: <sup>1</sup>H NMR (400 MHz, CDCl<sub>3</sub>) δ 7.81 (bs, 1H), 7.45 (dt, *J* = 9.6 Hz, 2.4 Hz, 2H), 7.28 (s, 1H), 7.06 (td, *J* = 9.6 Hz, 2.4 Hz, 2H), 6.87 (s, 1H), 3.92 (s, 3H), 2.87 (t, *J* = 7.6 Hz, 2H), 2.52 (s, 3H), 2.45 (s, 3H), 1.68 – 1.76 (m, 2H), 1.38 – 1.47 (m, 2H), 0.95 (t, *J* = 7.6 Hz, 3H); <sup>13</sup>C NMR (100 MHz, CDCl<sub>3</sub>) δ 157.8 (major), 135.6 (major), 132.8, 132.4, 130.7 (major), 129.2, 128.9, 128.1, 127.9, 127.7, 123.7 (major), 123.4, 120.4, 119.1, 116.7, 116.2 (major), 114.0, 113.8, 111.0 (major), 55.3, 55.2, 32.2 (major), 31.6(minor), 26.7(minor), 26.1(major), 22.5, 21.4, 16.5, 13.8; IR (neat): 2956, 1645, 1597, 1509, 1458, 1314, 1248, 1170, 1030, 835; MS (ES<sup>+</sup>) Calculated for [C<sub>21</sub>H<sub>26</sub>NO]<sup>+</sup>: 308.20; Found: 308.18.

### 2-Butyl-4,6-dichloro-3-(4-methoxy-phenyl)-1H-indole

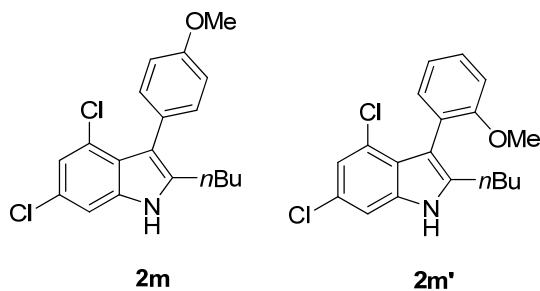

Yield of **2m+2m'**: 78% (**2m/ 2m'** = 7/1). Major isomer **2m**:  $^1\text{H}$  NMR (400 MHz,  $\text{CDCl}_3$ )  $\delta$  8.08 (bs, 1H), 7.25 – 7.31 (m, 3H), 7.08 (d,  $J = 1.6\text{Hz}$ , 1H), 6.96 – 6.98 (m, 2H), 4.09 (s, 3H), 2.66 (t,  $J = 7.6\text{ Hz}$ , 2H), 1.59 – 1.65 (m, 2H), 1.30 – 1.36 (m, 2H), 0.89 (t,  $J = 7.6\text{ Hz}$ , 2H);  $^{13}\text{C}$  NMR (100 MHz,  $\text{CDCl}_3$ )  $\delta$  158.5, 138.6, 136.1, 132.7, 126.7, 126.5, 126.0, 123.8, 121.0, 120.9, 112.8, 109.1, 55.2, 31.7, 25.7, 22.3, 13.8; IR (neat): 3428, 2956, 2930, 1614, 1553, 1509, 1444, 1243, 1175, 1036, 831; MS ( $\text{ES}^+$ ) Calculated for  $[\text{C}_{19}\text{H}_{20}\text{Cl}_2\text{NO}]^+$ : 348.09; Found: 348.06.

### General procedure B: the synthesis of indole derivatives **5** using different nucleophiles:

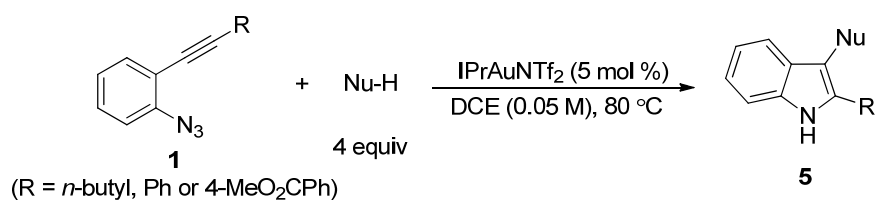

*o*-Alkynylarylazides **1** (0.30 mmol) and IPrAuNTf<sub>2</sub> (12.9 mg, 0.015 mmol) were added to a solution of the nucleophiles (1.2 mmol or 0.6 mmol) in DCE (3 mL) at room temperature. The reaction mixture was then stirred at 80 °C and the progress of the reaction was monitored by TLC. The reaction typically took 3 h. Upon completion, the mixture was concentrated and the residue was purified by chromatography on silica gel (eluent: hexanes/ethyl acetate) to afford the desired products **5**.

### 3-(2,5-Dimethyl-phenyl)-2-phenyl-1*H*-indole

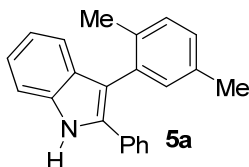

Yield: 70%.  $^1\text{H}$  NMR (600 MHz,  $\text{CDCl}_3$ )  $\delta$  8.28 (bs, 1H), 7.43 (d,  $J = 7.8\text{ Hz}$ , 1H), 7.35 (t,  $J = 9.3\text{ Hz}$ , 3H), 7.29 – 7.20 (m, 4H), 7.17 – 7.09 (m, 2H), 7.11 – 7.07 (m, 2H), 2.32 (s, 3H), 1.95 (s, 3H);  $^{13}\text{C}$  NMR (100 MHz,  $\text{CDCl}_3$ )  $\delta$  135.8, 135.1, 134.5, 134.2, 133.0, 132.0, 130.1, 129.7, 128.7, 128.3, 127.9, 127.3, 126.6, 122.6, 120.1, 120.0, 114.9, 110.7, 21.0, 19.6; IR (neat): 3407, 3055, 2917, 1603, 1505, 1484, 1456, 1446, 1327, 1252, 909, 811, 761, 745, 728; MS ( $\text{ES}^+$ ) Calculated for  $[\text{C}_{22}\text{H}_{19}\text{KN}]^+$ : 336.12; Found: 336.11.

### 2-Butyl-3-naphthalen-1-yl-1H-indole

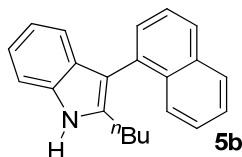

Yield: 78%.  $^1\text{H}$  NMR (500 MHz,  $\text{CDCl}_3$ )  $\delta$  8.10 (bs, 1H), 7.89 – 7.95 (m, 2 H), 7.78 (d,  $J = 8.5$  Hz, 1H), 7.57 (dd,  $J = 7.5, 7.0$  Hz, 1H), 7.48 – 7.51 (m, 2H), 7.41 – 7.42 (m, 1H), 7.35 – 7.38 (m, 1H), 7.18 – 7.21 (m, 2H), 7.03 – 7.06 (m, 1H), 2.62 – 2.76 (m, 2H), 1.56 – 1.63 (m, 2H), 1.23 – 1.30 (m, 2H), 0.79 (t,  $J = 7.5$  Hz, 3H);  $^{13}\text{C}$  NMR (100 MHz,  $\text{CDCl}_3$ )  $\delta$  137.2, 135.1, 133.9, 133.8, 133.2, 133.0, 129.4, 128.7, 128.2, 127.2, 126.8, 125.6, 125.5, 121.4, 119.7, 119.5, 112.7, 110.3, 31.7, 30.9, 26.3, 22.3, 13.7; IR (neat): 3407, 3051, 2955, 2927, 2870, 1591, 1506, 1457, 1438, 1316, 1244, 1011, 800, 778, 762, 743, 716; MS ( $\text{ES}^+$ ) Calculated for  $[\text{C}_{22}\text{H}_{21}\text{NaN}]^+$ : 322.16; Found: 322.16.

### 2-Butyl-3-(2,4-dimethoxy-phenyl)-1H-indole

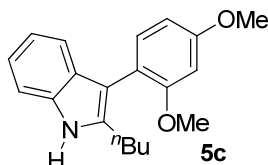

Yield: 84%.  $^1\text{H}$  NMR (400 MHz,  $\text{CDCl}_3$ )  $\delta$  7.97 (bs, 1H), 7.38 (d,  $J = 8.0$  Hz, 1H), 7.32 (dd,  $J = 8.4$  Hz, 0.8 Hz, 1H), 7.26 (d,  $J = 8.0$  Hz, 1H), 7.11 – 7.15 (m, 1H), 7.04 – 7.08 (m, 1H), 6.59 – 6.62 (m, 2H), 3.89 (s, 3H), 2.71 (t,  $J = 8.0$  Hz, 2H), 1.58 – 1.64 (m, 2H), 1.32 – 1.38 (m, 2H), 0.89 (t,  $J = 7.6$  Hz, 3H);  $^{13}\text{C}$  NMR (100 MHz,  $\text{CDCl}_3$ )  $\delta$  159.7, 158.4, 136.8, 135.2, 132.7, 128.7, 121.0, 119.4, 119.3, 116.5, 110.2, 109.9, 104.2, 98.9, 55.4, 55.3, 31.6, 26.5, 22.6, 13.9; IR (neat): 3391, 2955, 2932, 2870, 2834, 1610, 1565, 1505, 1460, 1332, 1299, 1260, 1207, 1157, 1131, 1109, 1033, 743; MS ( $\text{ES}^+$ ) Calculated for  $[\text{C}_{20}\text{H}_{23}\text{NNaO}_2]^+$ : 332.16; Found: 332.16.

### 2-Butyl-3-(2,4,6-trimethoxy-phenyl)-1H-indole

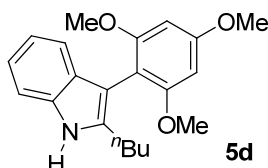

Yield: 84%.  $^1\text{H}$  NMR (500 MHz,  $\text{CDCl}_3$ )  $\delta$  7.96 (bs, 1H), 7.28 (dd,  $J = 8.0$  Hz, 1.0 Hz, 1H), 7.21 (d,  $J = 7.5$  Hz, 1H), 7.08 – 7.12 (m, 1H), 7.01 – 7.04 (m, 1H), 6.30 (s, 2H), 3.91 (s, 3H), 3.71 (s, 6H), 2.61 (t,  $J = 7.5$  Hz, 2H), 1.59 – 1.68 (m, 2H), 1.32 – 1.38 (m, 2H), 0.89 (t,  $J = 7.5$  Hz, 3H);  $^{13}\text{C}$  NMR (125 MHz,  $\text{CDCl}_3$ )  $\delta$  160.4, 159.6, 137.6, 135.4, 129.0, 120.6, 119.7, 119.1, 110.4, 105.3, 105.0, 90.9, 55.7, 55.4, 31.1, 26.9, 22.6, 13.9; IR (neat): 3390, 2955, 2934, 2870, 2837, 1607, 1585, 1499, 1458, 1411, 1334, 1224, 1203, 1154, 1125, 1063, 810, 742; MS ( $\text{ES}^+$ ) Calculated for  $[\text{C}_{21}\text{H}_{25}\text{NNaO}_3]^+$ : 362.17; Found: 362.17.

### 2-Butyl-3-(1-methyl-1H-pyrrol-2-yl)-1H-indole and 2-Butyl-3-(2-methyl-1H-pyrrol-3-yl)-1H-indole

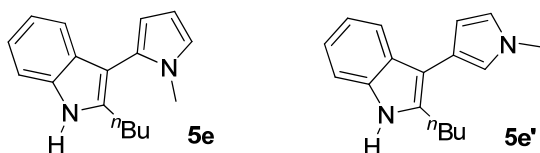

Yield: 91% (**5e** / **5e'** = 1:1).  $^1\text{H}$  NMR (500 MHz,  $\text{CDCl}_3$ )  $\delta$  8.02 (bs, 0.5H), 7.86 (bs, 0.5H), 7.74 (d,  $J = 8.0$  Hz, 0.5H), 7.30 – 7.37 (m, 1.5H), 7.10 – 7.18 (m, 1H), 6.79 (d,  $J = 9.0$  Hz, 0.5H), 6.71 (s, 0.5H), 6.37 (s, 0.5H), 6.26 (s, 0.5H), 6.14 (s, 0.5H), 3.75 (s, 1.5H), 3.47 (s, 1.5H), 2.91 (t,  $J = 7.2$  Hz, 1H), 2.70 – 2.79 (m, 1H), 1.56 – 1.73 (m, 2H), 1.32 – 1.48 (m, 2H), 0.96 (t,  $J = 7.2$  Hz, 1.5H), 0.90 (t,  $J = 7.2$  Hz, 1.5H);  $^{13}\text{C}$  NMR (125 MHz,  $\text{CDCl}_3$ )  $\delta$  138.8, 135.2, 135.1, 135.0, 129.3, 128.3, 127.0, 121.9, 121.7, 121.4, 121.1, 119.9, 119.7, 119.4, 119.4, 119.3, 117.5, 110.4, 110.1, 109.6, 108.9, 108.5, 107.3, 105.7, 36.3, 34.3, 32.0, 31.8, 26.5, 26.2, 24.7, 22.7, 22.4, 14.0, 13.8; IR (neat): 3396, 3055, 2956, 2927, 2871, 2859, 1504, 1488, 1458, 1440, 1417, 1326, 1286, 1241, 1171, 781, 743; MS ( $\text{ES}^+$ ) Calculated for  $[\text{C}_{17}\text{H}_{20}\text{KN}_2]^+$ : 291.13; Found: 291.14.

### 2-Phenyl-3-(1-triisopropylsilyl-1H-pyrrol-3-yl)-1H-indole

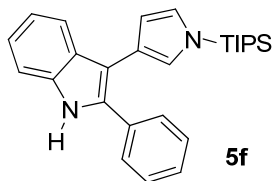

Yield: 69%.  $^1\text{H}$  NMR (500 MHz,  $\text{CDCl}_3$ )  $\delta$  8.10 (bs, 1H), 7.77 (d,  $J = 7.5$  Hz, 1H), 7.58 – 7.60 (m, 2H), 7.38 – 7.40 (m, 1H), 7.31 – 7.35 (m, 2H), 7.23 – 7.29 (m, 1H), 7.20 – 7.23 (m, 1H), 7.13 – 7.16 (m, 1H), 6.83 (s, 1H), 6.79 (s, 1H), 6.41 – 6.42 (m, 1H), 1.41 – 1.47 (m, 3H), 1.12 (d,  $J =$



6.0 Hz, 1H);  $^{13}\text{C}$  NMR (125 MHz,  $\text{CDCl}_3$ )  $\delta$  136.0, 133.6, 133.1, 129.4, 128.4, 127.9, 127.2, 124.1, 122.7, 122.3, 120.3, 119.9, 118.5, 111.7, 110.6, 110.0, 17.9, 11.7; IR (neat): 3408, 2945, 2866, 1652, 749, 706; MS ( $\text{ES}^+$ ) Calculated for  $[\text{C}_{27}\text{H}_{34}\text{N}_2\text{NaSi}]^+$ : 437.24; Found: 437.22.

#### 4-(5'-Nitro-1*H*,1'*H*-[3,3']biindolyl-2-yl)-benzoic acid methyl ester

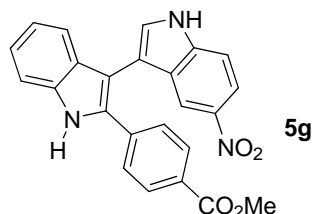

Yield: 83%.  $^1\text{H}$  NMR (400 MHz,  $d_6$ -DMSO)  $\delta$  12.15 (bs, 1H), 11.90 (bs, 1H), 8.05 (dd,  $J = 8.5$  Hz, 2.5 Hz, 1H), 7.92 (d,  $J = 10.5$  Hz, 1H), 7.88 (s, 1H), 7.85 (s, 1H), 7.68–7.72 (m, 3 H), 7.58 (d,  $J = 10.0$  Hz, 1H), 7.49 (d,  $J = 10.5$  Hz, 1H), 7.27–7.31 (m, 1H), 7.10–7.14 (m, 1H), 3.88 (s, 3H);  $^{13}\text{C}$  NMR (100 MHz,  $d_6$ -DMSO)  $\delta$  166.5, 140.9, 140.2, 137.9, 137.3, 133.6, 129.9, 129.4, 128.8, 128.4, 128.0, 126.2, 123.4, 120.4, 119.9, 117.2, 117.0, 112.9, 112.3, 111.6, 107.1, 52.7, 31.3; IR (neat): 3435, 2916, 2848, 1635, 1264, 740; MS ( $\text{ES}^+$ ) Calculated for  $[\text{C}_{23}\text{H}_{17}\text{N}_3\text{NaO}_4]^+$ : 434.11; Found: 434.11

#### 4-(6'-Nitro-1*H*,1'*H*-[3,3']biindolyl-2-yl)-benzoic acid methyl ester

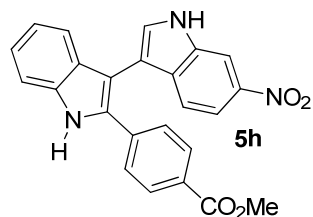

Yield: 81%.  $^1\text{H}$  NMR (400 MHz,  $d_6$ -acetone)  $\delta$  11.26 (bs, 1H), 10.93 (bs, 1H), 8.53 (s, 1H), 7.87–7.90 (m, 2 H), 7.79 (dd,  $J = 7.2$  Hz, 0.8 Hz, 1H), 7.69 (d,  $J = 8.4$  Hz, 1H), 7.55 (d,  $J = 8.0$  Hz, 1H), 7.49 (d,  $J = 8.0$  Hz, 1H), 7.20–7.25 (m, 2H), 7.06–7.10 (m, 1H), 3.84 (s, 3H);  $^{13}\text{C}$  NMR (100 MHz,  $d_6$ -acetone)  $\delta$  166.8, 143.1, 137.8, 137.7, 137.2, 137.0, 135.5, 133.6, 131.6, 131.0, 130.9, 129.6, 128.7, 127.4, 123.1, 120.07, 120.05, 119.8, 114.2, 111.6, 111.5, 108.7, 108.6, 51.5; IR (neat): 3376, 1700, 1607, 1504, 1435, 1329, 1106, 707; MS ( $\text{ES}^+$ ) Calculated for  $[\text{C}_{23}\text{H}_{17}\text{N}_3\text{NaO}_4]^+$ : 434.11; Found: 434.11

### 2,2'-dibutyl-4,6-dichloro-1*H*,1'*H*-3,3'-biindole

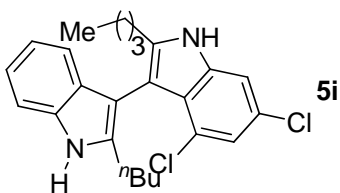

Yield: 64%.  $^1\text{H}$  NMR (400 MHz,  $\text{CDCl}_3$ )  $\delta$  8.13 (bs, 1H), 8.01 (bs, 1H), 7.36 (d, 1H,  $J = 8.0$  Hz), 7.25 (d, 1H,  $J = 1.6$  Hz), 7.19 – 7.12 (m, 2H), 7.00 – 7.05 (m, 2H), 2.53 – 2.67 (m, 4H), 1.50 – 1.64 (m, 4H), 1.22 – 1.32 (m, 4H), 0.79 – 0.84 (m, 6H);  $^{13}\text{C}$  NMR (100 MHz,  $\text{CDCl}_3$ )  $\delta$  140.2, 138.5, 136.6, 135.0, 130.9, 126.3, 125.2, 120.8, 119.3, 119.2, 110.0, 109.0, 105.7, 105.6, 31.4, 31.2, 26.5, 26.0, 22.4, 22.3, 22.2, 13.8; IR (neat): 3734, 2955, 2360, 2341, 1636, 1457, 1321, 745; MS ( $\text{ES}^+$ ) Calculated for  $[\text{C}_{24}\text{H}_{27}\text{Cl}_2\text{N}_2]^+$ : 413.16; Found: 413.15.

### 2-(2-butyl-1*H*-indol-3-yl)-3-hydroxy-5,5-dimethylcyclohex-2-enone 5j

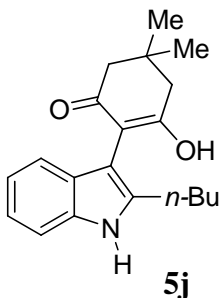

Yield: 49 %.  $^1\text{H}$  NMR (400 MHz,  $\text{CDCl}_3$ )  $\delta$  8.15 (bs, 1H), 7.22 (t,  $J = 9.2$  Hz, , 2H), 7.10 (td,  $J = 8.0$  Hz, 1.2 Hz, 1H), 7.04 (td,  $J = 7.2$  Hz, 1.2 Hz, 1H), 5.23 (s, 1H), 2.61 (s, 2H), 2.54 (t,  $J = 7.6$  Hz, 2H), 2.28 (s, 2H), 1.51 – 1.59 (m, 2H), 1.24 – 1.33 (m, 2H), 1.19 (s, 6H), 0.86 (t,  $J = 7.6$  Hz, 3H);  $^{13}\text{C}$  NMR (100 MHz,  $\text{CDCl}_3$ )  $\delta$  200.0, 177.2, 132.8, 128.2, 128.0, 121.8, 120.4, 119.9, 116.4, 111.0, 104.1, 50.8, 42.1, 32.9, 30.6, 28.3, 24.3, 22.2, 12.7; IR (neat): 2957, 2871, 1637, 1609, 1459, 1373, 1349, 1319, 1198, 1162, 1144, 738; MS ( $\text{ES}^+$ ) Calculated for  $[\text{C}_{20}\text{H}_{25}\text{NNaO}_2]^+$ : 334.18; Found: 334.14.

### 3-Butoxy-2-phenyl-1*H*-indole

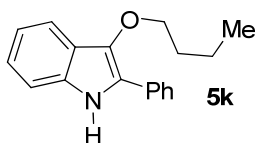

Compound **5k** was air sensitive. Its purification proceeded under N<sub>2</sub> protection. Yield: 66%. <sup>1</sup>H NMR (400 MHz, CDCl<sub>3</sub>) δ 7.85 (d, 2H, *J* = 7.2 Hz), 7.80 (bs, 1H), 7.68 (d, 1H, *J* = 8.0 Hz), 7.46 (t, 2H, *J* = 7.8 Hz), 7.29 – 7.34 (m, 2H), 7.20 (t, 1H, *J* = 8.0 Hz), 7.13 (t, 1H, *J* = 7.4 Hz), 4.12 (t, 2H, *J* = 6.6 Hz), 1.80 (quint, 2H, *J* = 7.1 Hz), 1.54 (sext, 2H, *J* = 7.4 Hz), 0.97 (t, 3H, *J* = 7.4 Hz); <sup>13</sup>C NMR (100 MHz, CDCl<sub>3</sub>) δ 136.7, 133.8, 131.6, 128.8, 126.9, 125.5, 124.4, 123.0, 122.7, 119.6, 118.2, 111.3, 73.9, 32.3, 19.3 13.9; IR (neat): 3410, 2957, 2932, 2871, 1665, 1604, 1457, 1338, 1316, 1238, 1073, 741, 692; MS (ES<sup>+</sup>) Calculated for [C<sub>18</sub>H<sub>19</sub>NNaO]<sup>+</sup>: 288.14; Found: 288.16.

### 3-Butoxy-2-butyl-1*H*-indole

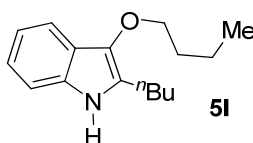

Compound **5l** was air sensitive. Its purification proceeded under N<sub>2</sub> protection. Yield: 62%. <sup>1</sup>H NMR (400 MHz, CDCl<sub>3</sub>) δ 7.57 (d, 1H, *J* = 8.0 Hz), 7.44 (bs, 1H), 7.22 – 7.25 (m, 1H), 7.06 – 7.14 (m, 2H), 4.06 (t, *J* = 6.6 Hz, 2H), 2.76 (t, *J* = 7.6 Hz, 2H), 1.74 – 1.81 (m, 2H), 1.51 – 1.70 (m, 4H), 1.37 – 1.46 (m, 2H), 1.00 (t, 3H, *J* = 7.4 Hz), 0.96 (t, 3H, *J* = 7.2 Hz); <sup>13</sup>C NMR (100 MHz, CDCl<sub>3</sub>) δ 134.9, 132.8, 127.2, 122.1, 121.1, 119.0, 117.2, 110.7, 74.4, 32.3, 31.4, 24.4, 22.5, 19.3, 14.0, 13.9; IR (neat): 3406, 2957, 2932, 1638, 1620, 1459, 1241, 913, 742; MS (ES<sup>+</sup>) Calculated for [C<sub>16</sub>H<sub>23</sub>NNaO]<sup>+</sup>: 268.17; Found: 268.15.

### 2-Allyl-2-butyl-1,2-dihydroindol-3-one

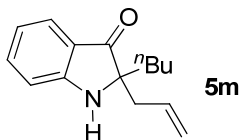

Yield: 65%. <sup>1</sup>H NMR (400 MHz, CDCl<sub>3</sub>) δ 7.57 (d, 1H, *J* = 8.0 Hz), 7.42 (t, 1H, *J* = 7.6 Hz), 6.85 (d, 1H, *J* = 8.4 Hz), 6.79 (t, 1H, *J* = 7.4 Hz), 5.62 – 5.72 (m, 1H), 5.02 – 5.12 (m, 2H), 4.61 (bs, 1H), 2.34 – 2.45 (m, 2H), 1.75 – 1.83 (m, 1H), 1.60 – 1.69 (m, 1H), 1.18 – 1.29 (m, 3H), 1.00 – 1.09 (m, 1H), 0.81 (t, 3H, *J* = 7.2 Hz); <sup>13</sup>C NMR (100 MHz, CDCl<sub>3</sub>) δ 204.5, 160.6,

137.1, 132.2, 124.5, 121.3, 119.2, 118.6, 112.2, 69.5, 41.8, 36.4, 25.3, 22.9, 13.9; IR (neat): 3340, 2957, 2933, 1680, 1621, 1492, 1469, 1326, 1142, 1100, 919, 752; MS (ES<sup>+</sup>) Calculated for [C<sub>15</sub>H<sub>19</sub>NNaO]<sup>+</sup>: 252.14; Found: 252.15.

### General procedure for the synthesis of **6** and **7**:

IPrAuNTf<sub>2</sub> (12.9 mg, 0.015 mmol) was added to the solution of **1c** or **1d** (0.30 mmol) in DCE (6.0 mL) at room temperature. The reaction mixture was then stirred at 80 °C and the progress of the reaction was monitored by TLC. The reaction typically took 3 hours. Upon completion, the mixture was concentrated and the residue was purified by chromatography on silica gel (eluent: hexanes/ethyl acetate) to afford the desired products **6** or **7**.

### 5,7-Dihydro-6*H*-benzo[*c*]carbazole

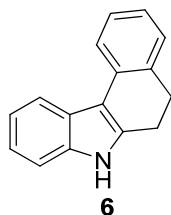

Yield: 73%. <sup>1</sup>H NMR (400 MHz, CDCl<sub>3</sub>) δ 8.04 (d, *J* = 8.4 Hz, 1H), 7.99 (bs, 1H), 7.87 (d, *J* = 7.6 Hz, 1H), 7.30 – 7.37 (m, 2H), 7.18 – 7.27 (m, 3H), 7.08 – 7.12 (m, 1H), 3.07 (t, *J* = 8.0 Hz, 2H), 2.96 (t, *J* = 8.0 Hz, 2H); <sup>13</sup>C NMR (100 MHz, CDCl<sub>3</sub>) δ 137.2, 136.1, 133.8, 133.3, 127.9, 126.9, 124.9, 124.3, 122.3, 121.4, 120.5, 119.5, 111.1, 29.5, 22.5; IR (neat): 3397, 3054, 2924, 1599, 1548, 1496, 1456, 1356, 1326, 1276, 1254, 1183, 1027, 767, 749; MS (ES<sup>+</sup>) Calculated for [C<sub>16</sub>H<sub>13</sub>NK]<sup>+</sup>: 258.07; Found: 258.06.

### 5,8-Dihydro-7*H*-6-oxa-8-aza-dibenzo[*a,h*]azulene

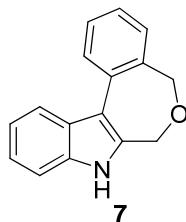

Yield: 72%.  $^1\text{H}$  NMR (400 MHz,  $\text{CDCl}_3$ )  $\delta$  8.12 (bs, 1H), 8.05 (dd,  $J = 7.6$  Hz, 2.4 Hz, 2H), 7.47–7.52 (m, 1H), 7.35 – 7.40 (m, 2H), 7.21 – 7.29 (m, 3H), 5.08 (s, 2H), 4.64 (s, 2H);  $^{13}\text{C}$  NMR (100 MHz,  $\text{CDCl}_3$ )  $\delta$  160.4, 159.6, 137.6, 135.4, 129.0, 120.6, 119.7, 119.1, 110.4, 105.3, 105.0, 90.9, 55.7, 55.4, 31.1, 26.9, 22.6, 13.9; IR (neat): 3391, 3275, 3059, 2855, 1603, 1552, 1494, 1459, 1392, 1328, 1259, 1231, 1185, 1124, 1101, 1051, 1020, 771, 741; MS ( $\text{ES}^+$ )  
Calculated for  $[\text{C}_{16}\text{H}_{13}\text{NNaO}]^+$ : 258.09; Found: 258.09.

### Reference:

1. Tomiok, H.; Sawai, S. *Org. Biomol. Chem.* **2003**, *1*, 4441.

lb-IV-modelsubstrate

expl s2pul

SAMPLE DEC. & VT  
date Apr 24 2011 dn C13  
solvent CDCl3 dof 0  
file /nmr500/Zhang~ dm nnn  
/biaolu/lb-IV-mode~ dmm c  
lsubstrate.fid dmf 200  
ACQUISITION PROCESSING  
sfrq 499.859 lb 0:20  
tn H1 fn 32768 i  
at 2.500 math  
np 42518  
sw 8503.4 verr  
fb not used wexp  
bs 2 wbs  
pw 7.7 wnt  
pw 7.7 DISPLAY  
tpwz 57 sp -280.0  
dl 4.800 wp 5833.6  
tof 0 vs 62  
nt 32 sc 0  
ct 22 wc 250  
alock n hzmm 23.33  
gain not used is 340.26  
FLAGS rfl 1752.4  
il n rfp 0  
in n th 33  
dp Y ins 2.000  
hs nn ai ph

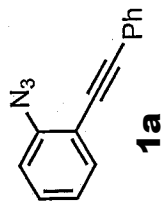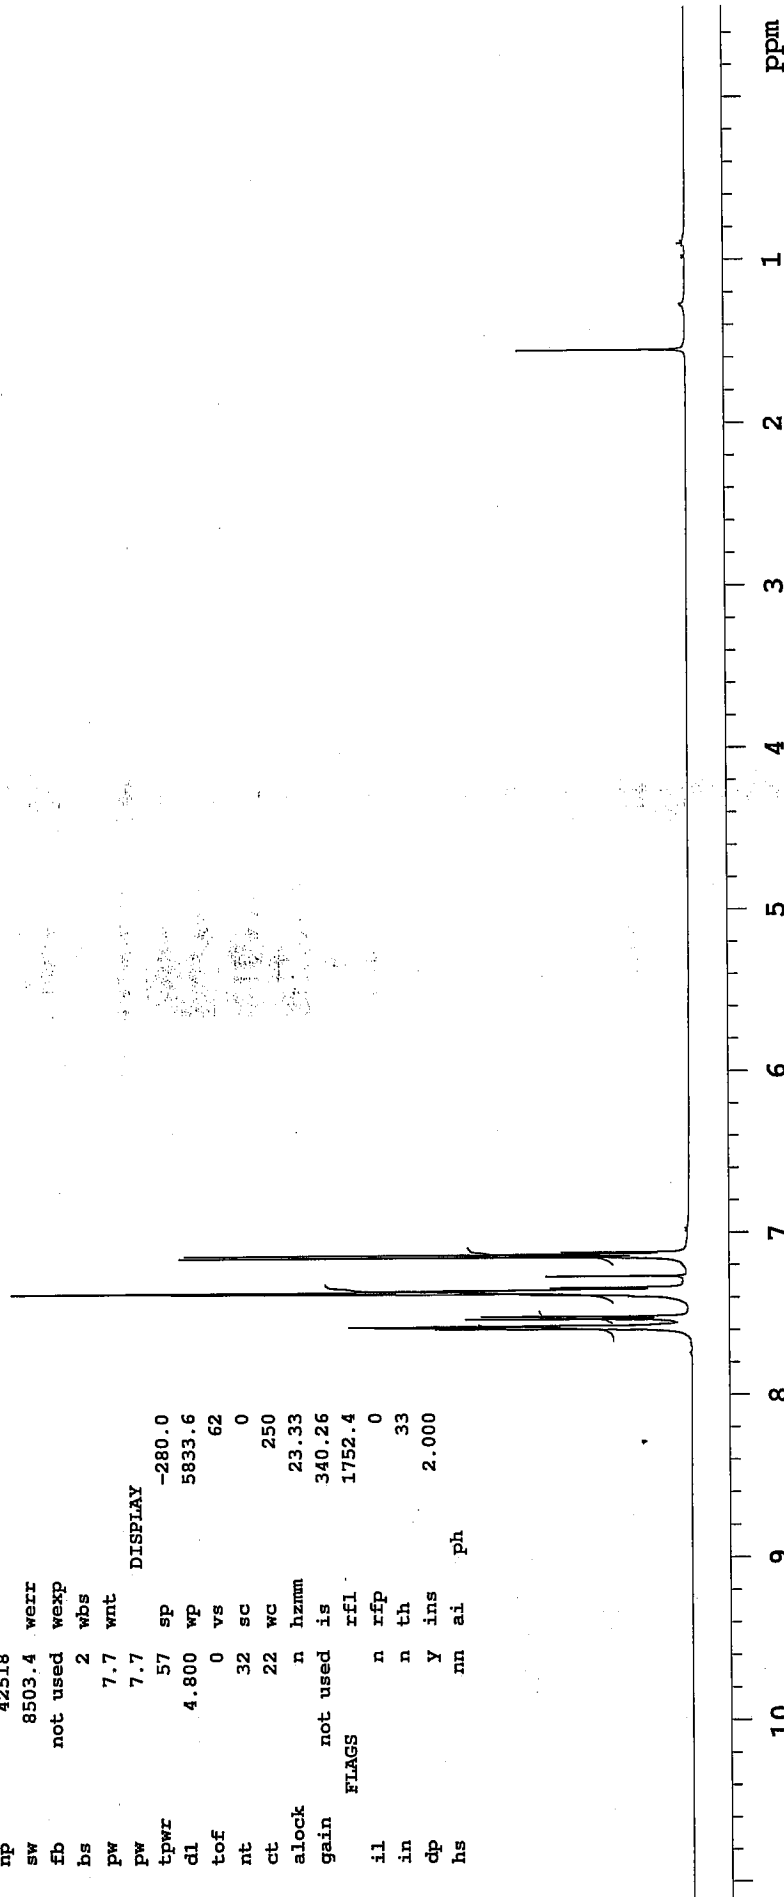

1.87.96  
1.02 2.00

Std carbon

expl Carbon

SAMPLE SPECIAL  
date Apr 24 2011 temp not used  
solvent CDCl3 gain 46  
file /nmr500/Zhang~ spin not used  
/biao1u/lb-iv-mode~ hst 0.008  
lsubstrate-C13.fid pw90 14.600  
ACQUISITION alfa 6.600  
sw 30165.9 FLAGS  
at 1.303 il n  
np 78590 in n  
fb not used dp y  
bs 4 hs nn  
ss 2 PROCESSING  
dl 1.000 lb 0.50  
nt 10000 fn not used  
ct 116 DISPLAY  
TRANSMITTER sp -422.8  
tn C13 wp 24087.7  
sfrq 125.702 rfl 1885.6  
tof 1285.5 rfp 0  
tpwr 57 rp -57.0  
pw 7.000 lp -180.3  
DECOUPLER PLOT  
dn H1 wc 250  
dof 0 sc 0  
dm YYY vs 3018  
dmm w th 9  
dpwr 38 ai cdc ph  
dmf 10000

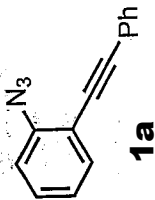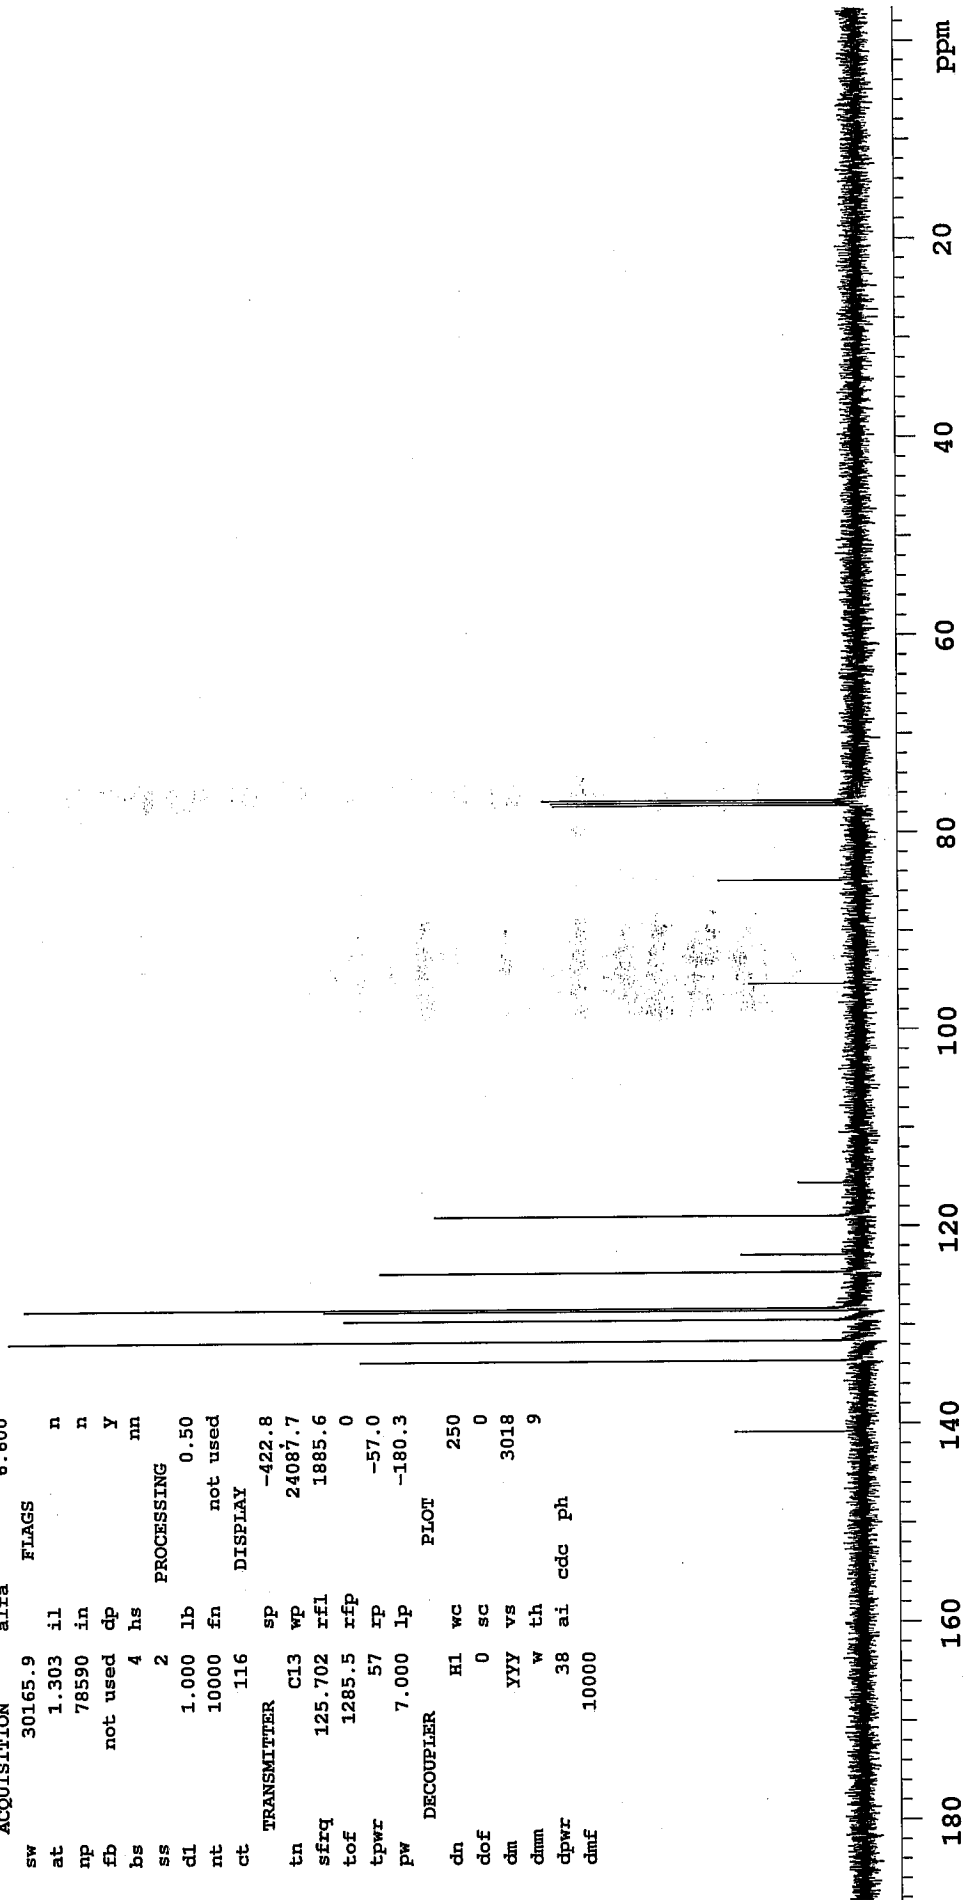

C:\Users\zhang\_laptop\Desktop\NMR\Nuts\DATA\1z-1-132-1h.fid

H1\_CDCL3U  
Apr 22 2011

USER:

SOLVENT: CDCl3

Experiment = s2pul

Pulse length = 7.700 usec

Relaxation delay = 4.800 sec

NA = 16

Solvent = CDCl3

FID PTS1d = 21259

PTS1d = 32768

F1 = 499.858551 MHz

F2 = 125.700813 MHz

SW1 = 8503.40 Hz

AT1 = 2.50 sec

Hz per Pt1sID = 0.26 Hz

SW2 = 1.00 Hz

Hz per Pt2ncID = 1.00 Hz

O1 = 2495.9021 Hz

O2 = -0.5000 Hz

LB1 = 0.00 Hz

TP A = 117.13

B = -11.78

C = 0.00

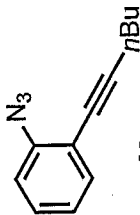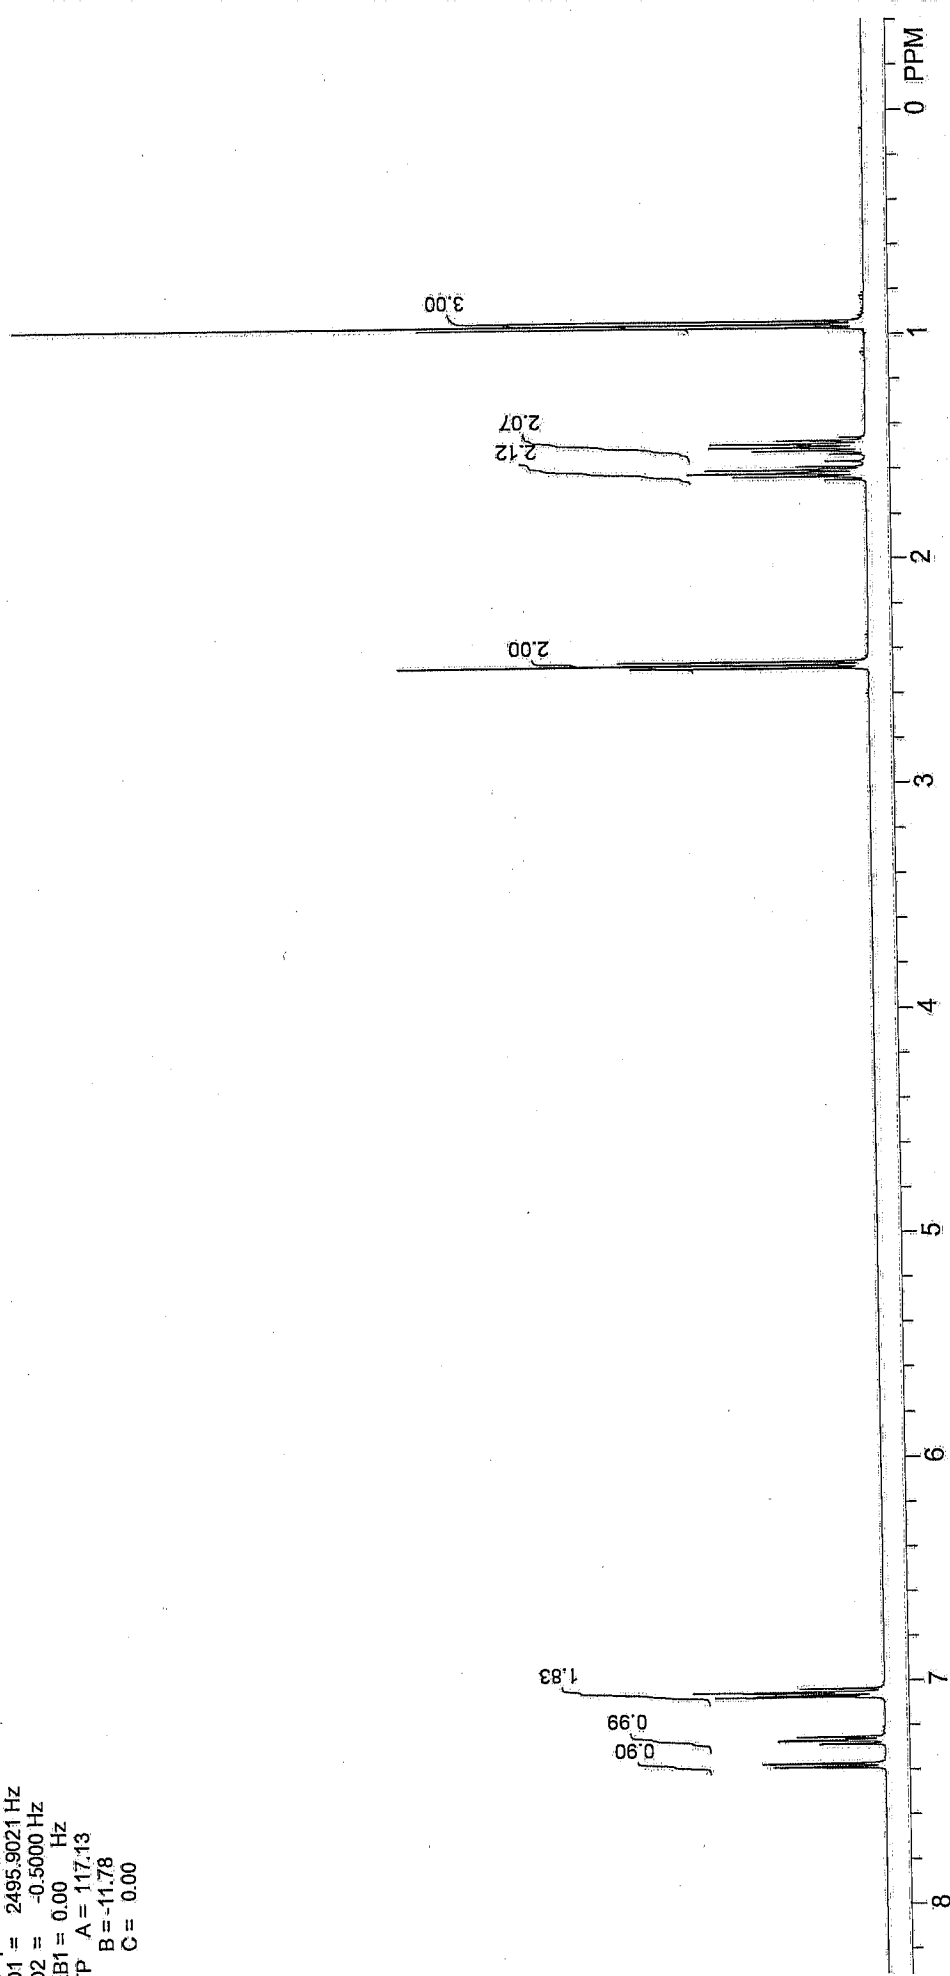



C:\Users\zhang\_laptop\Desktop\NMR\inuts\DATA\1z-1-132-13c.fid

Sid carbon; blank line 7\_1  
May 1 2011

USER: SOLVENT: CDCI3  
Experiment = s2pul  
Pulse length = 7.000 usec  
Relaxation delay = 1.000 sec

NA = 136  
Solvent = CDCI3  
FID PTS1d = 39295

PTS1d = 65536

F1 = 425.702103 MHz

F2 = 499.858551 MHz

SW1 = 30165.91 Hz

AT1 = 1.30 sec

Hz per Pt 1std = 0.46 Hz

SW2 = 1.00 Hz

Hz per Pt 2ndd = 1.00 Hz

O1 = 13197.3711 Hz

O2 = -0.5000 Hz

LB1 = 2.00 Hz

TP A = -185.16

B = 143.44

C = 0.00

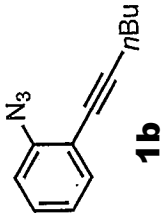

13.633  
19.368  
22.042  
30.688

76.151  
76.774  
77.026  
77.283

96.931

116.307  
118.703  
124.544  
128.715  
133.736  
140.577

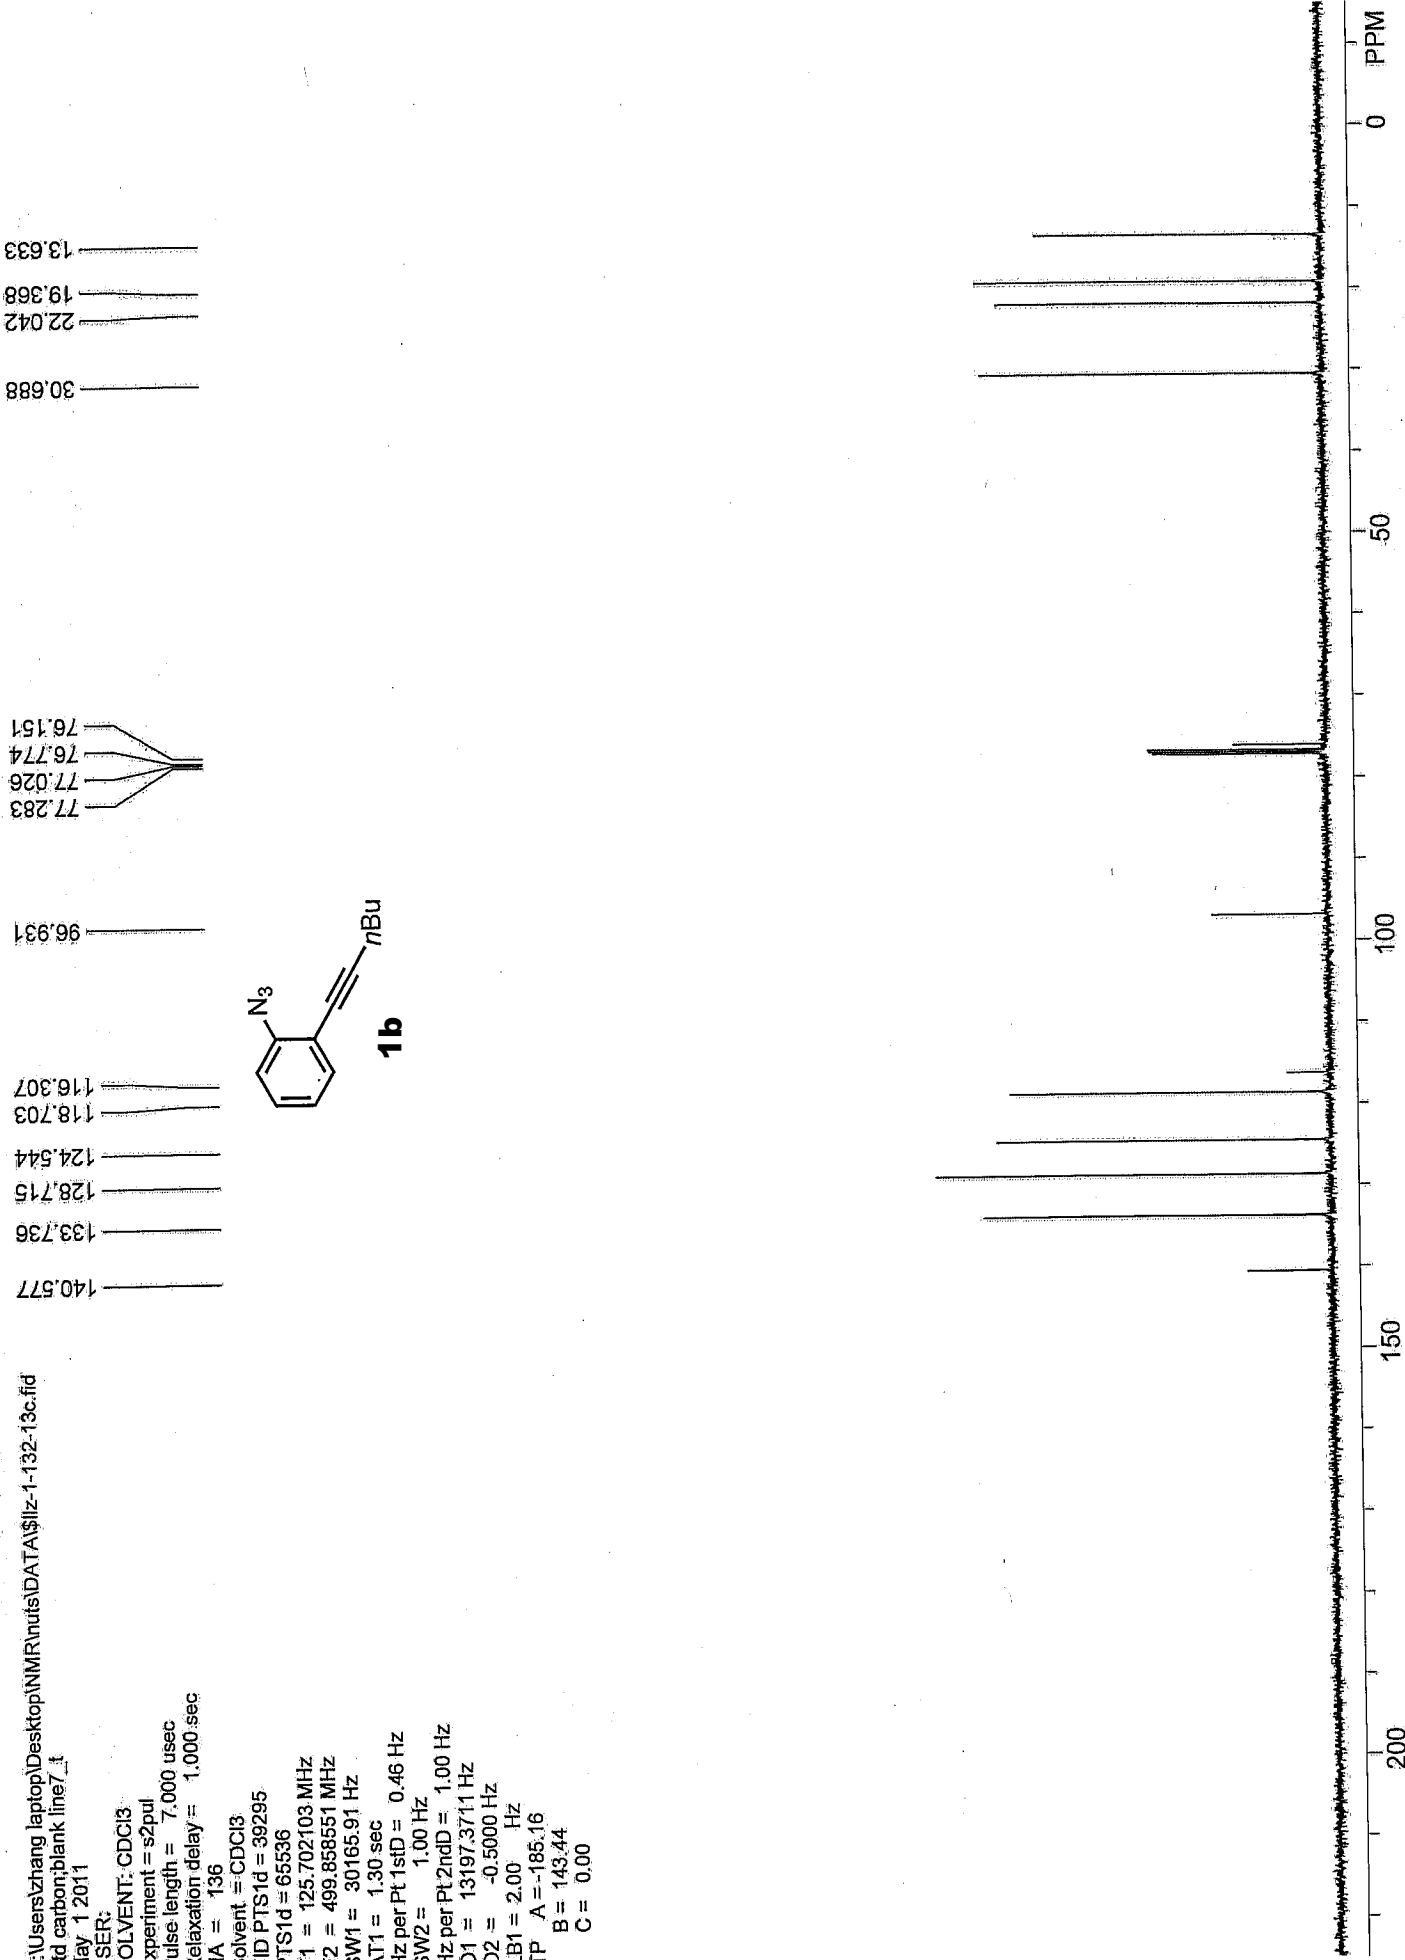

new experiment

exp1 s2pul

SAMPLE DEC. & VT  
date May 1 2011 dn Cl3  
solvent cdcl3 dof -1425.0  
file exp dm nnn  
ACQUISITION c  
sfrq 399.951 dmf 200  
tn H1 PROCESSING  
at 2.500 lb 0.20  
np 40012 fn 65536  
sw 8002.4 math i  
fb not used  
bs 2 werr  
pw 11.7 wexp  
pw 11.7 wbs  
tpwr 60 wnt  
d1 4.800 DISPLAY  
tof 0 sp -142.1  
nt 16 wp 3567.2  
ct 10 vs 78  
alock n sc 0  
gain not used wc 250  
FLAGS Hzmm 14.27  
il n fs 500.00  
in n rfl 1994.5  
dp y rfp 0  
hs nn th 5  
ins 2.000  
ai ph

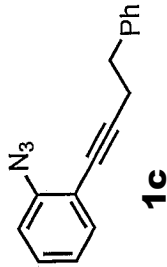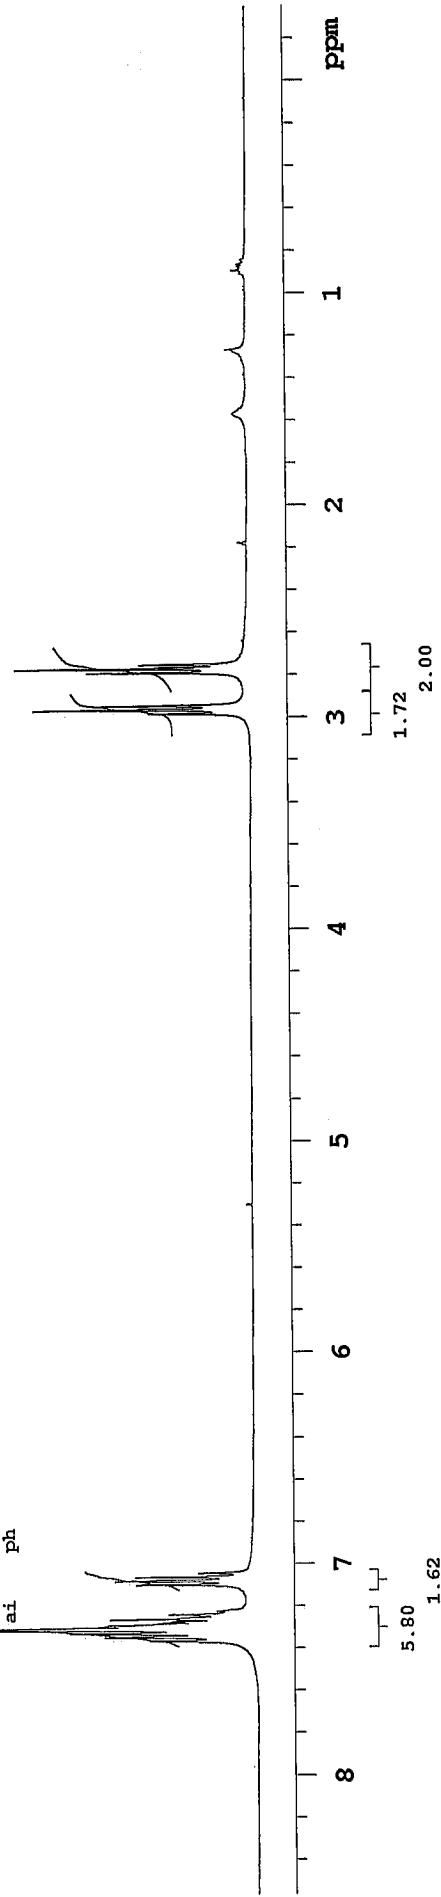

Standard c13 run using gcp probe

exp1 std13c

SAMPLE DEC. & VT  
date May 1 2011 dfrq 399.951  
solvent cdcl3 dn H1  
file exp dpwr 40  
ACQUISITION dof 0  
sfrq 100.577 dm YYY  
tn C13 dmm W  
at 1.000 dmf 6700  
np 56080 dseq  
sw 28040.7 dres 90.0  
fb not used homo n  
bs 4 PROCESSING  
ss 4 lb 1.00  
tpwr 58 wtfile  
pw 7.8 proc ft  
dl 1.300 fn 65536  
tof 525.7 math f  
nt 10000  
ct 328 werr  
alock n wexp  
gain 44 wbs  
wnt  
il n  
in n  
dp Y  
hs mn  
DISPLAY  
sp -1474.1  
wp 21389.0  
vs 11914  
sc 0  
wc 250  
hzmm 85.56  
is 500.00  
rfl 11708.8  
rfp 7743.7  
th 6  
ins 100.000  
ai ph

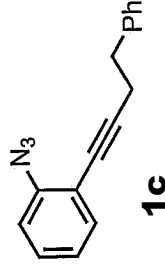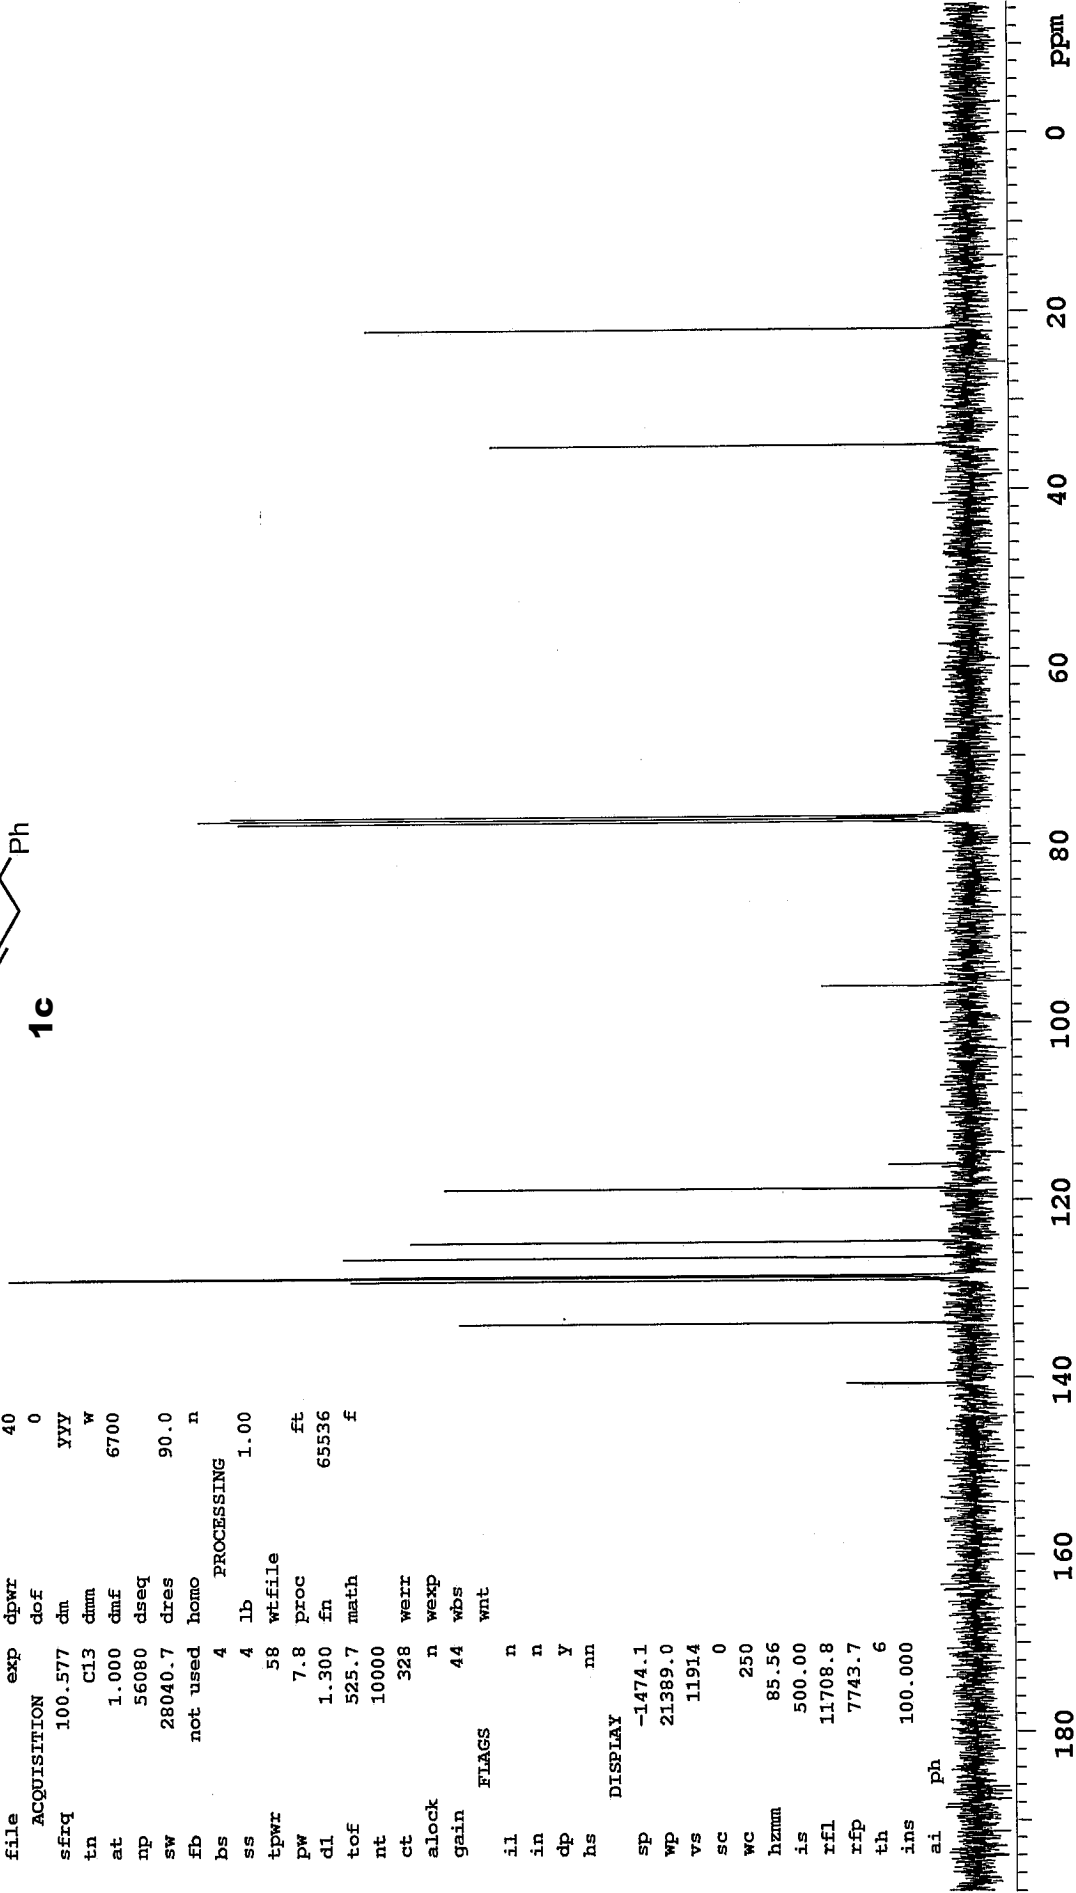

1b-III-249-2-C13

exp1 s2pul

SAMPLE DEC. & VT C13  
 date Apr 24 2011 dn  
 solvent CDCl3 dof 0  
 file /nmr500/Zhang~ dm nmn  
 /biaolu/1b-III-249~ dmm c  
 -2.fid dmf 200

ACQUISITION PROCESSING

sfrq 499.859 lb 0.20  
 tn H1 fn 32768  
 at 2.500 math i  
 np 42518  
 sw 8503.4 verr  
 fb not used wexp  
 bs 2 wbs  
 pw 7.7 wnt  
 pw 7.7 DISPLAY

tpwr 57 sp -516.1  
 dl 4.800 wp 5888.6  
 tof 0 vs 74  
 nt 32 sc 0  
 ct 14 wc 250  
 alock n hzmm 23.55  
 gain not used is 510.62  
 FLAGS rfi 1752.4

il n rfp 0  
 in n th 44  
 dp y ins 2.000  
 hs nn ai ph

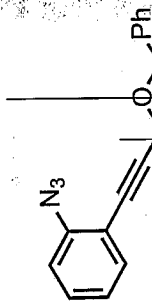

1d

10 9 8 7 6 5 4 3 2 1 -0 ppm

2.8831  
 2.651.92

1.99  
 2.00

1b-III-249-2-C13

expl Carbon

|                     |                |            |          |
|---------------------|----------------|------------|----------|
| date                | Apr 24 2011    | temp       | not used |
| solvent             | CDCl3          | gain       | 46       |
| file                | /nmr500/Zhang~ | spin       | not used |
| /biaolu/1b-III-249~ | hst            | 0.008      |          |
| -2-C13.fid          | pw90           | 14.600     |          |
| ACQUISITION         | alfa           | 6.600      |          |
| sw                  | 30165.9        | FLAGS      |          |
| at                  | 1.303          | il         | n        |
| np                  | 78590          | in         | n        |
| fb                  | not used       | dp         | Y        |
| bs                  | 4              | hs         | nn       |
| ss                  | 2              | PROCESSING |          |
| dl                  | 1.000          | lb         | 0.50     |
| nt                  | 10000          | fn         | not used |
| ct                  | 368            | DISPLAY    |          |
| TRANSMITTER         | sp             | -1159.2    |          |
| tn                  | C13            | wp         | 24774.5  |
| sfrq                | 125.702        | rfl        | 1885.6   |
| tof                 | 1285.5         | rpf        | 0        |
| tpwr                | 57             | rp         | -67.6    |
| pw                  | 7.000          | lp         | -102.9   |
| DECOUPLER           |                | PLOT       |          |
| dn                  | H1             | wc         | 250      |
| dof                 | 0              | sc         | 0        |
| dm                  | YY             | vs         | 5362     |
| dmm                 | w              | th         | 9        |
| dpwr                | 38             | ai         | cdc      |
| dmf                 | 10000          | ph         |          |

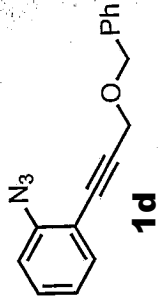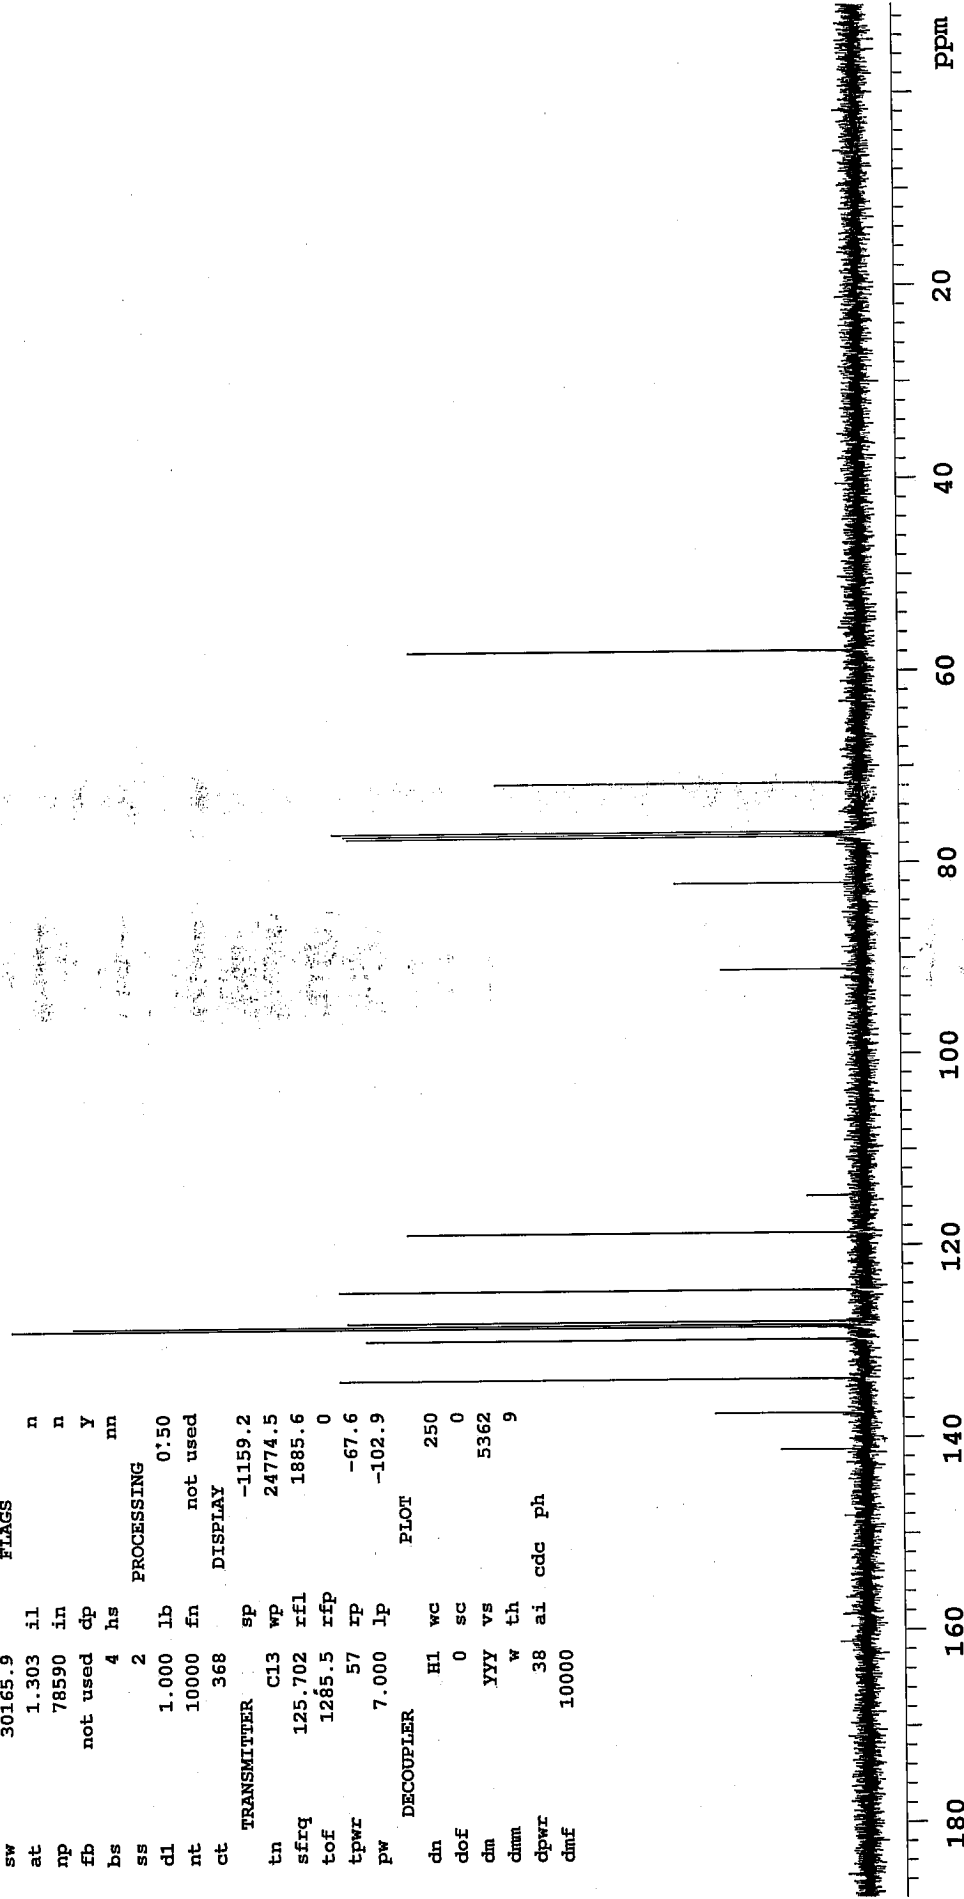

C:\Users\zhanglab1\Desktop\NMR\Ntus 20080731\DATA\1\$y\w-5-169-3ring-c1.fid

Apr 22 2011  
USER:  
SOLVENT: cdcl3  
Experiment = s2pul  
Pulse length = 7.775 usec  
Relaxation delay = 1.300 sec  
NA = 102  
Solvent = cdcl3  
FID P1S1d = 28040  
PTS1d = 32768  
F1 = 100.577232 MHz  
F2 = 399.950684 MHz  
SW1 = 28040.66 Hz  
AT1 = 1.00 sec  
Hz per Pt 1s1d = 0.86 Hz  
SW2 = 1.00 Hz  
Hz per Pt 2ndD = 1.00 Hz  
O1 = 10052.9395 Hz  
O2 = -0.3000 Hz  
LB1 = 2.00 Hz  
TP A = -28.59  
B = 4.22  
C = 0.00

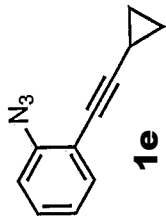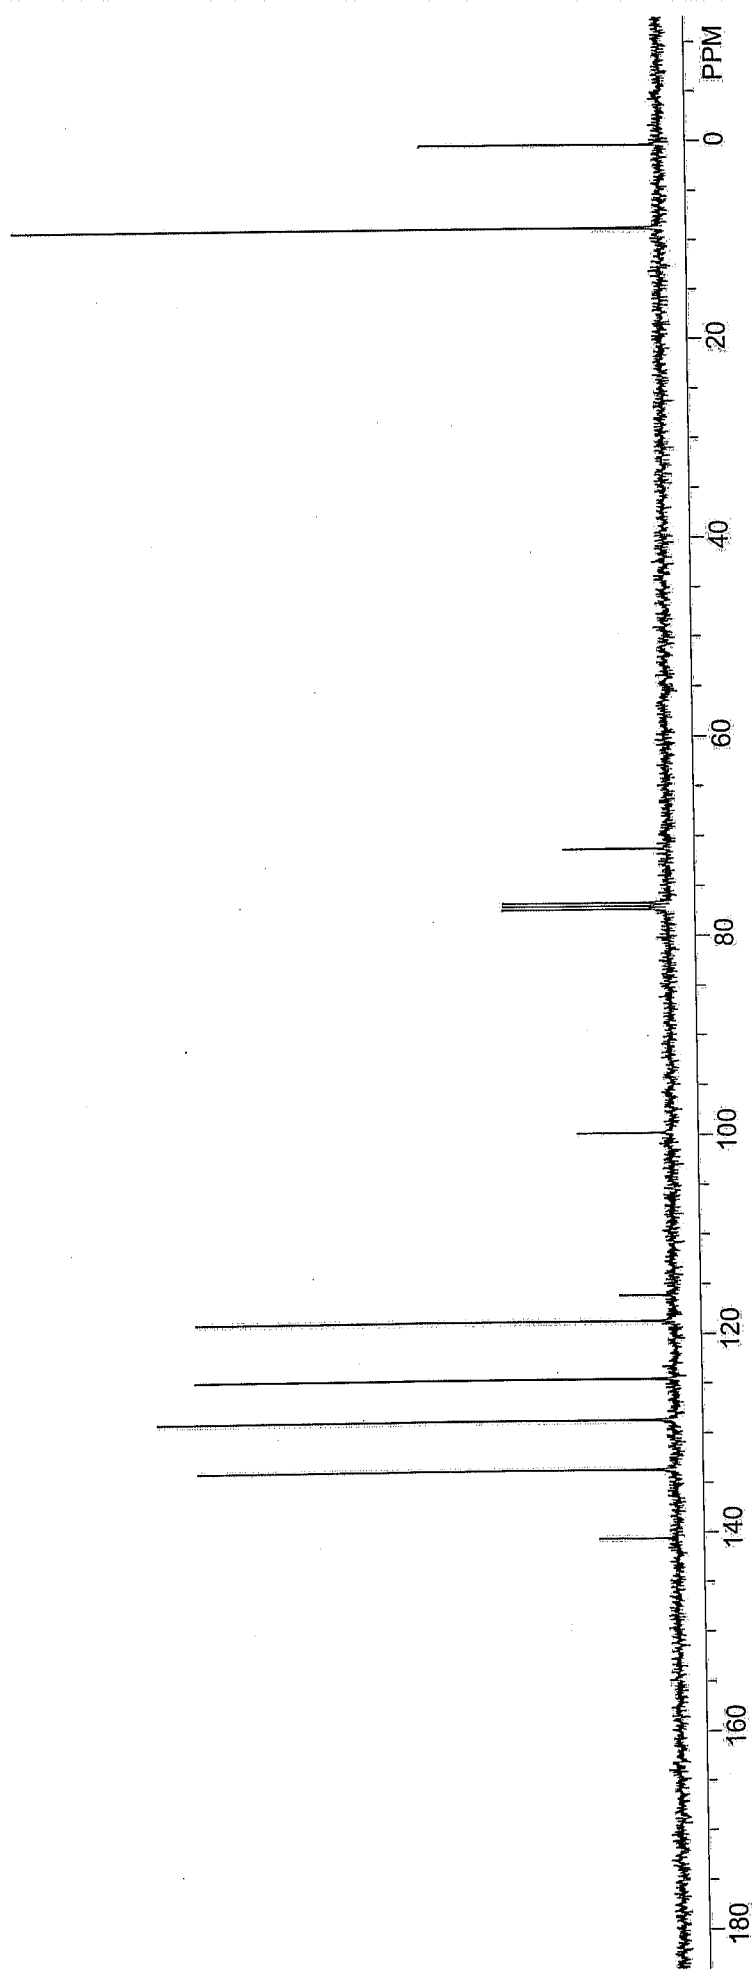

C:\Users\zhanglab1\Desktop\NMR\Nius 20080731\DATA\5-169-3ring.fid  
new experiment  
Apr. 22 2011

USER:  
SOLVENT: cdcl3  
Experiment = s2pul  
Pulse length = 11.663 usec  
Relaxation delay = 4.800 sec  
NA = 10  
Solvent = cdcl3  
FID PTS1d = 20006  
PTS1d = 32768  
F1 = 399.950684 MHz  
F2 = 100.575279 MHz  
SW1 = 8002.40 Hz  
AT1 = 2.50 sec  
Hz per Pt 1stD = 0.24 Hz  
SW2 = 1.00 Hz  
Hz per Pt 2ndD = 1.00 Hz  
O1 = 2006.7504 Hz  
O2 = -0.5000 Hz  
LB1 = 0.00 Hz  
TP A = -46.11  
B = -36.81  
C = 0.00

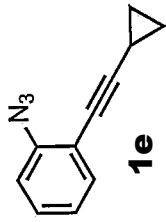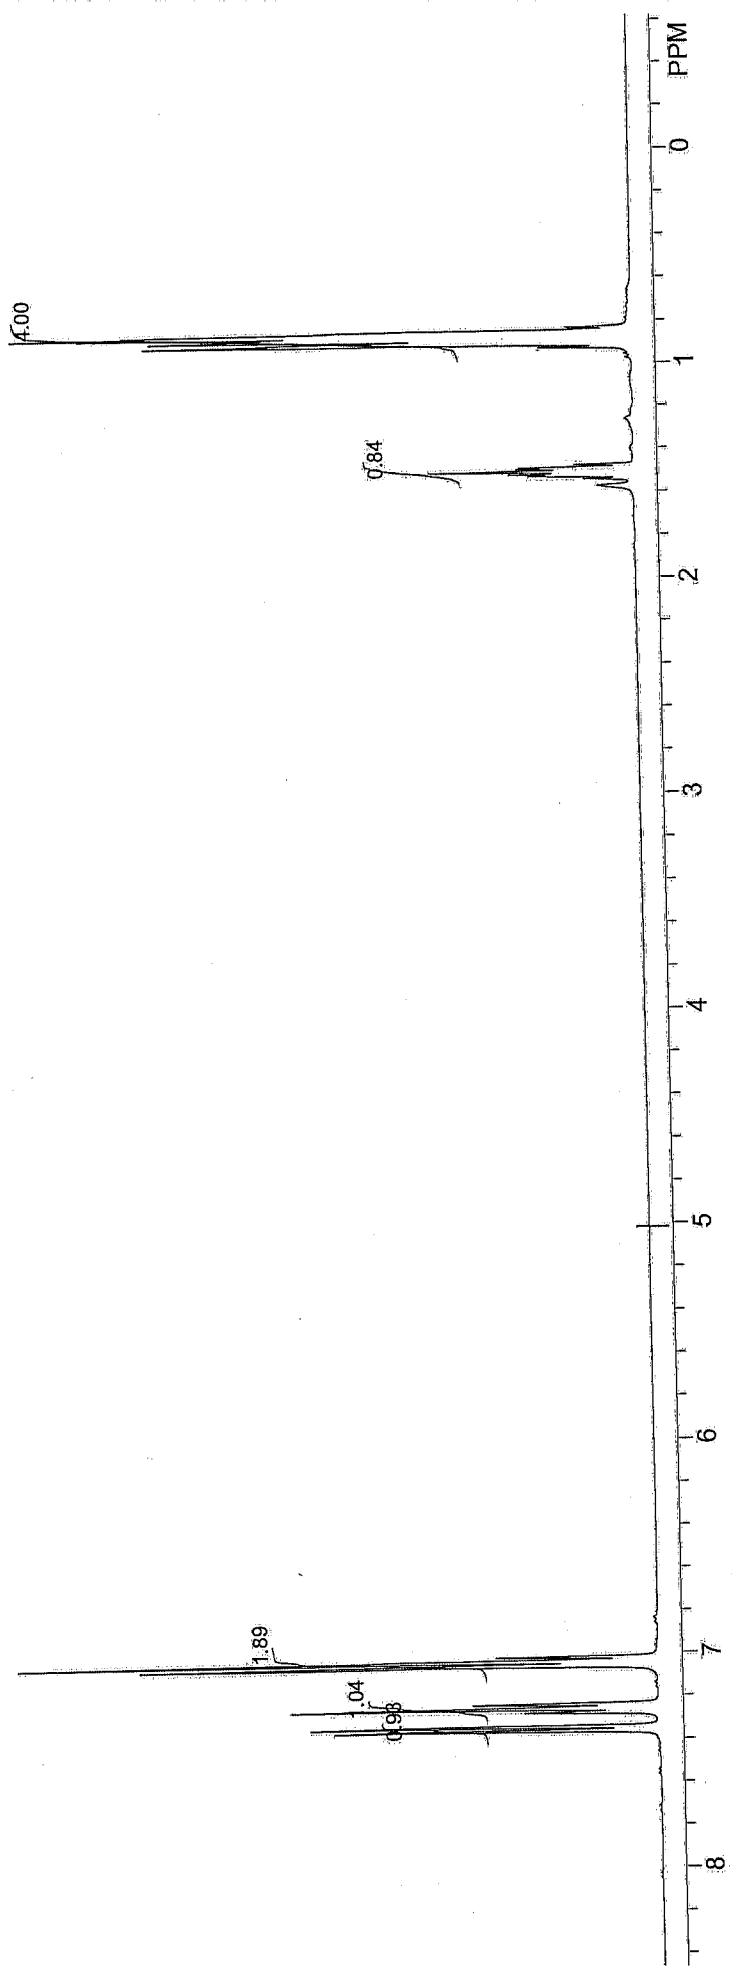

Apr 22 2011

USER:  
SOLVENT: cdcl3  
Experiment = s2pul  
Pulse length = 7.775 usec  
Relaxation delay = 1.300 sec  
NA = 74  
Solvent = cdcl3  
FID PTS1d = 28040  
PTS1d = 32768  
F1 = 100.577232 MHz  
F2 = 399.950684 MHz  
SW1 = 28040.66 Hz  
AT1 = 1.00 sec  
Hz per Pt 1stD = 0.86 Hz  
SW2 = 1.00 Hz  
Hz per Pt 2ndD = 1.00 Hz  
O1 = 10044.3818 Hz  
O2 = -0.5000 Hz  
LB1 = 2.00 Hz  
TP A = -37.97  
B = 22.50  
C = 0.00

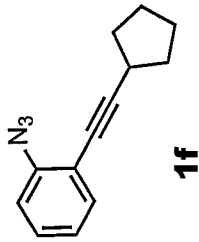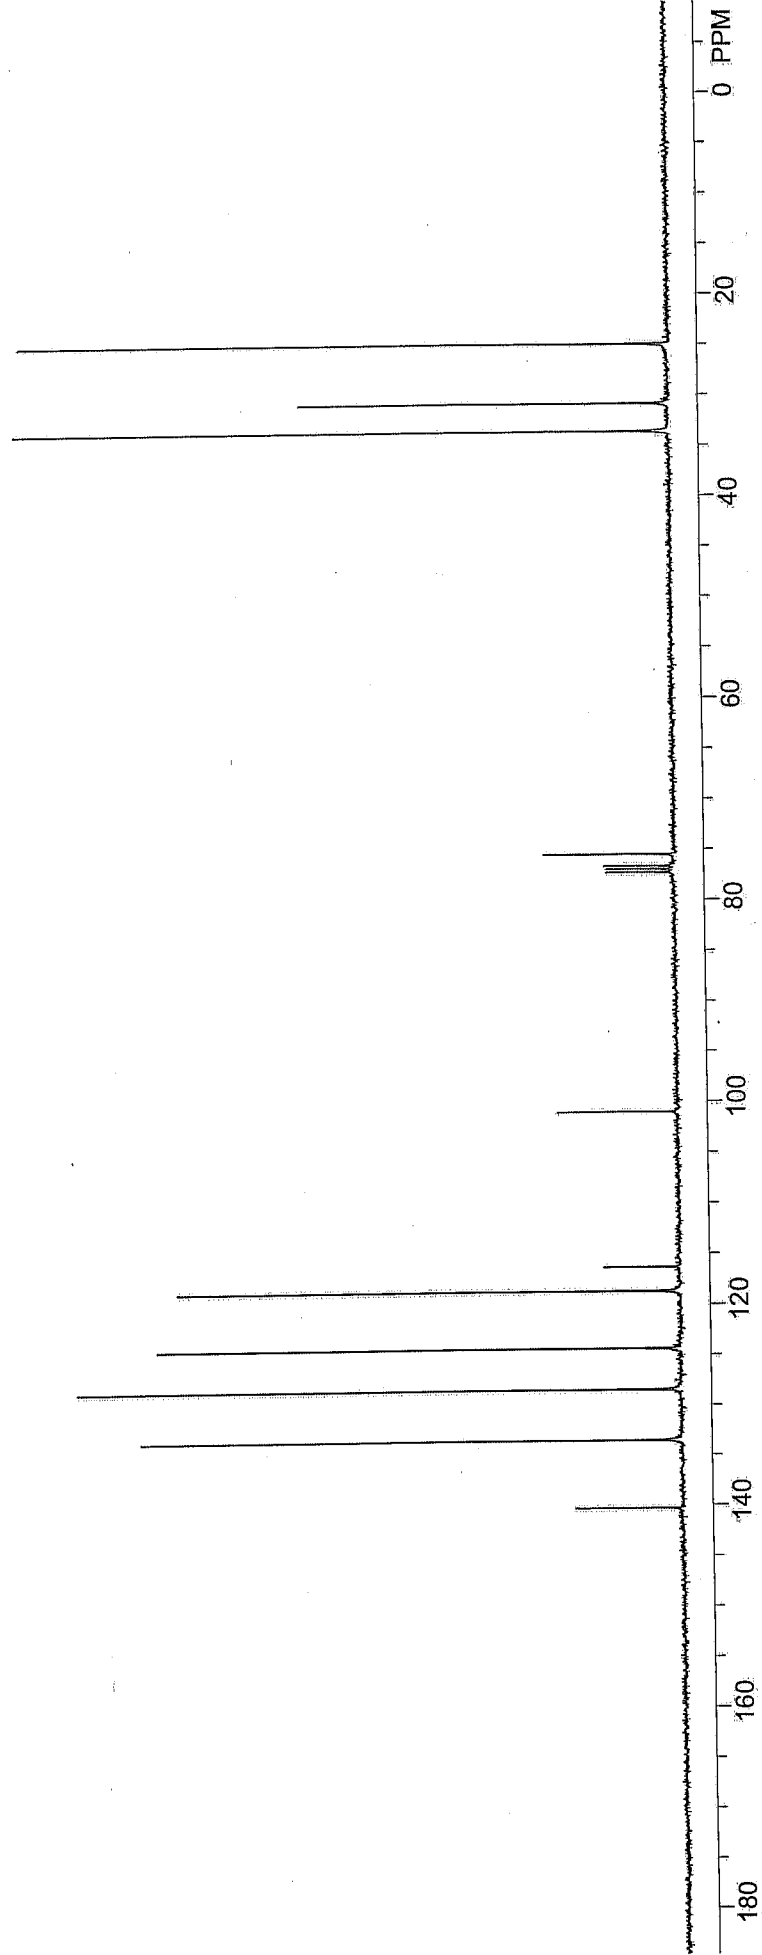



Apr 22 2011

USER:

SOLVENT: cdcl3

Experiment = s2pul

Pulse length = 11.663 usec

Relaxation delay = 4.800 sec

NA = 6

Solvent = cdcl3

FID PTS1d = 20006

PTS1d = 32768

F1 = 399.950684 MHz

F2 = 100.575279 MHz

SW1 = 8002.40 Hz

AT1 = 2.50 sec

Hz per Pt 1stD = 0.24 Hz

SW2 = 1.00 Hz

Hz per Pt 2ndD = 1.00 Hz

O1 = 2006.7504 Hz

O2 = -0.5000 Hz

LB1 = 0.00 Hz

TP A = 48.09

B = -26.16

C = 0.00

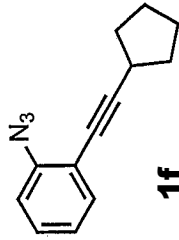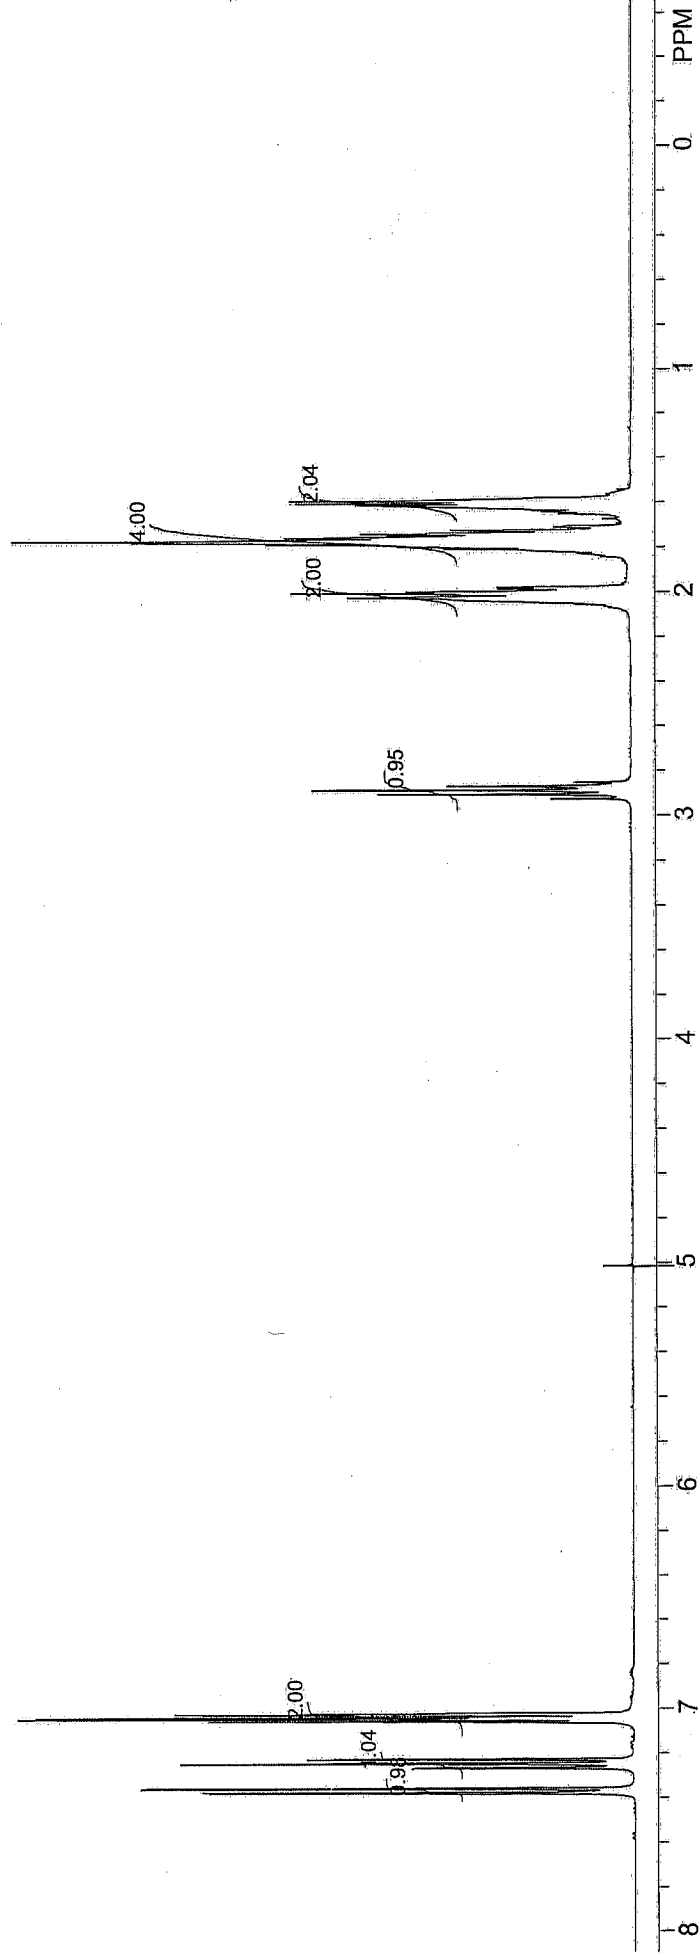

C:\Users\zhnglab1\Desktop\NMR\Ntus 20080731\DATA\lyd-1-274-2.fid

lyd-1-274-2

Apr 23 2011

USER:

SOLVENT: cdcl3

Experiment = s2pul

Pulse length = 5.825 usec

Relaxation delay = 4.800 sec

NA = 12

Solvent = cdcl3

FID PTS1d = 25000

PTS1d = 32768

F1 = 599.634705 MHz

F2 = 599.635132 MHz

SW1 = 10000.00 Hz

AT1 = 2.50 sec

Hz per Pt 1stD = 0.31 Hz

SW2 = 1.00 Hz

Hz per Pt 2ndD = 1.00 Hz

O1 = 2605.6868 Hz

O2 = -0.5000 Hz

LB1 = 0.00 Hz

TP A = -134.06

B = 3.52

C = 0.00

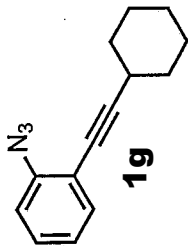

**19**

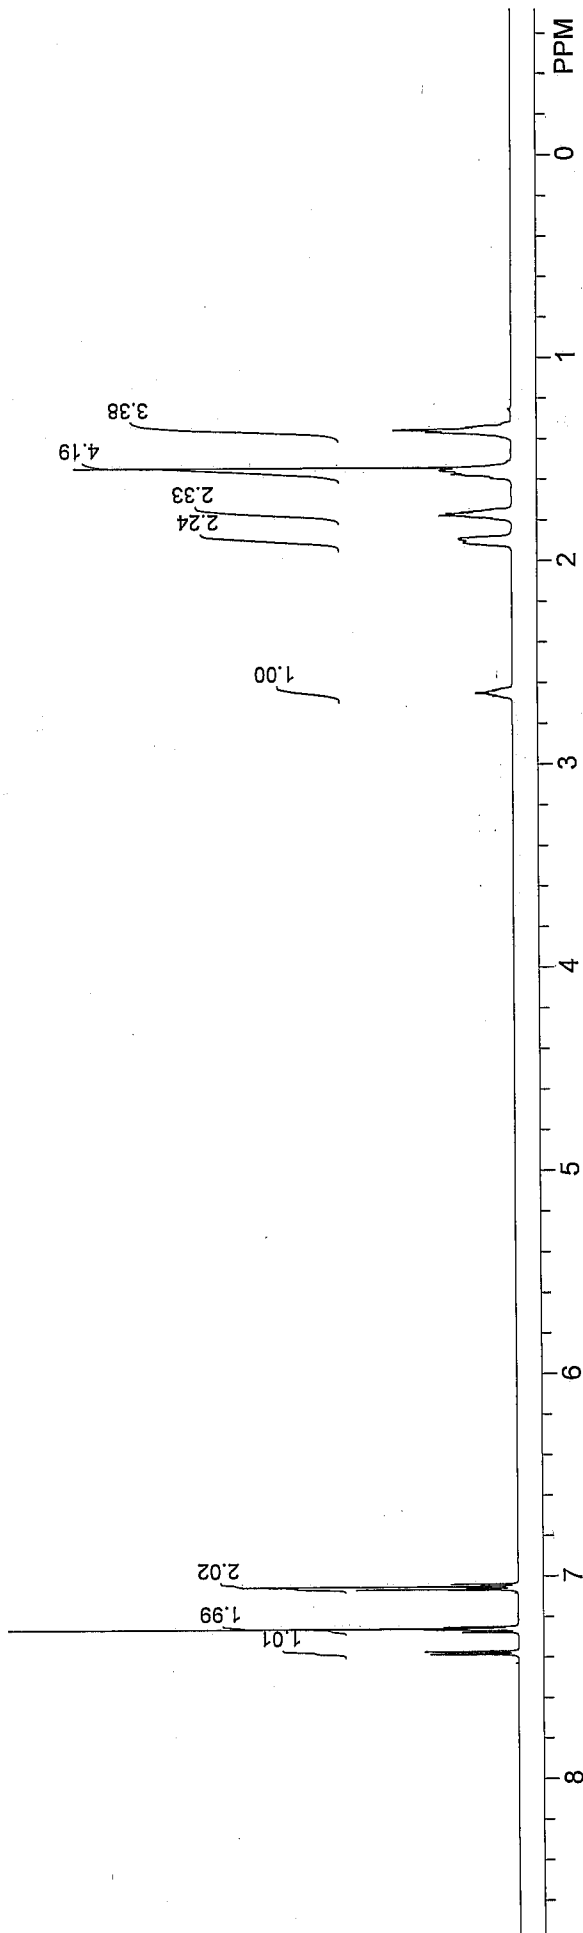

lyd-1-274-2-C

Sample: 1\_Indanone  
File: nmr600/Zhang/yluo/lyd-1-274-2-C.fid

Pulse Sequence: s2pul

Solvent: cdcl3  
Temp. 25.0 C / 298.1 K  
Operator: yluc  
File: lyd-1-274-2-C  
INNOVA-500 "nmrserver"

Relax. delay 1.000 sec  
Pulse 10.0 usec  
Acq. time 1.298 sec  
Width 36231.9 Hz  
1248 repetitions  
OBSERVE C13, 150.7776170 MHz  
DECOUPLE H1, 599.6351203 MHz  
Power 34 dB  
continuously on  
WALTZ-16 modulated  
DATA PROCESSING  
Line broadening 0.5 Hz  
FT size 131072  
Total time 7 hr, 41 min, 54 sec

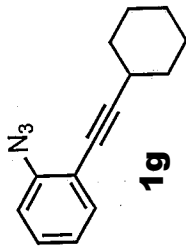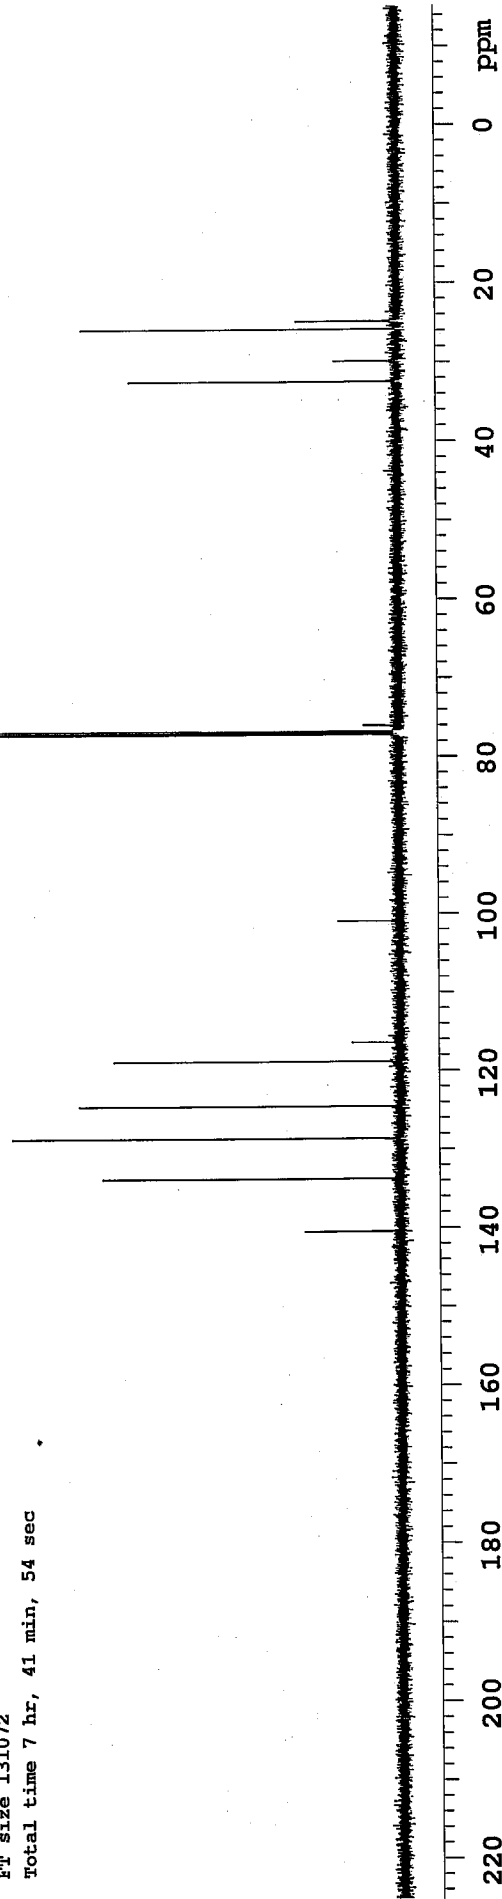

C:\Users\zhanglab1\Desktop\NMR\Nitus 20080731\DATA\lyd-1-274-1.fid

lyd-1-274-1

Apr 23 2011

USER:

SOLVENT: cdcl3

Experiment = s2pul

Pulse length = 5.825 usec

Relaxation delay = 4.800 sec

NA = 8

Solvent = cdcl3

FID PTS1d = 25000

PTS1d = 32768

F1 = 599.634705 MHz

F2 = 599.635132 MHz

SW1 = 10000.00 Hz

AT1 = 2.50 sec

Hz per Pt 1stD = 0.31 Hz

SW2 = 1.00 Hz

Hz per Pt 2ndD = 1.00 Hz

O1 = 2605.6868 Hz

O2 = -0.5000 Hz

LB1 = 0.00 Hz

TP A = -138.63

B = 4.57

C = 0.00

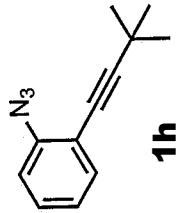

00'6

1.75  
1.04  
0.88

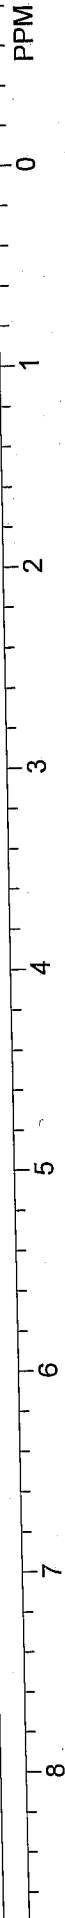

lyd-1-274-1-C

Sample: 1\_Indanone  
File: nmr600/Zhang/yluo/lyd-1-274-1-C.fid

Pulse Sequence: s2pul

Solvent: cdcl3  
Temp. 25.0 C / 298.1 K  
Operator: yluc  
File: lyd-1-274-1-C  
INNOVA-500 "nmrserver"

Relax. delay 1.000 sec  
Pulse 10.0 usec  
Acq. time 1.298 sec  
Width 36231.9 Hz  
68 repetitions  
OBSERVE C13, 150.7776170 MHZ  
DECOUPLE H1, 599.6351203 MHZ  
Power 34 dB  
continuously on  
WALTZ-16 modulated  
DATA PROCESSING  
Line broadening 0.5 Hz  
FT size 131072  
Total time 7 hr, 41 min, 54 sec

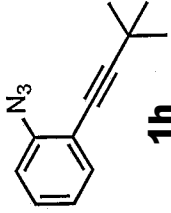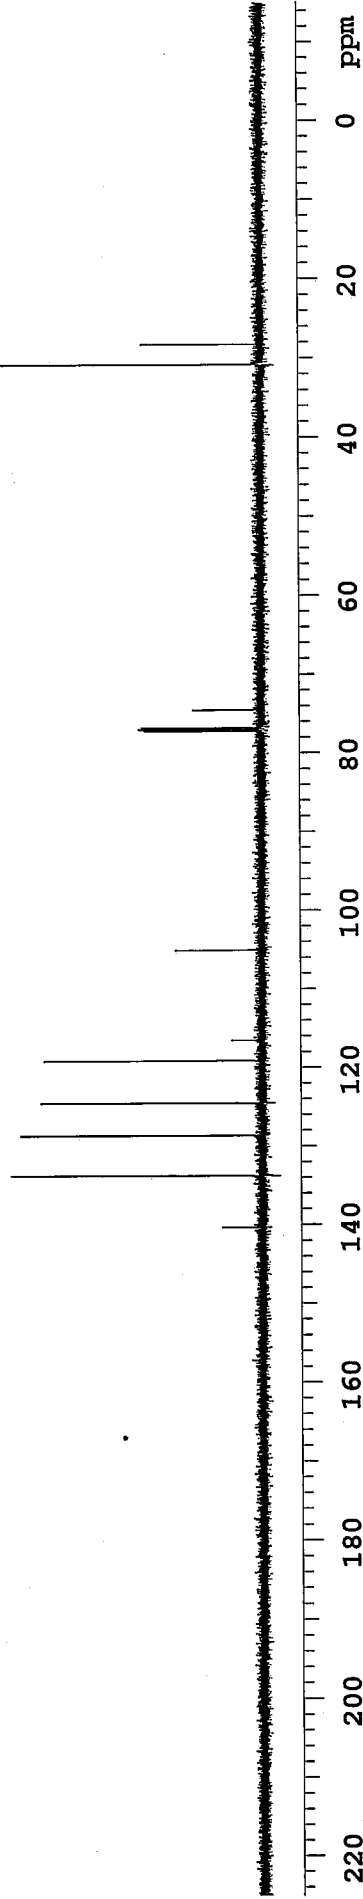

C:\Users\zhang\_laptop\Desktop\NMR\ndts\DATA\1z-1-139-1h.fid

new\_experimentU

Apr 24 2011

USER:

SOLVENT: cdcl3

Experiment = s2pul

Pulse length = 11.663 usec

Relaxation delay = 4.800 sec

NA = 16

Solvent = cdcl3

FID.PTS1d = 20006

PTS1d = 32768

F1 = 399.950684 MHz

F2 = 100.575279 MHz

SW1 = 8002.40 Hz

AT1 = 2.50 sec

Hz per Pt 1stD = 0.24 Hz

SW2 = 1.00 Hz

Hz per Pt 2ndD = 1.00 Hz

O1 = 2006.7504 Hz

O2 = -0.5000 Hz

LB1 = 0.00 Hz

TP A = -33.20

B = -50.92

C = 0.00

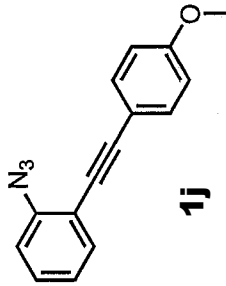

3.00

2.78

0.95

1.82

1.97

PPM



1b-IV-17

exp1 s2pul

SAMPLE DEC. & VT  
 date Apr 24 2011 dn C13  
 solvent CDCl3 dof 0  
 file /nmr500/Zhang~ dm nnn  
 /biaolu/lb-IV-17.f~ dnm c  
 id dmf 200

ACQUISITION PROCESSING  
 sfrq 499.859 lb 0.20  
 tn HI fn 32768 i

at 2.500 math  
 np 42518  
 sw 8503.4 werr  
 fb not used wexp  
 bs 2 wbs  
 pw 7.7 wnt  
 pw 7.7

DISPLAY  
 tpwr 57 sp -358.4  
 dl 4.800 wp 6117.0  
 tof 0 vs 101  
 nt 32 sc 0  
 ct 30 wc 250  
 alock n hzmm 24:47  
 gain not used is 687.03  
 FLAGS rfl 1752.4

il n rfp 0  
 in n th 6  
 dp y ins 3.000  
 hs nn ai ph

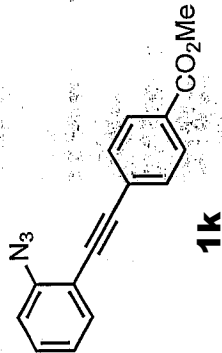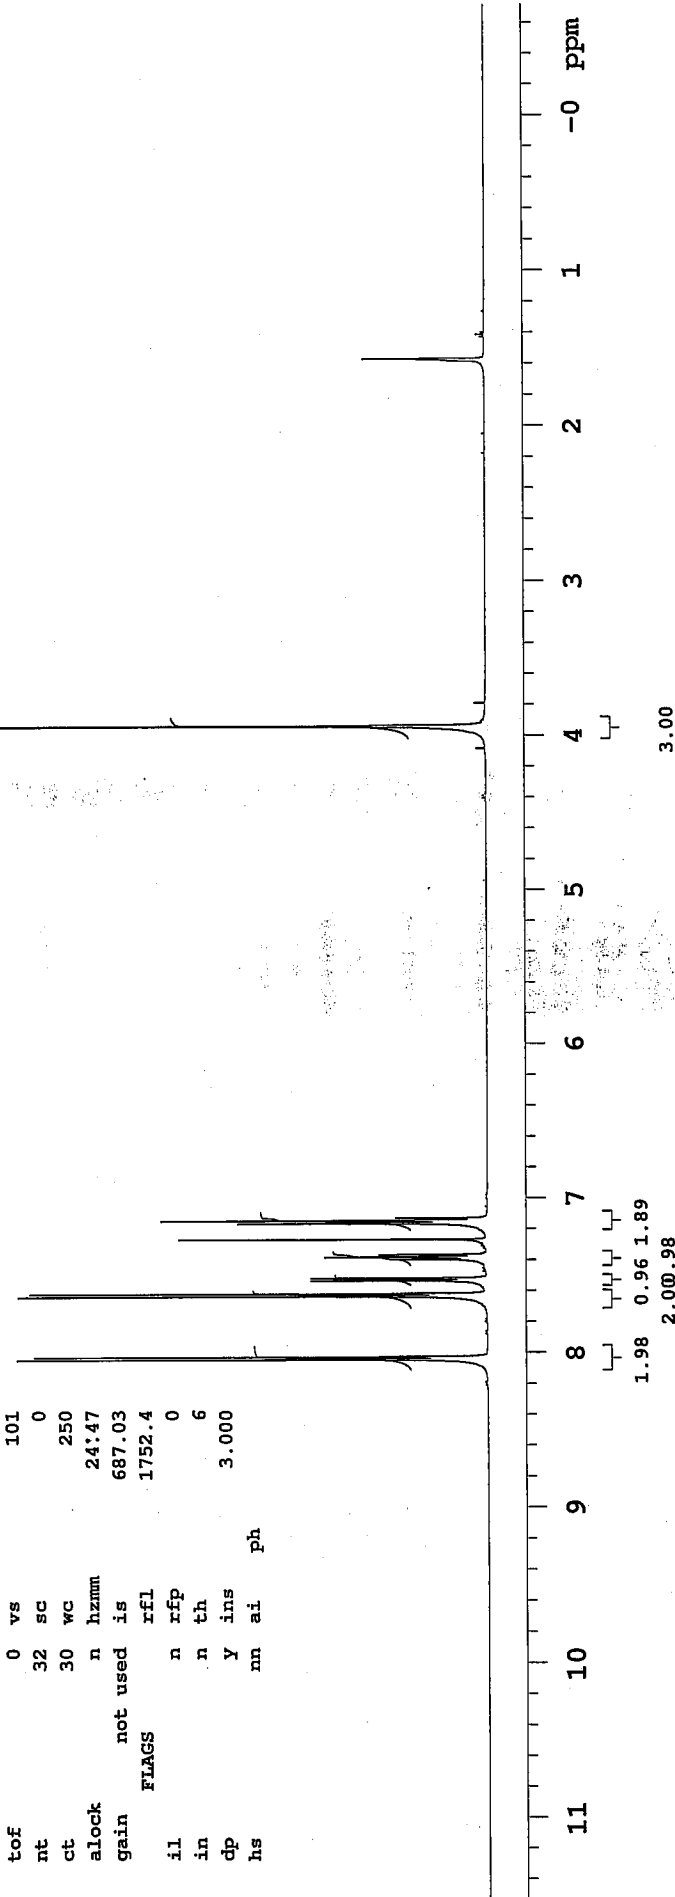

11 10 9 8 7 6 5 4 3 2 1 -0 ppm

1.98 0.96 1.89  
2.00 0.98

3.00



1b-IV-17-C13

exp1 Carbon

|                     |                |            |          |         |
|---------------------|----------------|------------|----------|---------|
| date                | Apr 24 2011    | temp       | not used | SPECIAL |
| solvent             | CDC13          | gain       | 46       |         |
| file                | /nmr500/Zhang~ | spin       | not used |         |
| /biao1v/1b-IV-17-C~ | hst            | 0.008      |          |         |
|                     | 13.fid         | pw90       | 14.600   |         |
|                     | alpha          |            | 6.600    |         |
| sw                  | 30165.9        | FLAGS      |          |         |
| at                  | 1.303          | il         | n        |         |
| np                  | 78590          | in         | n        |         |
| fb                  | not used       | dp         | y        |         |
| bs                  | 4              | hs         | nn       |         |
| ss                  | 2              | PROCESSING |          |         |
| dl                  | 1.000          | lb         | 0.50     |         |
| nt                  | 100000         | fn         | not used |         |
| ct                  | 180            | DISPLAY    |          |         |
| TRANSMITTER         |                | sp         | -432.9   |         |
| tn                  | C13            | wp         | 25975.4  |         |
| sfrq                | 125.702        | rfl        | 1885.6   |         |
| tof                 | 1285.5         | ifp        | 0        |         |
| tpwr                | 57             | fp         | -64.0    |         |
| pw                  | 7.000          | lp         | -159.1   |         |
| DECOUPLER           |                | PLOT       |          |         |
| dn                  | H1             | wc         | 250      |         |
| dof                 | 0              | sc         | 0        |         |
| dm                  | YY             | vs         | 4916     |         |
| dmm                 | w              | th         | 12       |         |
| dpwr                | 38             | ai         | cdc      |         |
| dmf                 | 10000          | ph         |          |         |

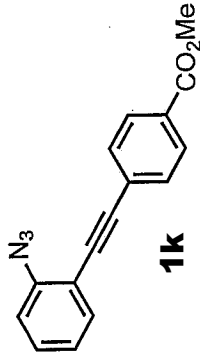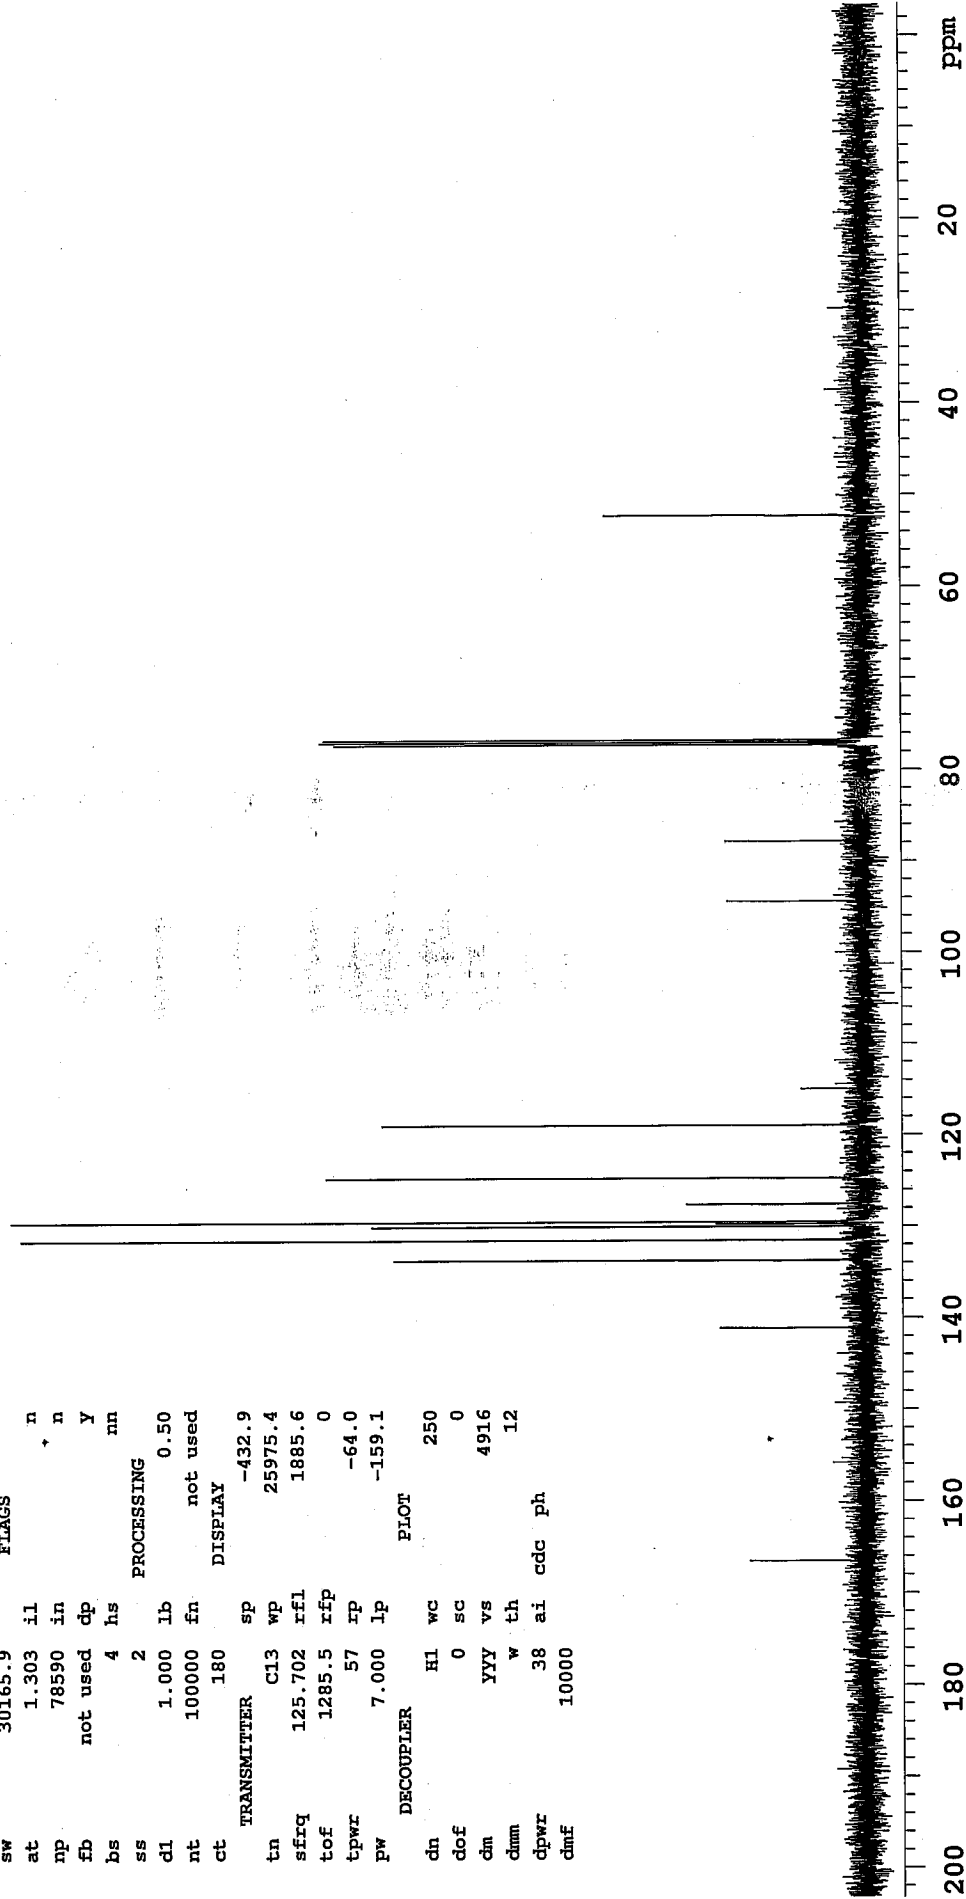

D:\Greenware\Ntus 20080731\DATA\swyz3-253-pro.fid

new experiment

Apr 28 2011

USER:

SOLVENT: cdcl3

Experiment name:

Path = 11.663.usac

Relaxation delay = 1.000 sec

NA = 20

Solvent = cdcl3

FID PTS1d = 20006

PTS1d = 32768

F1 = 399.950684 MHz

F2 = 100.575279 MHz

SWM = 8002.40 Hz

AT1 = 2.50 sec

Hz per PTS1d = 0.24 Hz

1.00 Hz

Hz per F1 = 0.00 Hz

0.00 Hz

2005.9918 Hz

0.00 Hz

LB1 = 0.00 Hz

TP A = -43.23

B = -31.55

C = 0.00

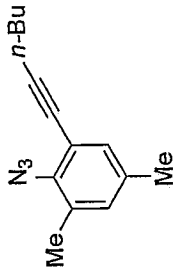

11

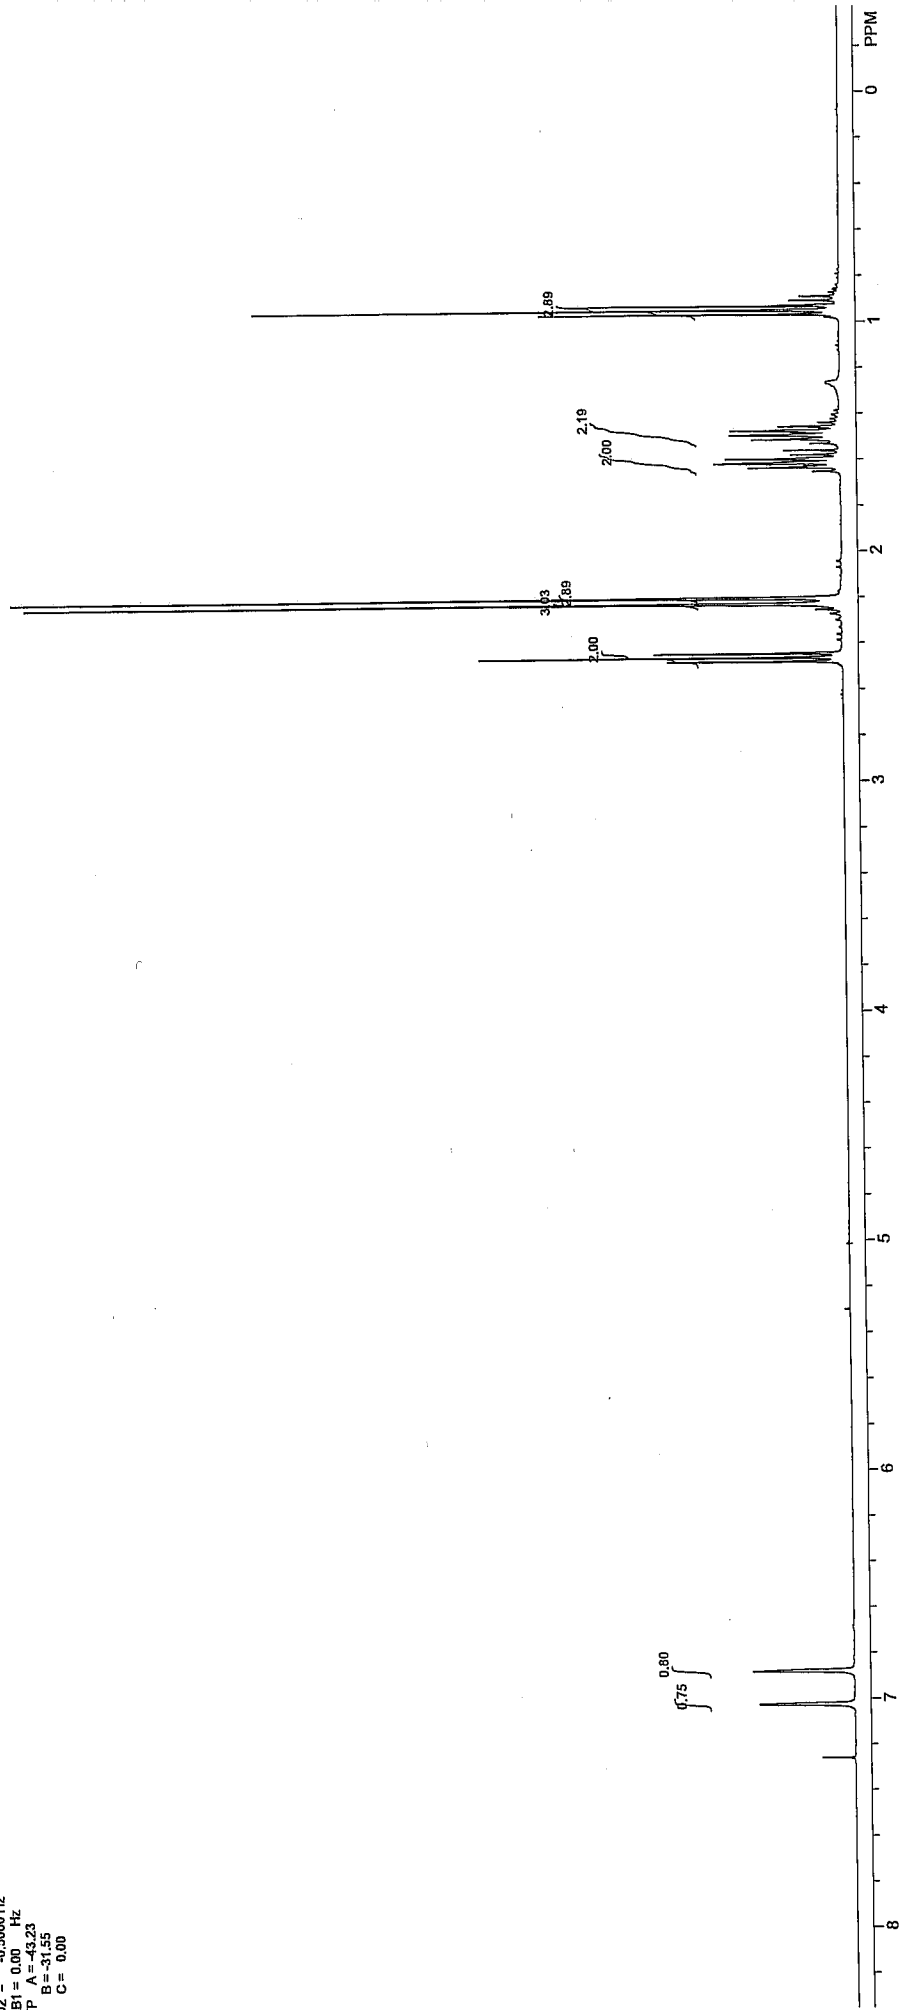

D:\Greenware\Ntuc\_20080731\DATA\S\wyz3-253-pro-c13.fid  
Standard c13 run using qnp probe  
Apr 28 2011

NAME =  
SOLVENT = cdcl3  
Experiment = s2nfl  
Pulse length = 7.775 usec  
Relaxation delay = 1.300 sec  
NA = 100  
Solvent = cdcl3  
FID PTS1d = 28040  
PTS1d = 32768  
F2 = 399.90664 MHz  
SMT = 28040.66 Hz  
AT1 = 1.00 sec  
S2 per PT = 0.86 Hz  
SVM = 100 Hz  
HPC PR 2ndD = 1.00 Hz  
O1 = 10055.5039 Hz  
O2 = -0.5000 Hz  
LB1 = 2.00 Hz  
TP A = -30.47  
B = 11.25  
C = 0.00

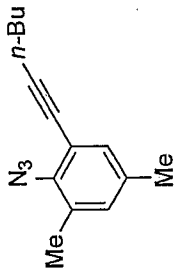

11

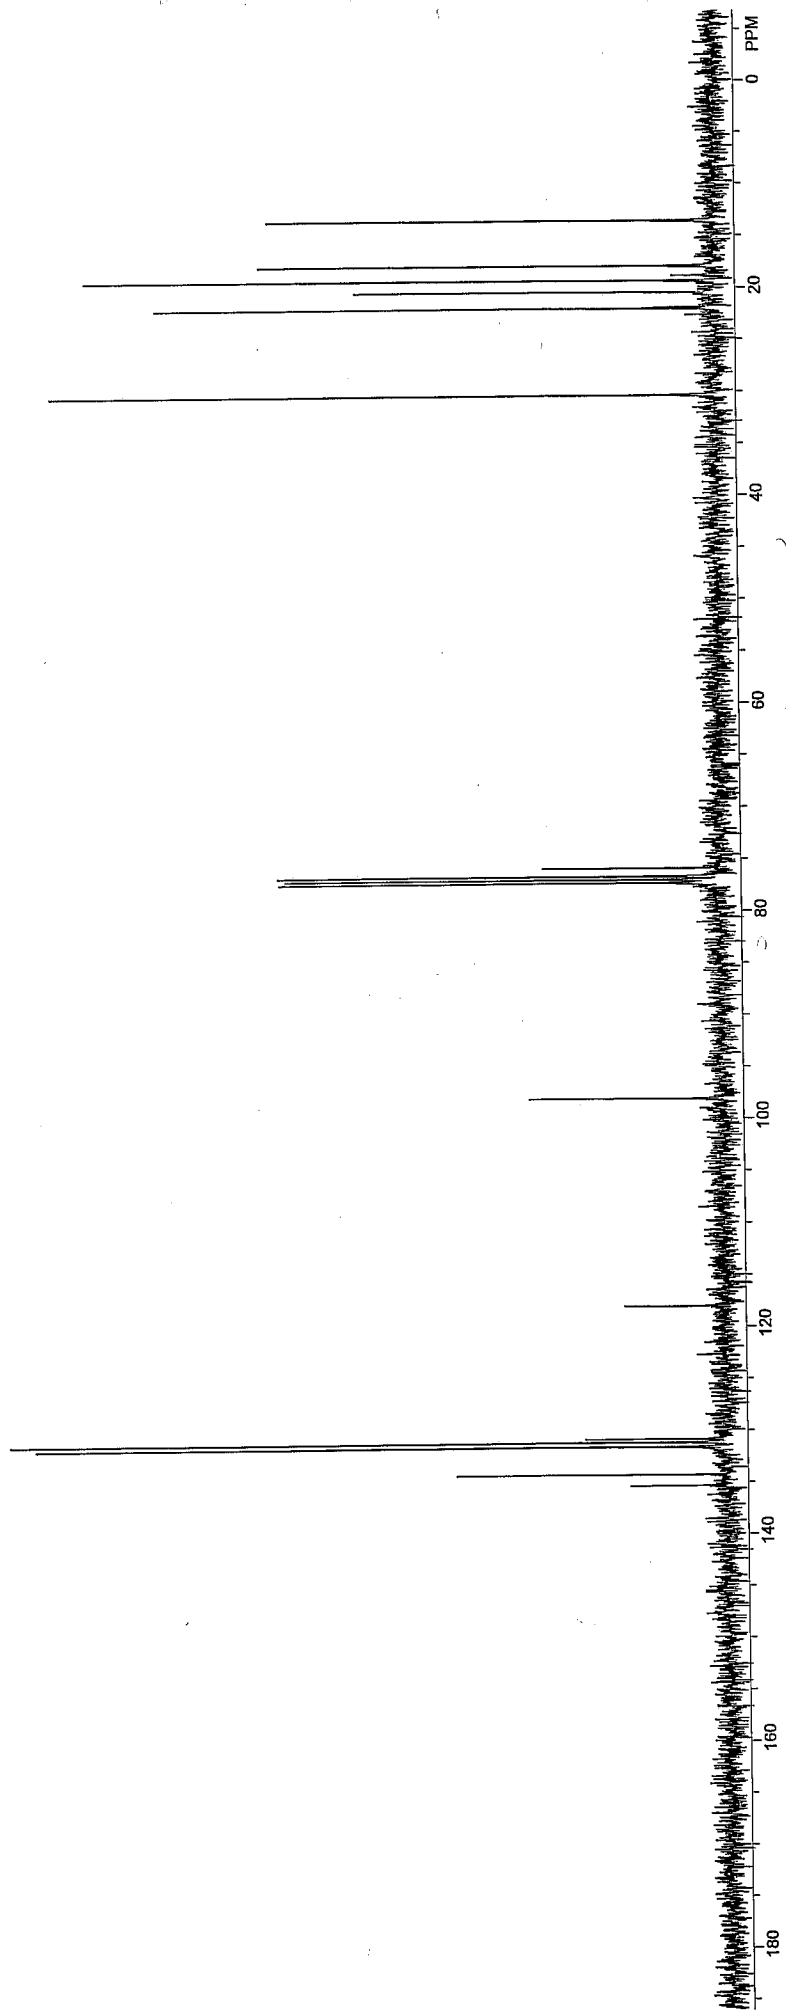

1b-IV-37

exp1 s2pul

|             |            |            |         |
|-------------|------------|------------|---------|
| SAMPLE      |            | DEC. & VT  |         |
| date        | May 1 2011 | dn         | C13     |
| solvent     | cdcl3      | dof        | -1425.0 |
| file        | exp        | dm         | nnn     |
| ACQUISITION |            | chmm       | c       |
| sfrq        | 399.951    | dmf        | 200     |
| tn          | H1         | PROCESSING |         |
| at          | 2.500      | lb         | 0.20    |
| np          | 40012      | fn         | 65536   |
| sw          | 8002.4     | math       | i       |
| fb          | not used   |            |         |
| bs          | 2          | werr       |         |
| pw          | 11.7       | wexp       |         |
| pw          | 11.7       | wbs        |         |
| tpwr        | 60         | wnt        |         |
| dl          | 4.800      | DISPLAY    |         |
| tof         | 0          | sp         | -533.6  |
| nt          | 16         | wp         | 4362.9  |
| ct          | 16         | vs         | 219     |
| alock       | n          | sc         | 0       |
| gain        | not used   | wc         | 250     |
| FLAGS       |            | hzmm       | 17.45   |
| il          | n          | is         | 500.00  |
| in          | n          | rfl        | 1994.5  |
| dp          | y          | rfl        | 0       |
| hs          | nn         | th         | 5       |
|             |            | ins        | 2.000   |
|             |            | ai         | ph      |

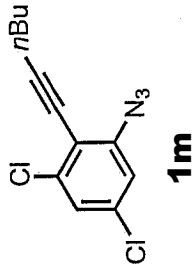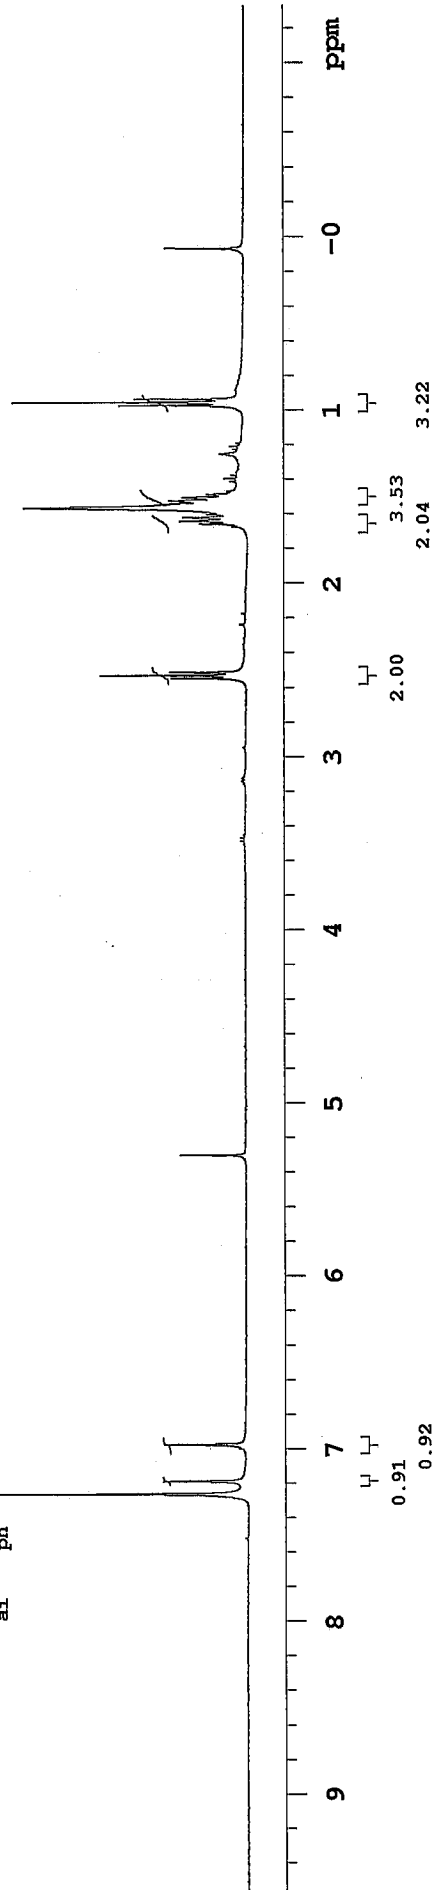

Standard c13 run using qnp probe

exp1 std13c

SAMPLE DEC. & VT  
date May 1 2011 dfrq 399.951  
solvent cdcl3 dn H1  
file exp dpwr 40  
ACQUISITION dof 0  
sfrq 100.577 dm YVY  
tn C13 dnm w  
at 1.000 dmf 6700  
np 56080 dseq  
sw 28040.7 dres 90.0  
fb not used homo n  
bs 4 PROCESSING  
ss 4 lb 1.00  
tpwr 58 wtfile  
pw 7.8 proc ft  
dl 1.300 fn 65536  
tof 525.7 math f  
nt 10000  
ct 248 werr  
alock n wexp  
gain 44 wbs  
FLAGS wnt

il n  
in n  
dp Y  
hs nn

DISPLAY

sp -1084.9  
wp 21572.2  
vs 5863  
sc 0  
wc 250  
hzmm 86.29  
is 500.00  
rfl 11708.1  
rfp 7743.7  
th 6  
ins 100.000  
ai ph

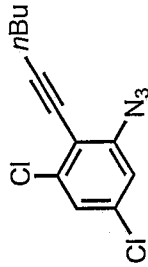

1m

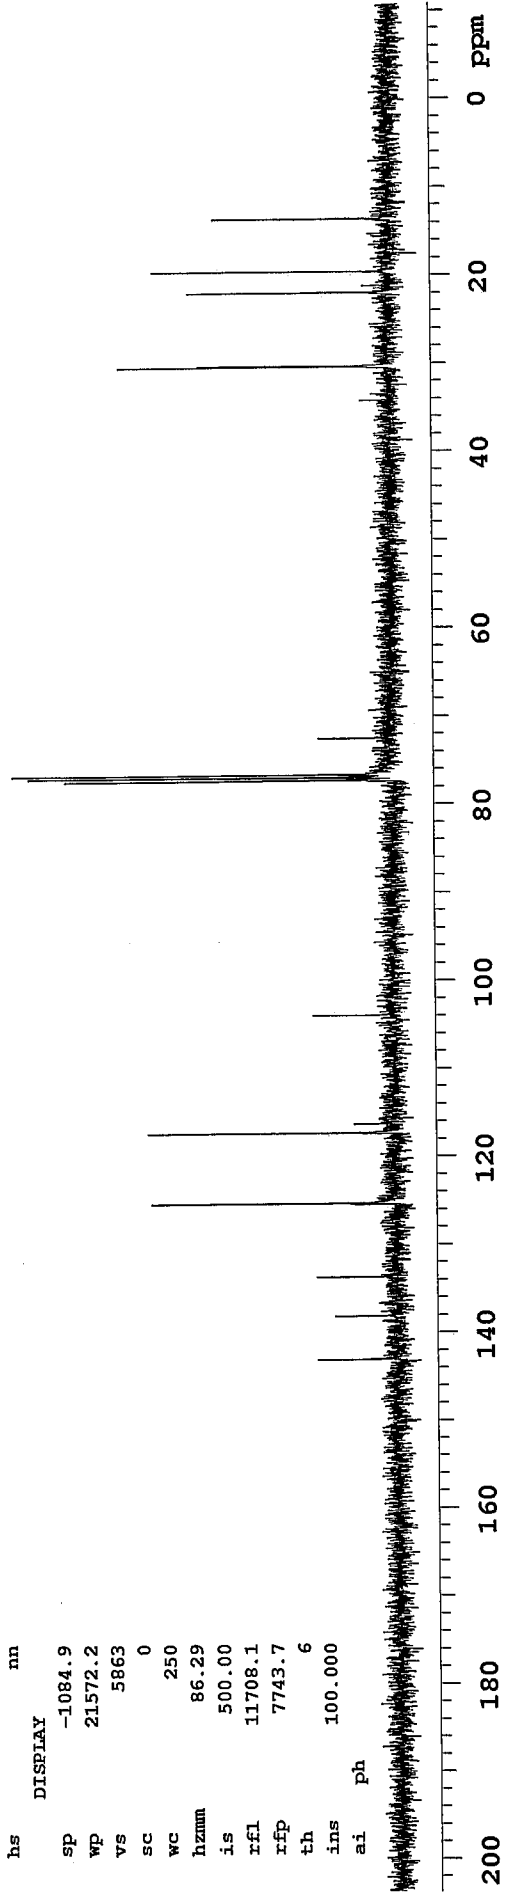



lyd-1-287-2-C-acetone

Sample: 1 Indanone  
File: nmr60b/Zhang/yluo/lyd-1-287-2-C-acetone.fid

Pulse Sequence: s2pul

Solvent: acetone  
Temp. 25.0 C / 298.1 K  
Operator: yluo  
File: lyd-1-287-2-C-acetone  
INOVA-500 "nmrserver"

Relax. delay 1.000 sec  
Pulse 10.0 usec  
Acq. time 1.298 sec  
Width 36231.9 Hz  
116 repetitions  
OBSERVE C13, 150.7783996 MHz  
DECOUPLE H1, 599.6382325 MHz  
Power 34 dB  
continuously on  
WALTZ-16 modulated  
DATA PROCESSING  
Line broadening 0.5 Hz  
FT size 131072  
Total time 7 hr, 41 min, 54 sec

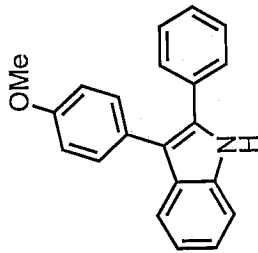

2a

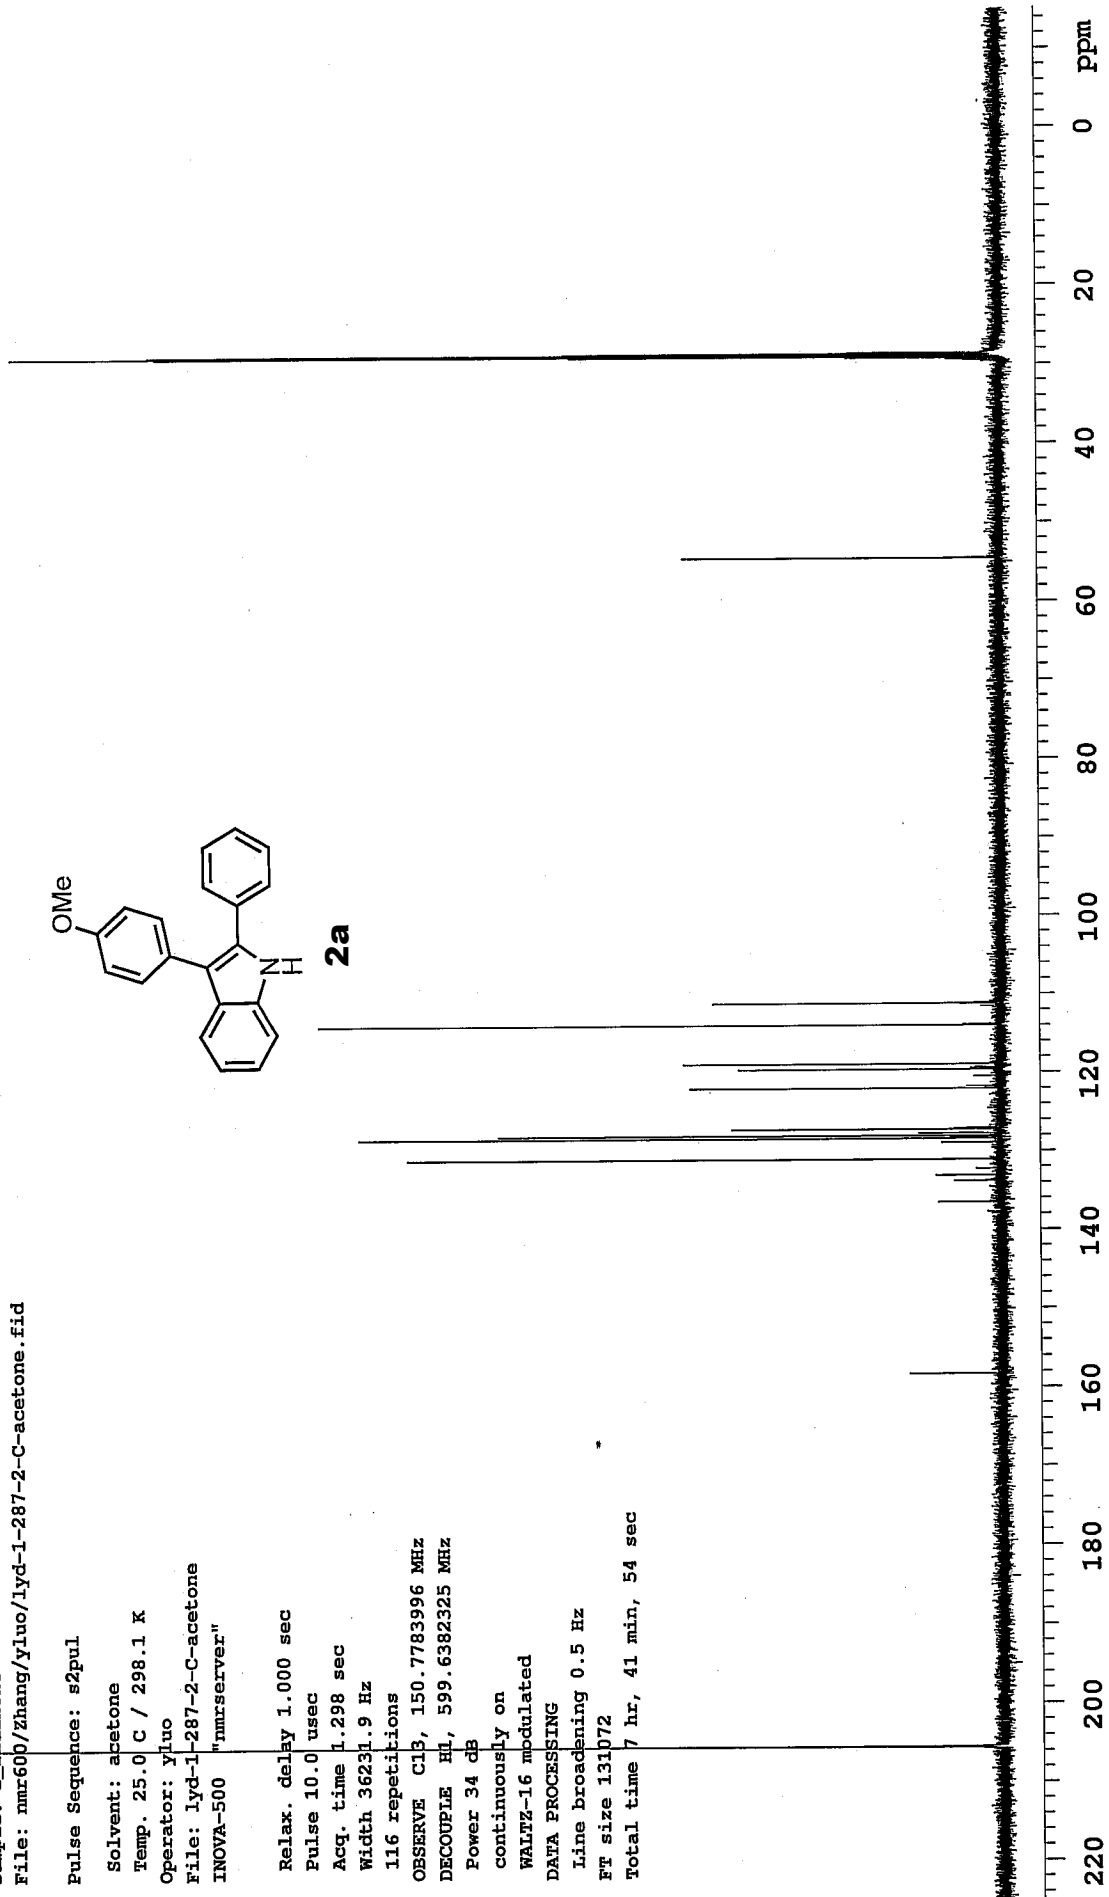

C:\Users\zhanglab1\Desktop\NMR\Nitus 20080731\DATA\lyd-1-284-1.fid

lyd-1-284-1

Apr 25 2011

USER:

SOLVENT: CDCl3

Experiment = s2pul

Pulse length = 7.700 usec

Relaxation delay = 4.800 sec

NA = 12

Solvent = CDCl3

FID PTS1d = 21259

PTS1d = 32768

F1 = 499.858551 MHz

F2 = 125.700813 MHz

SW1 = 8503.40 Hz

AT1 = 2.50 sec

Hz per Pt 1stD = 0.26 Hz

SW2 = 1.00 Hz

Hz per Pt 2ndD = 1.00 Hz

O1 = 2495.9019 Hz

O2 = -0.5000 Hz

LB1 = 0.00 Hz

TP A = 32.84

B = 1.46

C = 0.00

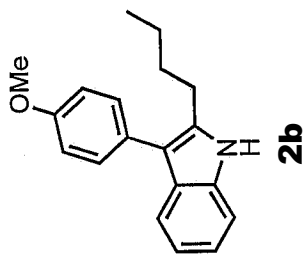

**2b**

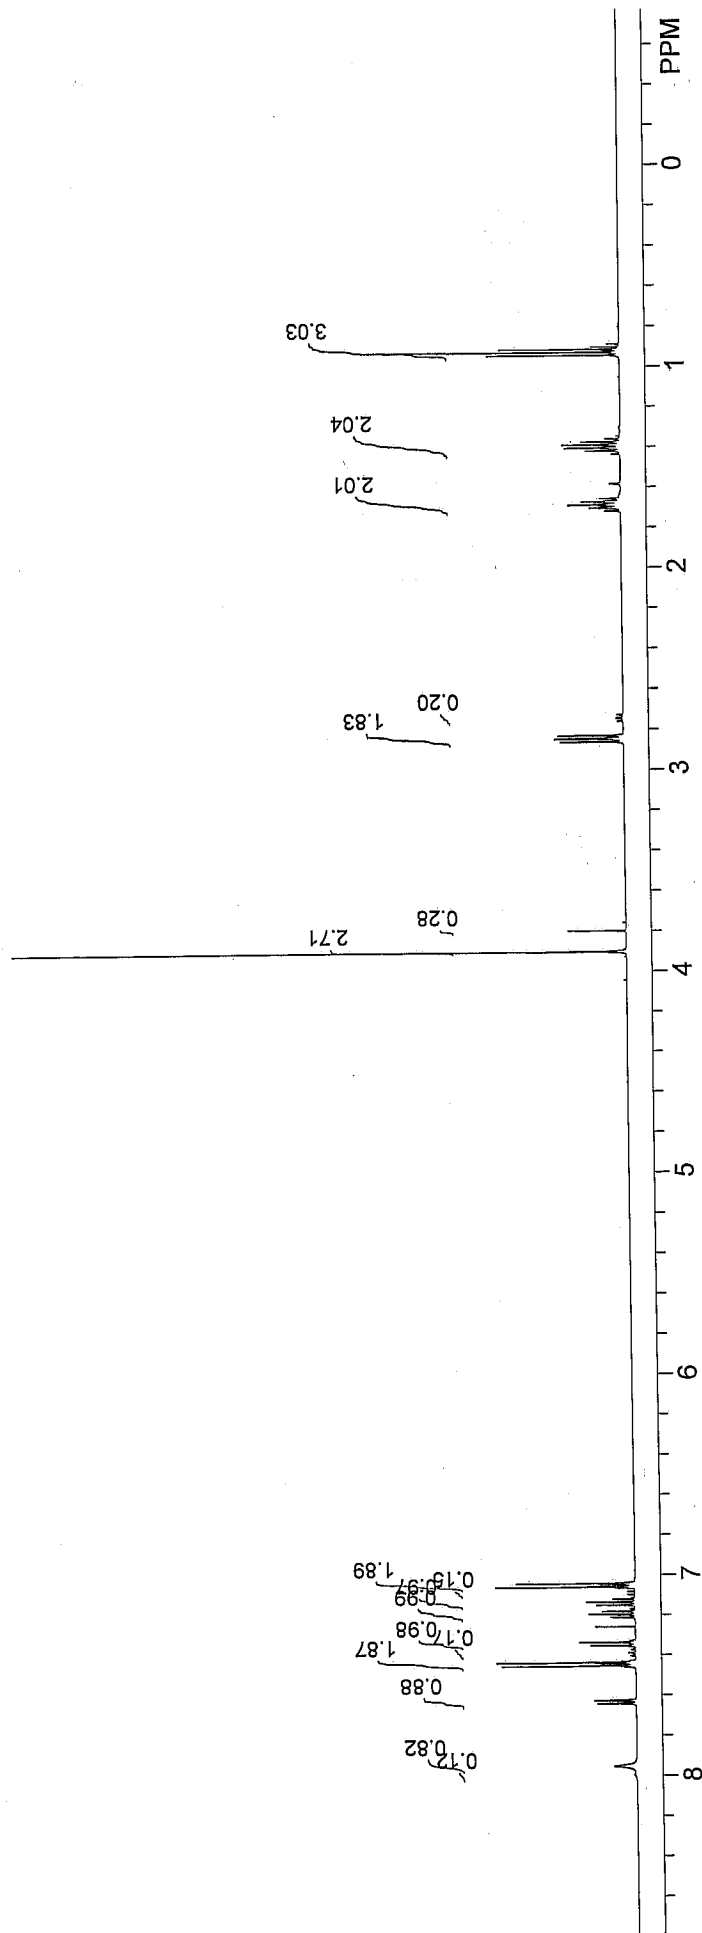



C:\Users\zhanglab1\Desktop\NMR\Nitus 20080731\DATA\lyd-1-284-1.fid

lyd-1-284-1

Apr 25 2011

USER:

SOLVENT: CDCl3

Experiment = s2pul

Pulse length = 7.700 usec

Relaxation delay = 4.800 sec

NA = 12

Solvent = CDCl3

FID PTS1d = 21259

PTS1d = 32768

F1 = 499.888551 MHz

F2 = 125.700813 MHz

SW1 = 8503.40 Hz

AT1 = 2.50 sec

Hz per Pt 1stD = 0.26 Hz

SW2 = 1.00 Hz

Hz per Pt 2ndD = 1.00 Hz

O1 = 2495.9019 Hz

O2 = -0.5000 Hz

LB1 = 0.00 Hz

TP A = 32.84

B = 1.46

C = 0.00

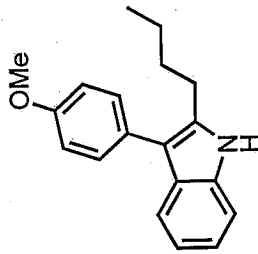

**2b**

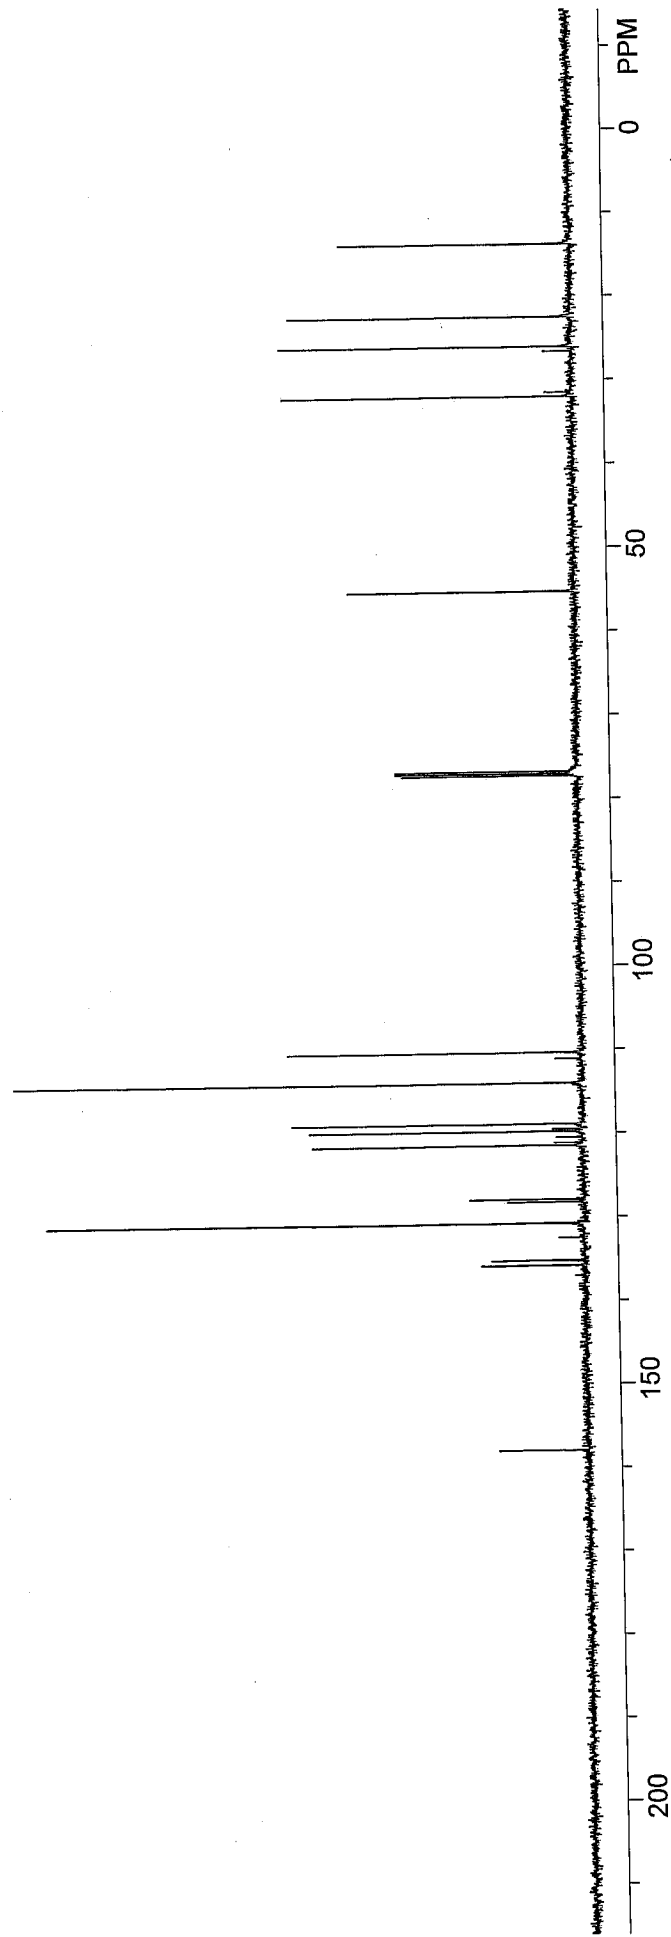



lyd-1-286-2-C

Sample: 1\_Indanone

File: nmr600/Zhang/yluo/lyd-1-286-2-C.fid

Pulse Sequence: s2pul

Solvent: cdcl3

Temp. 25.0 C / 298.1 K

Operator: yluc

File: lyd-1-286-2-C

INOVA-500 "nmrserver"

Relax. delay 1.000 sec

Pulse 10.0 usec

Acq. time 1.298 sec

Width 36231.9 Hz

68 repetitions

OBSERVE C13, 150.7776170 MHz

DECOUPLE H1, 599.6351203 MHz

Power 34 dB

continuously on

WALTZ-16 modulated

DATA PROCESSING

Line broadening 0.5 Hz

FT size 131072

Total time 7 hr, 41 min, 54 sec

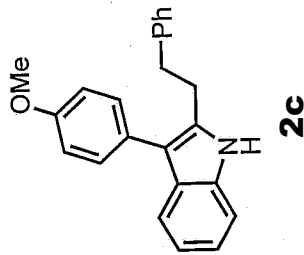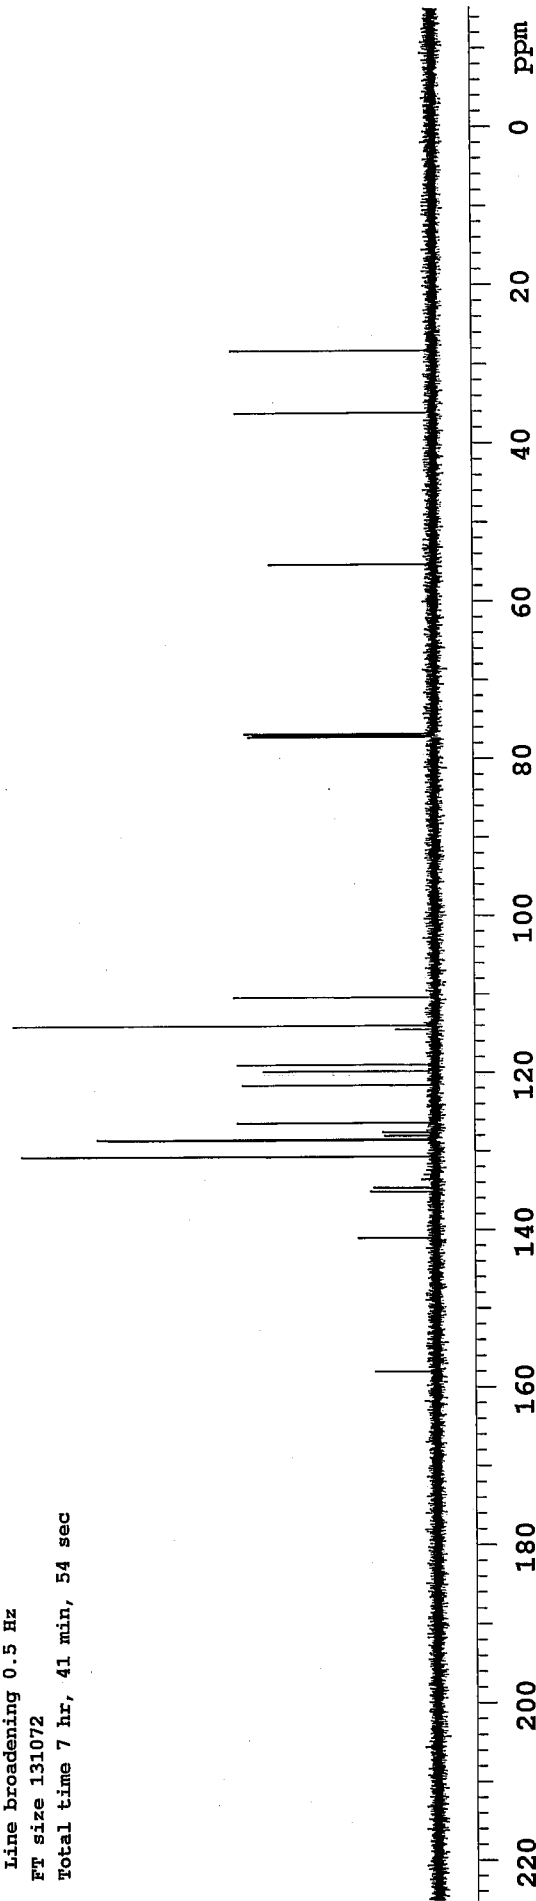

C:\Users\zhanglab1\Desktop\NMR\Ntus 20080731\DATA\lyd-1-287-1-3rd.fid

lyd-1-287-1-3rd

Apr 26 2011

USER:

SOLVENT: cdcl3

Experiment = s2pul

Pulse length = 5.825 usec

Relaxation delay = 4.800 sec

NA = 16

Solvent = cdcl3

FID PTS1d = 25000

PTS1d = 32768

F1 = 599.634705 MHz

F2 = 599.635132 MHz

SW1 = 10000.00 Hz

AT1 = 2.50 sec

Hz per Pt 1stD = 0.31 Hz

SW2 = 1.00 Hz

Hz per Pt 2ndD = 1.00 Hz

O1 = 2605.0764 Hz

O2 = -0.5000 Hz

LB1 = 0.00 Hz

TP A = -134.59

B = 2.81

C = 0.00

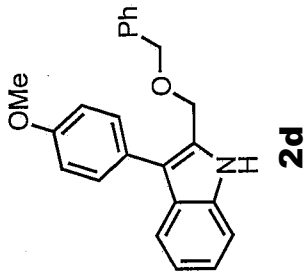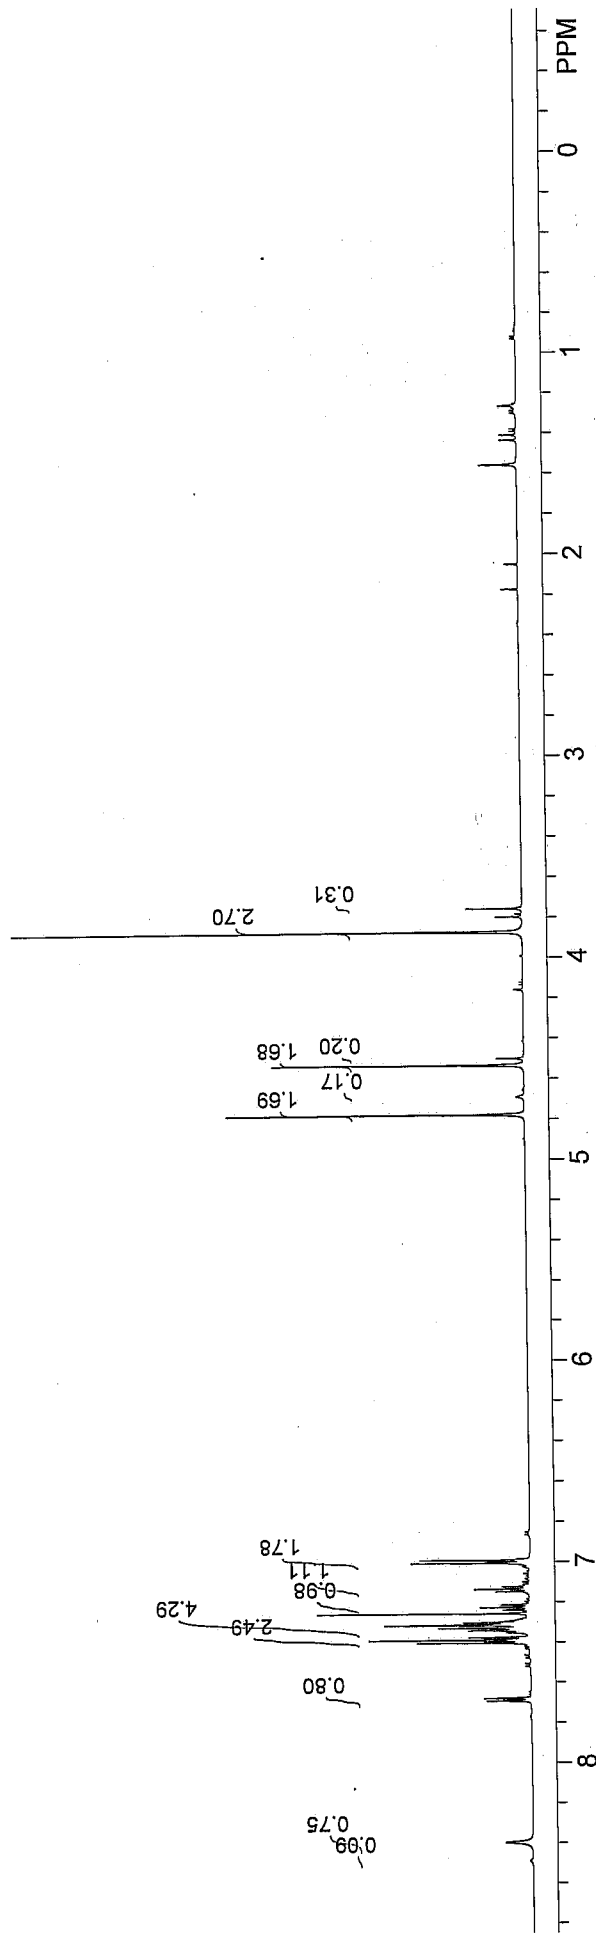

lyd-1-287-1-3rd-C

Sample: 1\_Indanone

File: nmr600/Zhang/yluo/lyd-1-287-1-3rd-C.fid

Pulse Sequence: s2pul

Solvent: cdcl3

Temp. 25.0 C / 298.1 K

Operator: yluo

File: lyd-1-287-1-3rd-C

INOVA-500 "nmrserver"

Relax. delay 1.000 sec

Pulse 10.0 usec

Acq. time 1.298 sec

Width 36231.9 Hz

120 repetitions

OBSERVE C13, 150.7776170 MHz

DECOUPLE H1, 599.6351203 MHz

Power 34 dB

continuously on

WALTZ-16 modulated

DATA PROCESSING

Line broadening 0.5 Hz

FT size 131072

Total time 7 hr, 41 min, 54 sec

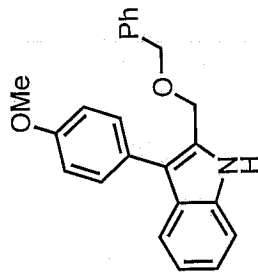

2d

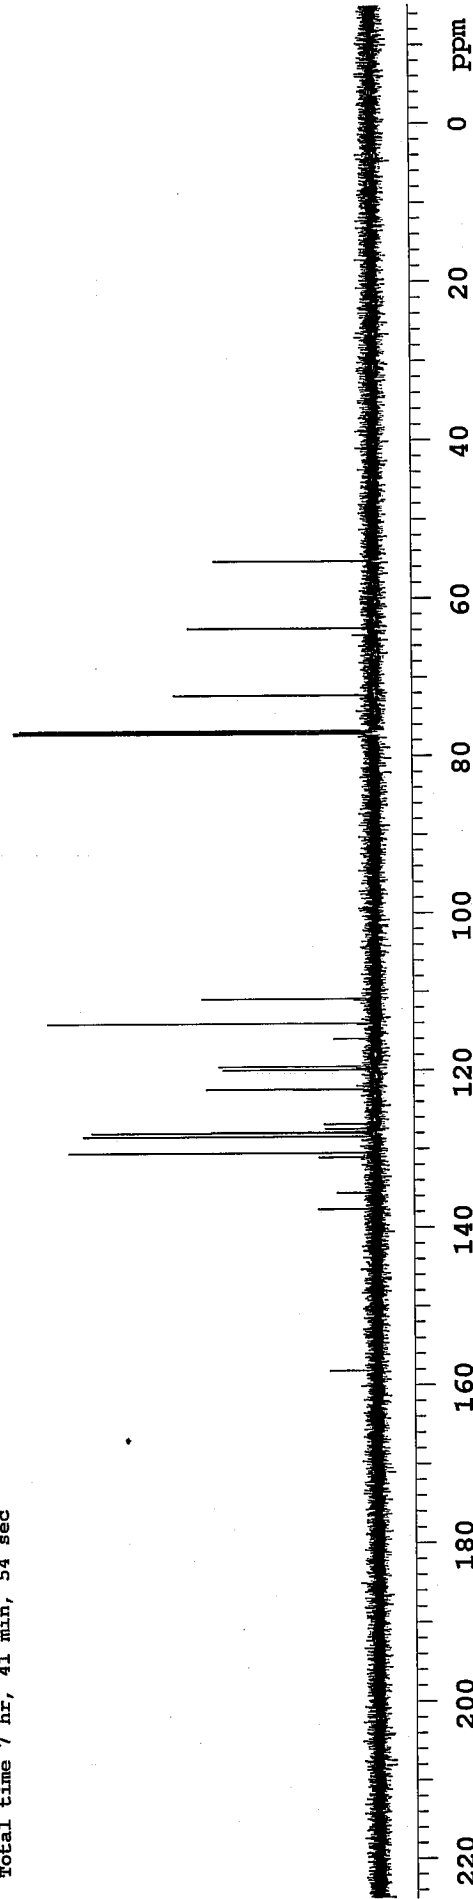

lyd-1-284-2

Apr 25 2011

USER:

SOLVENT: cdcl3

Experiment = s2pul

Pulse length = 5.825 usec

Relaxation delay = 4.800 sec

NA = 16

Solvent = cdcl3

FID PTS1d = 25000

PTS1d = 32768

F1 = 599.634705 MHz

F2 = 599.635132 MHz

SW1 = 10000.00 Hz

AT1 = 2.50 sec

Hz per Pt 1stD = 0.31 Hz

SW2 = 1.00 Hz

Hz per Pt 2ndD = 1.00 Hz

O1 = 2605.6877 Hz

O2 = -0.5000 Hz

LB1 = 0.00 Hz

TP A = -133.24

B = 3.60

C = 0.00

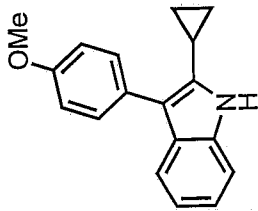

2e

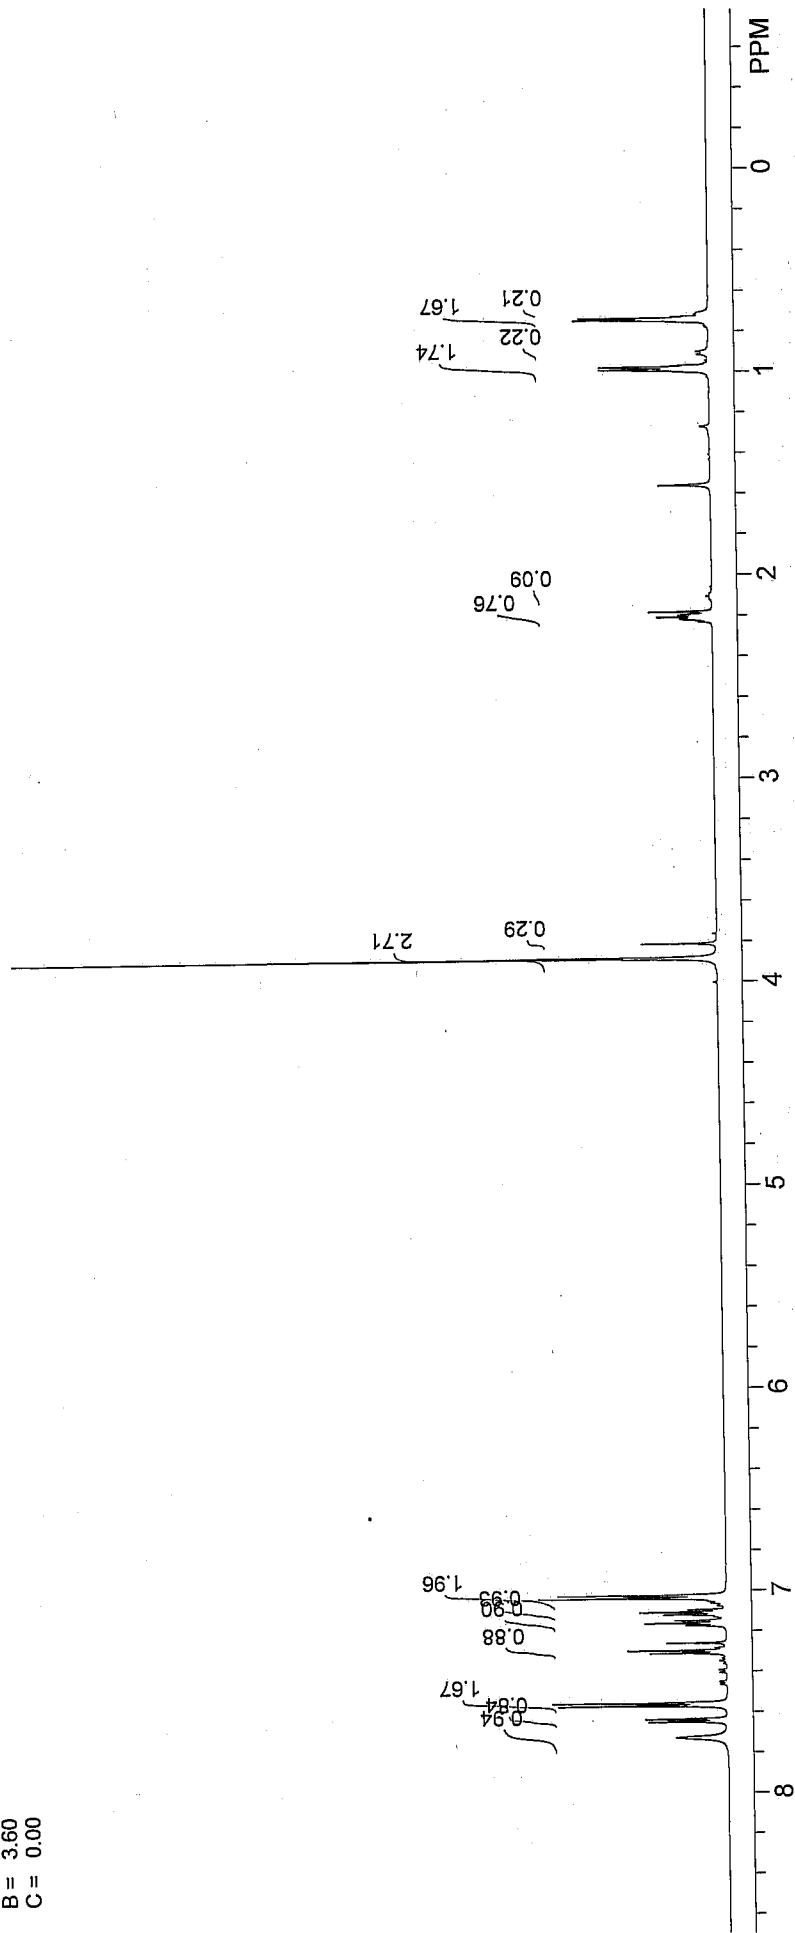

lyd-1-284-2-C

Sample: 1\_Indanone

File: nmr600/Zhang/yluo/lyd-1-284-2-C.fid

Pulse Sequence: s2pul

Solvent: cdcl3

Temp. 25.0 C / 298.1 K

Operator: Yluo

File: lyd-1-284-2-C

INOVA-500 "nmrserver"

Relax. delay 1.000 sec

Pulse 10.0 usec

Acq. time 1.298 sec

Width 36231.9 Hz

136 repetitions

OBSERVE C13, 150.7776170 MHz

DECOUPLE H1, 599.6351203 MHz

Power 34 dB

continuously on

WALTZ-16 modulated

DATA PROCESSING

Line broadening 0.5 Hz

FT size 131072

Total time 7 hr, 41 min, 54 sec

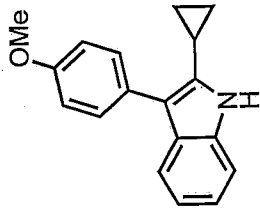

**2e**

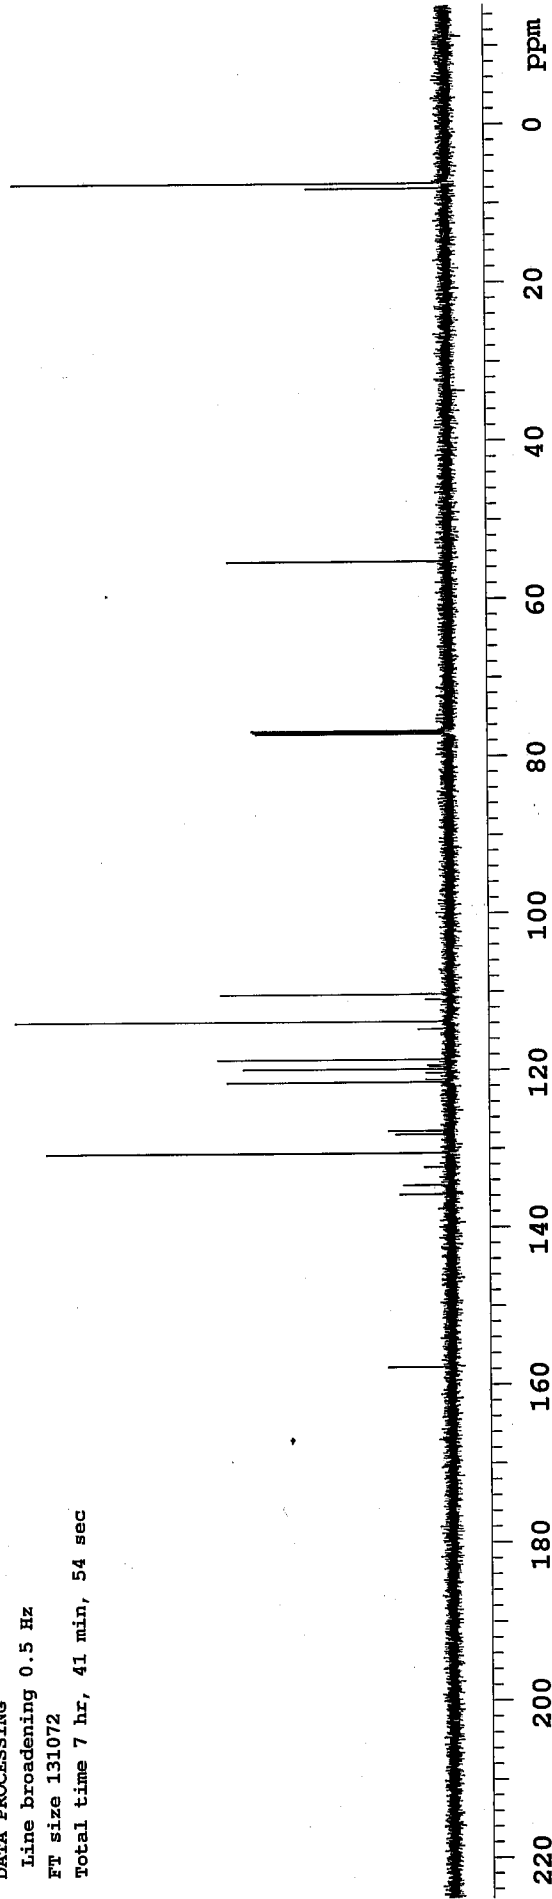

C:\Users\zhanglab1\Desktop\NMR\Ntus 20080731\DATA\lyd-1-285-2-C.fid

lyd-1-285-2-C

Apr 25 2011

USER:

SOLVENT: CDCl3

Experiment = s2pul

Pulse length = 7.000 usec

Relaxation delay = 1.000 sec

NA = 132

Solvent = CDCl3

FID PTS1d = 39295

PTS1d = 65536

F1 = 125.702103 MHz

F2 = 499.858551 MHz

SW1 = 30165.91 Hz

AT1 = 1.30 sec

Hz per Pt 1stD = 0.46 Hz

SW2 = 1.00 Hz

Hz per Pt 2ndD = 1.00 Hz

O1 = 13197.3711 Hz

O2 = -0.5000 Hz

LB1 = 2.00 Hz

TP A = 71.25

B = 106.88

C = 0.00

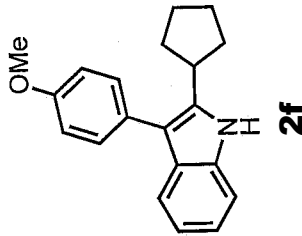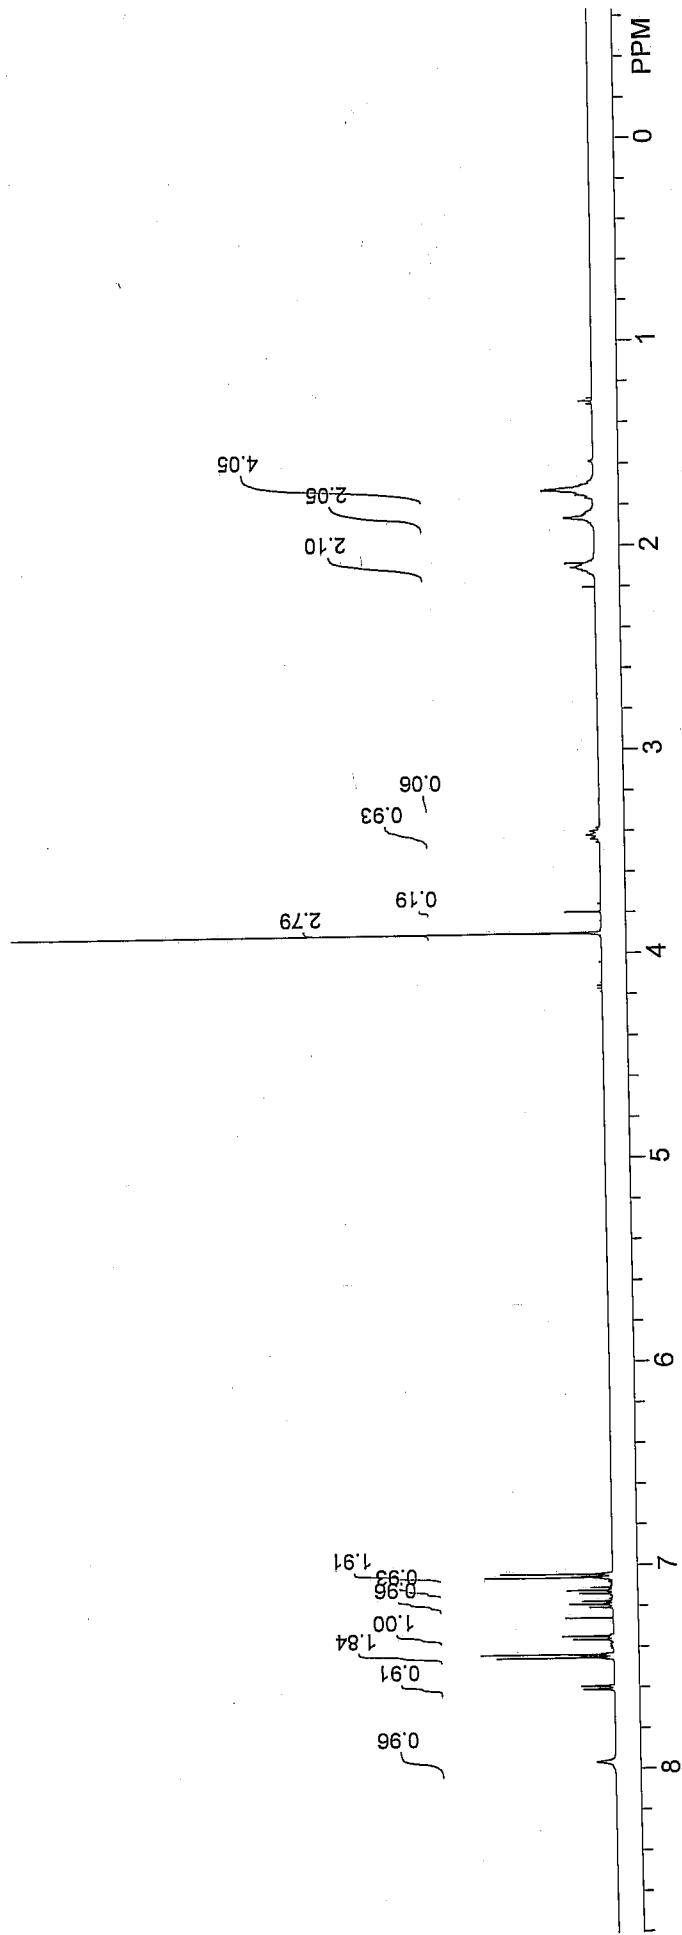



C:\Users\zhanglab1\Desktop\NMR\Ntus 20080731\DATA\fyd-1-285-2-C.fid

fyd-1-285-2-C

Apr 25 2011

USER:

SOLVENT: CDCl3

Experiment = s2pul

Pulse length = 7.000 usec

Relaxation delay = 1.000 sec

NA = 132

Solvent = CDCl3

FID PTS1d = 39295

PTS1d = 65536

F1 = 125.702103 MHz

F2 = 499.858551 MHz

SW1 = 30165.91 Hz

AT1 = 1.30 sec

Hz per Pt 1stD = 0.46 Hz

SW2 = 1.00 Hz

Hz per Pt 2ndD = 1.00 Hz

O1 = 13197.3711 Hz

O2 = -0.5000 Hz

LB1 = 2.00 Hz

TP A = 71.25

B = 106.88

C = 0.00

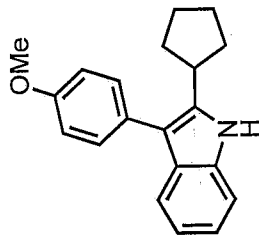

**2f**

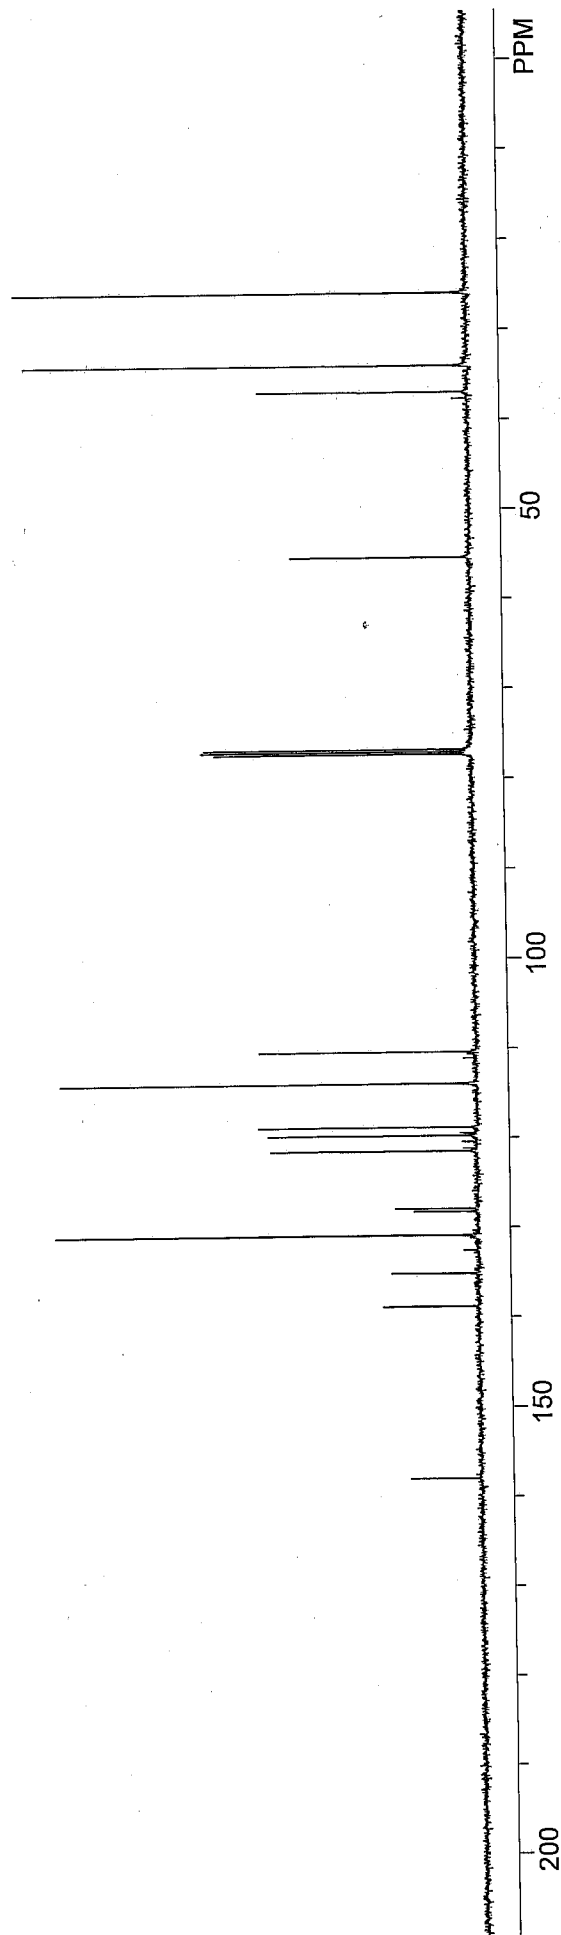

C:\Users\zhanglab1\Desktop\NMR\Nius 20080731\DATA\lyd-1-285-1-2nd.fid

lyd-1-285-1-2nd

Apr 26 2011

USER:

SOLVENT: cdcl3

Experiment = s2pul

Pulse length = 5.825 usec

Relaxation delay = 4.800 sec

NA = 8

Solvent = cdcl3

FID PTS1d = 25000

PTS1d = 32768

F1 = 599.634705 MHz

F2 = 599.635132 MHz

SW1 = 10000.00 Hz

AT1 = 2.50 sec

Hz per Pt 1stD = 0.31 Hz

SW2 = 1.00 Hz

Hz per Pt 2ndD = 1.00 Hz

O1 = 2605.9919 Hz

O2 = -0.5000 Hz

LB1 = 0.00 Hz

TP A = -138.11

B = 3.60

C = 0.00

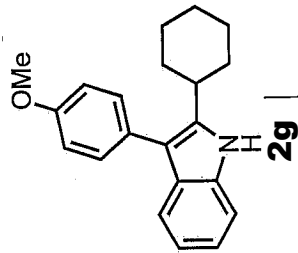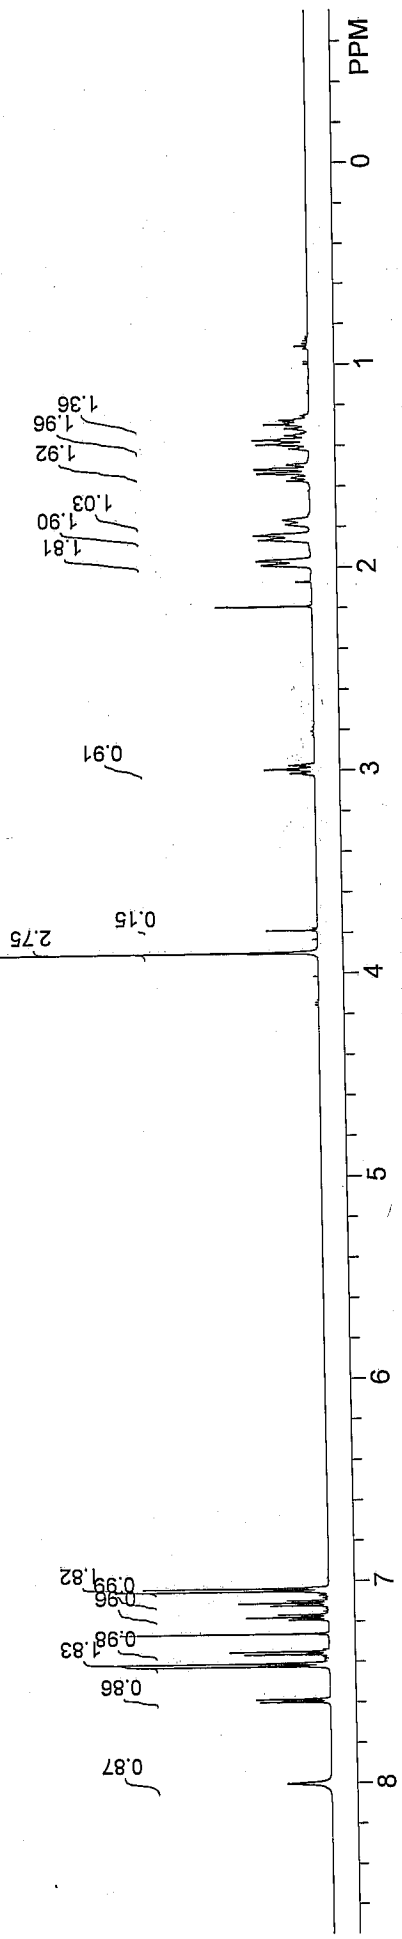

lyd-1-285-1-2nd-C

Sample: 1\_Indanone  
File: nmr600/Zhang/yluo/lyd-1-285-1-2nd-C.fid

Pulse Sequence: s2pul

Solvent: cdcl3  
Temp. 25.0 C / 298.1 K  
Operator: Yluo  
File: lyd-1-285-1-2nd-C  
INNOVA-500 "nmrserver"

Relax. delay 1.000 sec  
Pulse 10.0 usec  
Acq. time 1.298 sec  
Width 36231.9 Hz  
44 repetitions  
OBSERVE C13, 150.7776170 MHz  
DECOUPLE H1, 599.6351203 MHz  
Power 34 dB  
continuously on  
WALTZ-16 modulated  
DATA PROCESSING  
Line broadening 0.5 Hz  
FT size 131072  
Total time 7 hr, 41 min, 54 sec

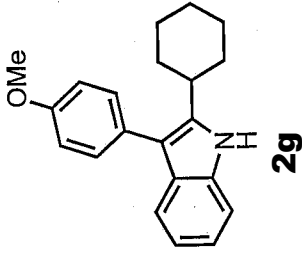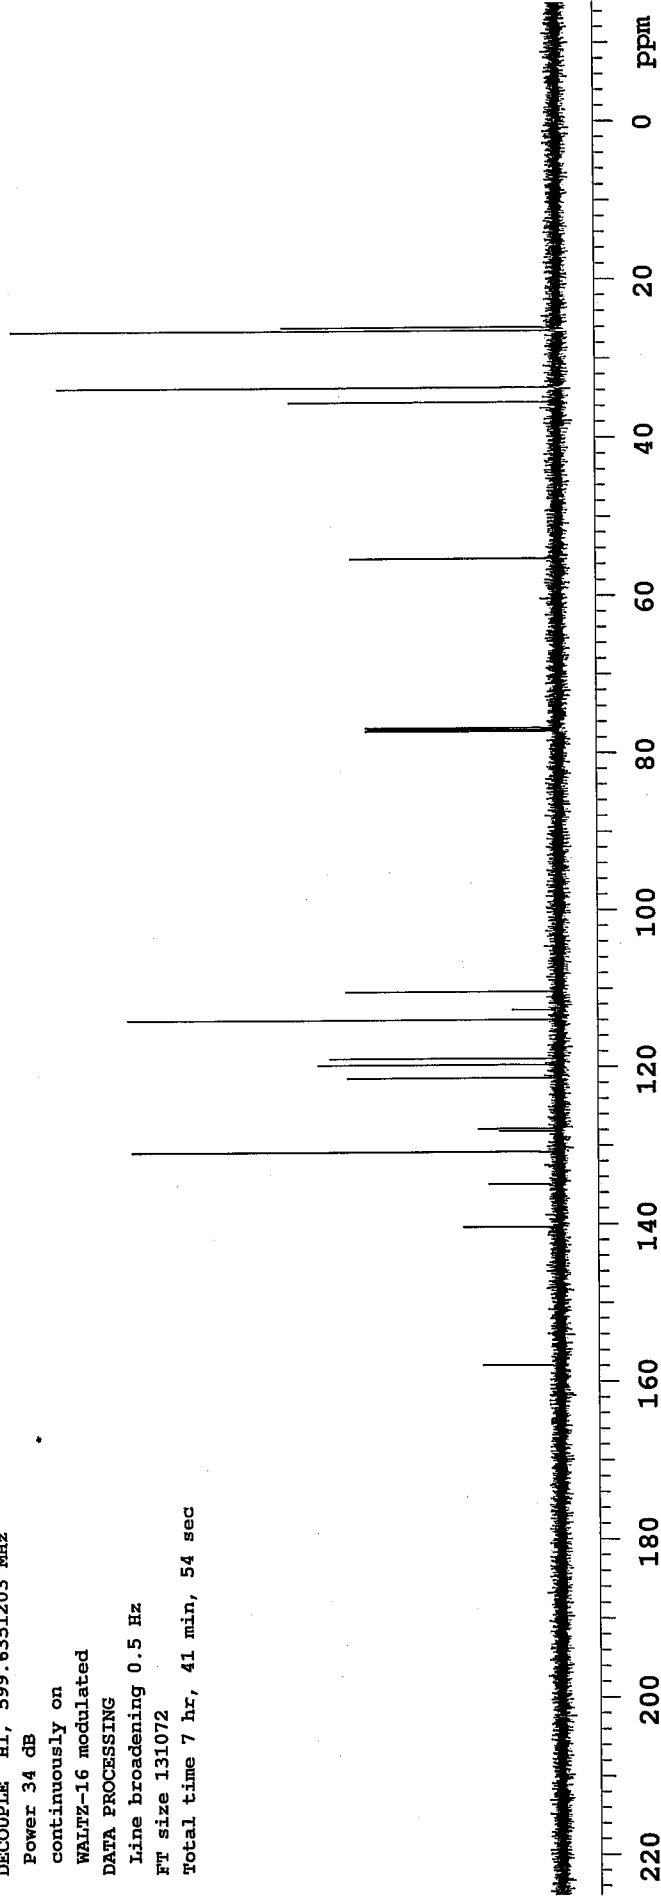

C:\Users\zhanglab1\Desktop\NMR\Nius 20080731\DATA\lyd-1-284-1.fid

lyd-1-284-1

Apr 25 2011

USER:

SOLVENT: CDCl3

Experiment = s2pul

Pulse length = 7.700 usec

Relaxation delay = 4.800 sec

NA = 12

Solvent = CDCl3

FID PTS1d = 21259

PTS1d = 32768

F1 = 499.858551 MHz

F2 = 125.700813 MHz

SW1 = 8503.40 Hz

AT1 = 2.50 sec

Hz per Pt 1stD = 0.26 Hz

SW2 = 1.00 Hz

Hz per Pt 2ndD = 1.00 Hz

O1 = 2495.9019 Hz

O2 = -0.5000 Hz

LB1 = 0.00 Hz

TP A = 32.84

B = 1.46

C = 0.00

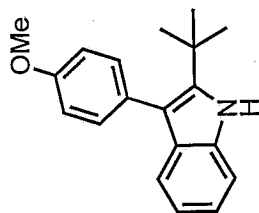

2h

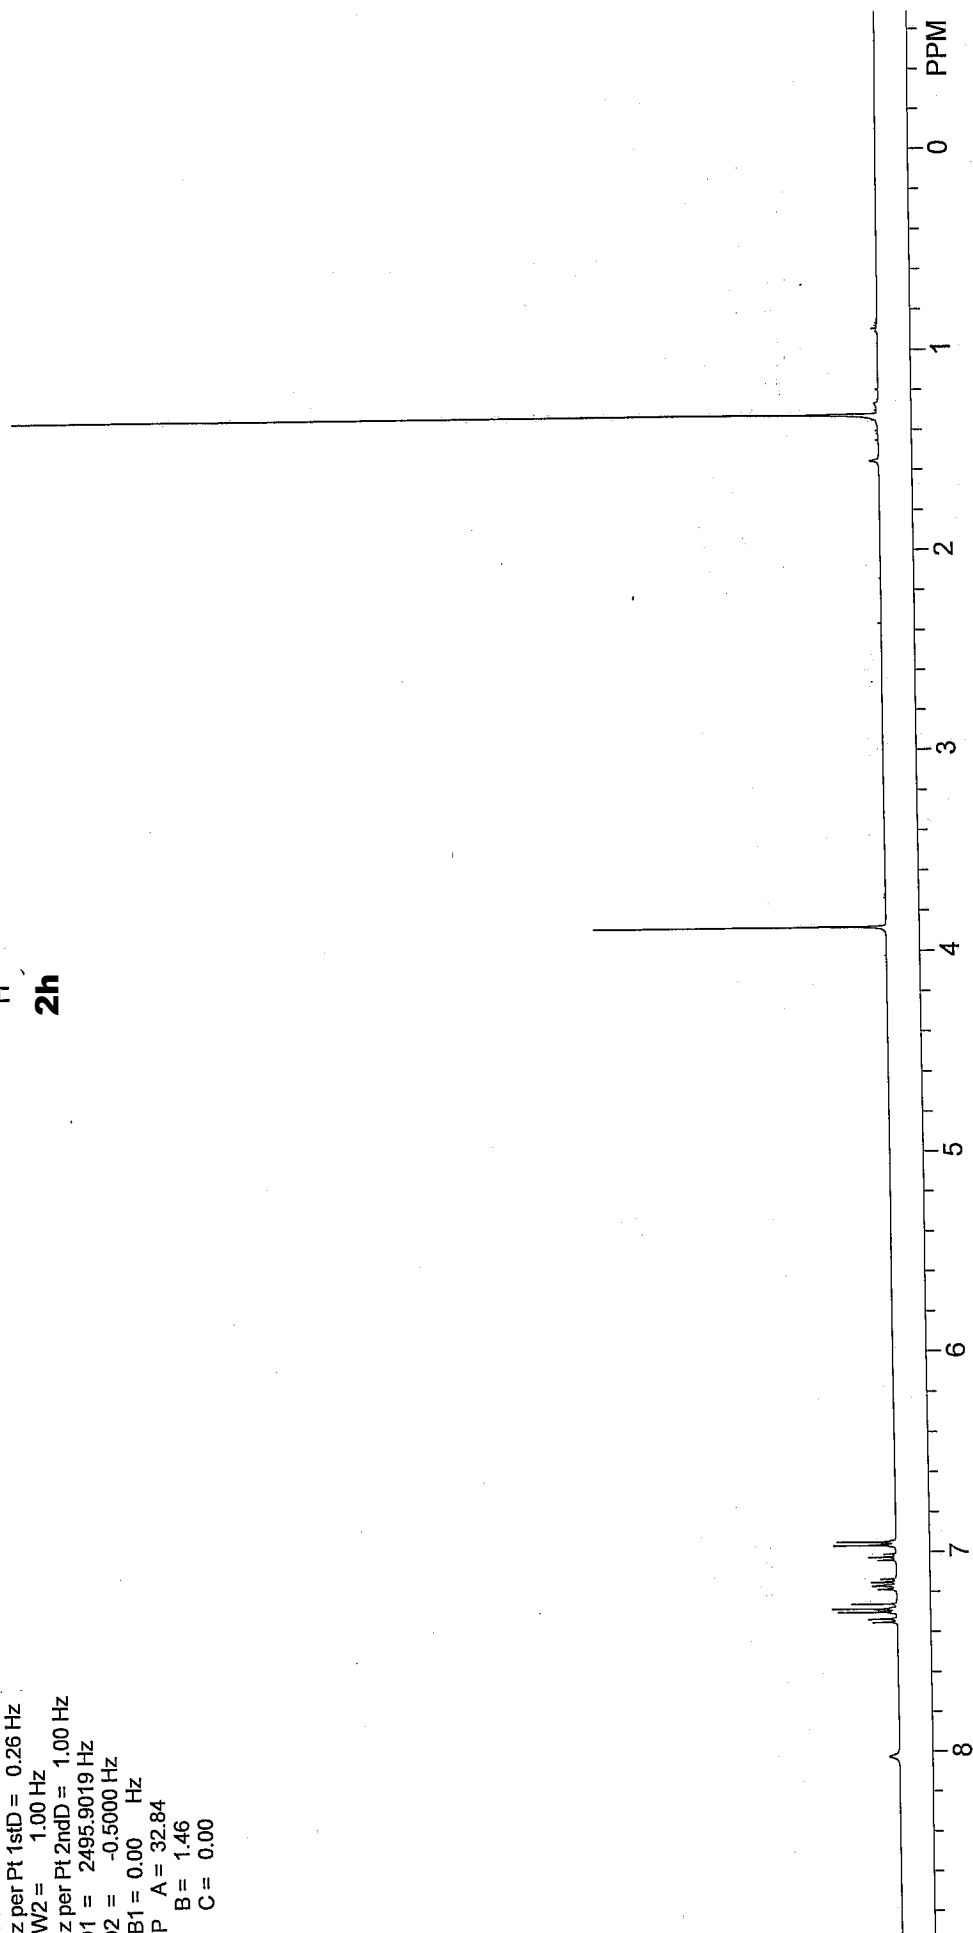

C:\Users\zhanglab1\Desktop\NMR\Ntius 20080731\DATA\tyd-1-284-1.fid

tyd-1-284-1

Apr 25 2011

USER:

SOLVENT: CDCI3

Experiment = s2pul

Pulse length = 7.700 usec

Relaxation delay = 4.800 sec

NA = 12

Solvent = CDCI3

FID PTS1d = 21259

PTS1d = 32768

F1 = 499.858551 MHz

F2 = 125.700813 MHz

SW1 = 8503.40 Hz

AT1 = 2.50 sec

Hz per Pt 1stID = 0.26 Hz

SW2 = 1.00 Hz

Hz per Pt 2ndID = 1.00 Hz

O1 = 2495.9019 Hz

O2 = -0.5000 Hz

LB1 = 0.00 Hz

TP A = 32.84

B = 1.46

C = 0.00

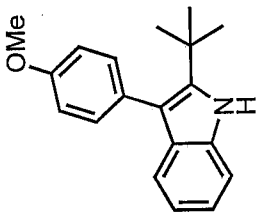

2h

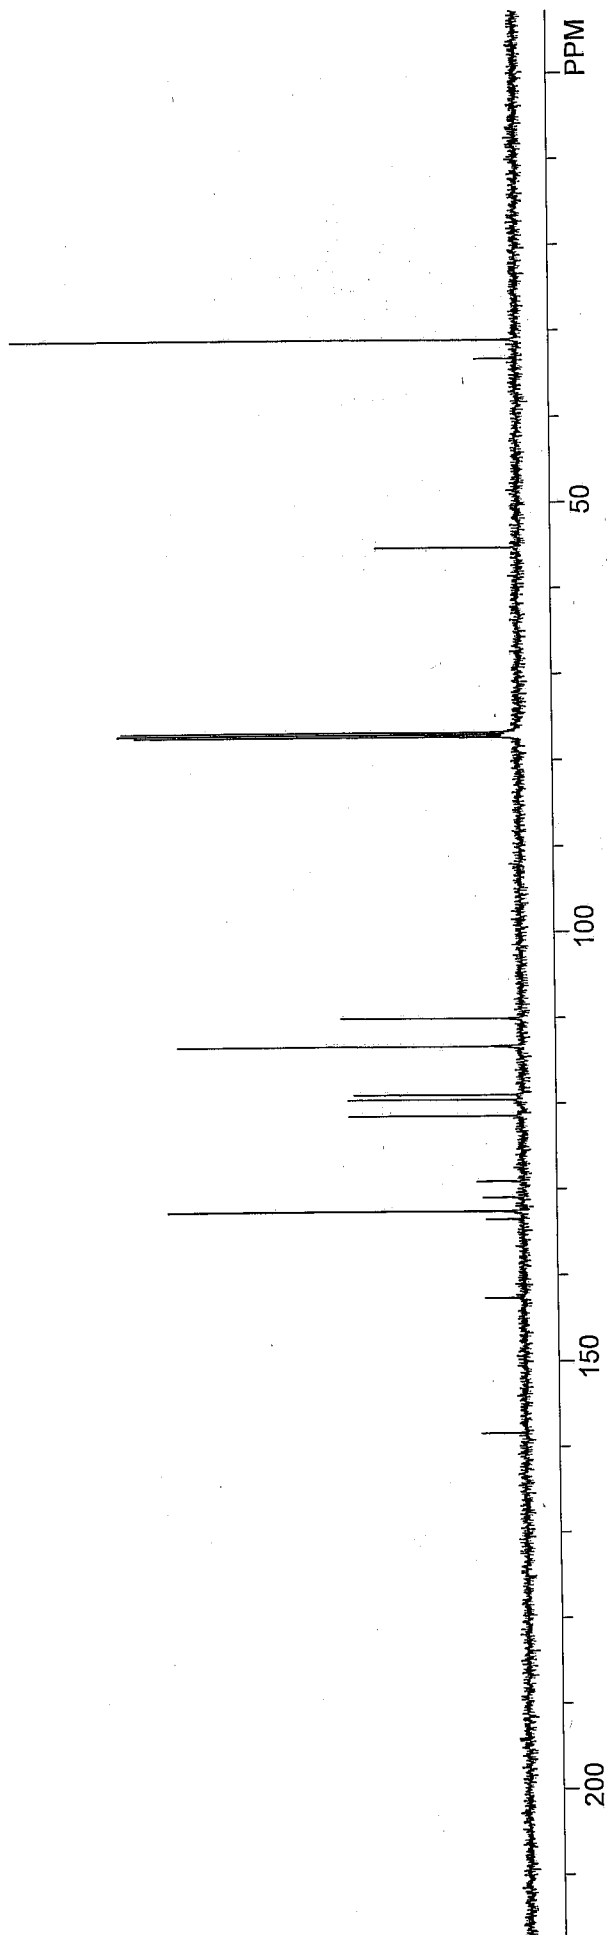

C:\Users\zhanglab1\Desktop\NMR\Ntus 20080731\DATA\1-291-2.fid

1-291-2

Apr 29 2011

USER:

SOLVENT: cdcl3

Experiment = s2pul

Pulse length = 5.825 usec

Relaxation delay = 4.800 sec

NA = 8

Solvent = cdcl3

FID PTS1d = 25000

PTS1d = 32768

F1 = 599.634705 MHz

F2 = 599.635132 MHz

SW1 = 10000.00 Hz

AT1 = 2.50 sec

Hz per Pt 1sID = 0.31 Hz

SW2 = 1.00 Hz

Hz per Pt 2ndD = 1.00 Hz

O1 = 2605.6868 Hz

O2 = -0.5000 Hz

LB1 = 0.00 Hz

TP A = -143.91

B = 2.81

C = 0.00

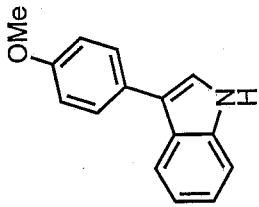

2i

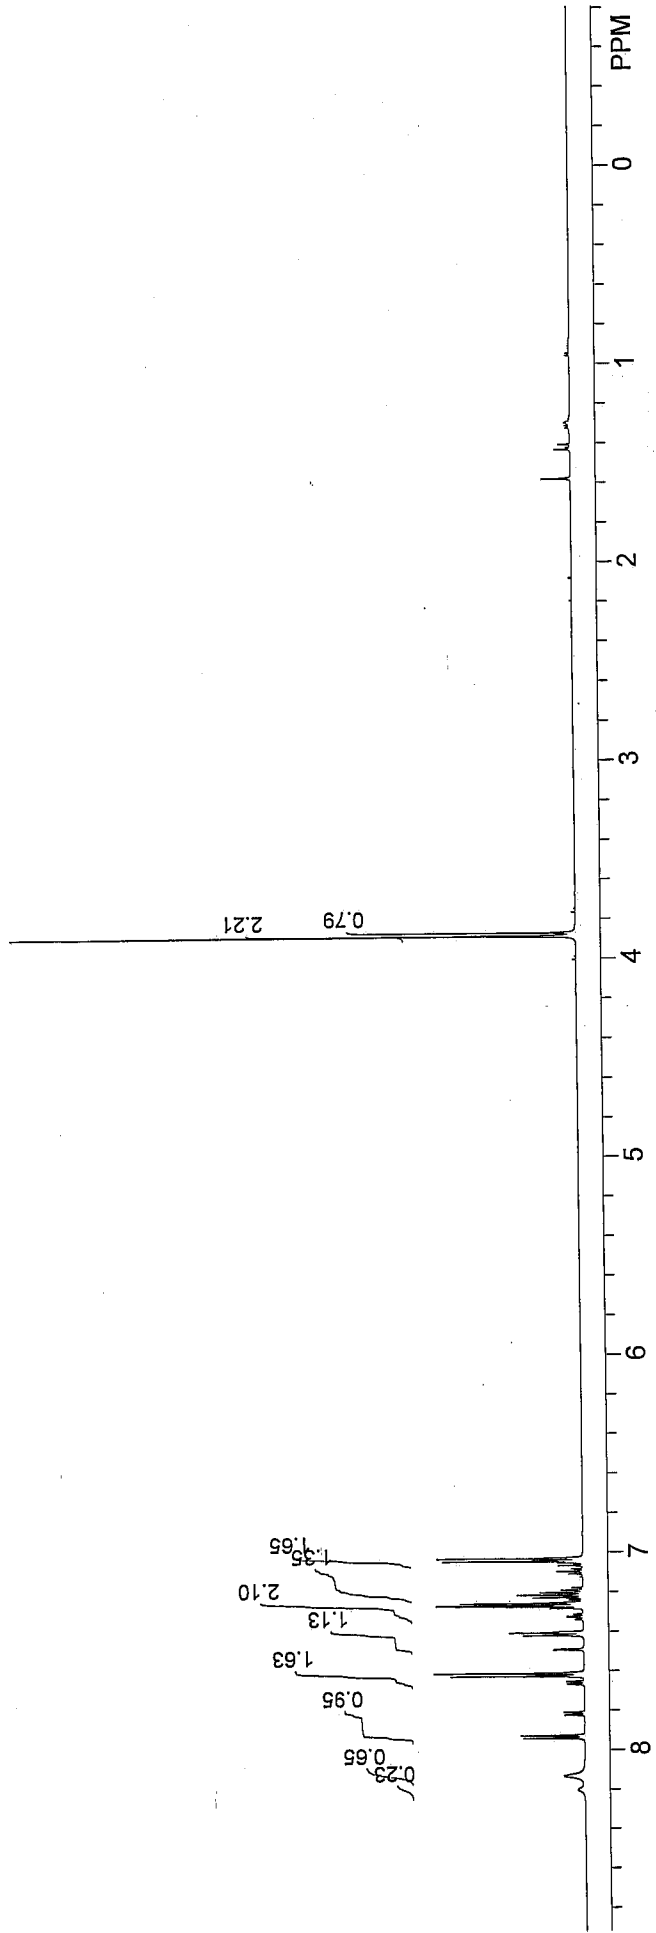

lyd-1-291-2-C

Sample: 1\_Indanone  
File: nmr600/Zhang/Yluo/lyd-1-291-2-C.fid

Pulse Sequence: s2pul

Solvent: cdcl3  
Temp. 25.0 C / 298.1 K  
Operator: Yluo  
File: lyd-1-291-2-C  
INOVA-500 "nmrserver"

Relax. delay 1.000 sec  
Pulse 10.0 usec  
Acq. time 1.298 sec  
Width 36231.9 Hz  
252 repetitions  
OBSERVE C13, 150.7776170 MHZ  
DECOUPLE H1, 599.6351203 MHZ  
Power 34 dB  
continuously on  
WALTZ-16 modulated  
DATA PROCESSING  
Line broadening 0.5 Hz  
FT size 131072  
Total time 7 hr, 41 min, 54 sec

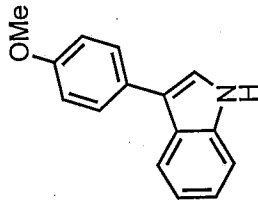

2i

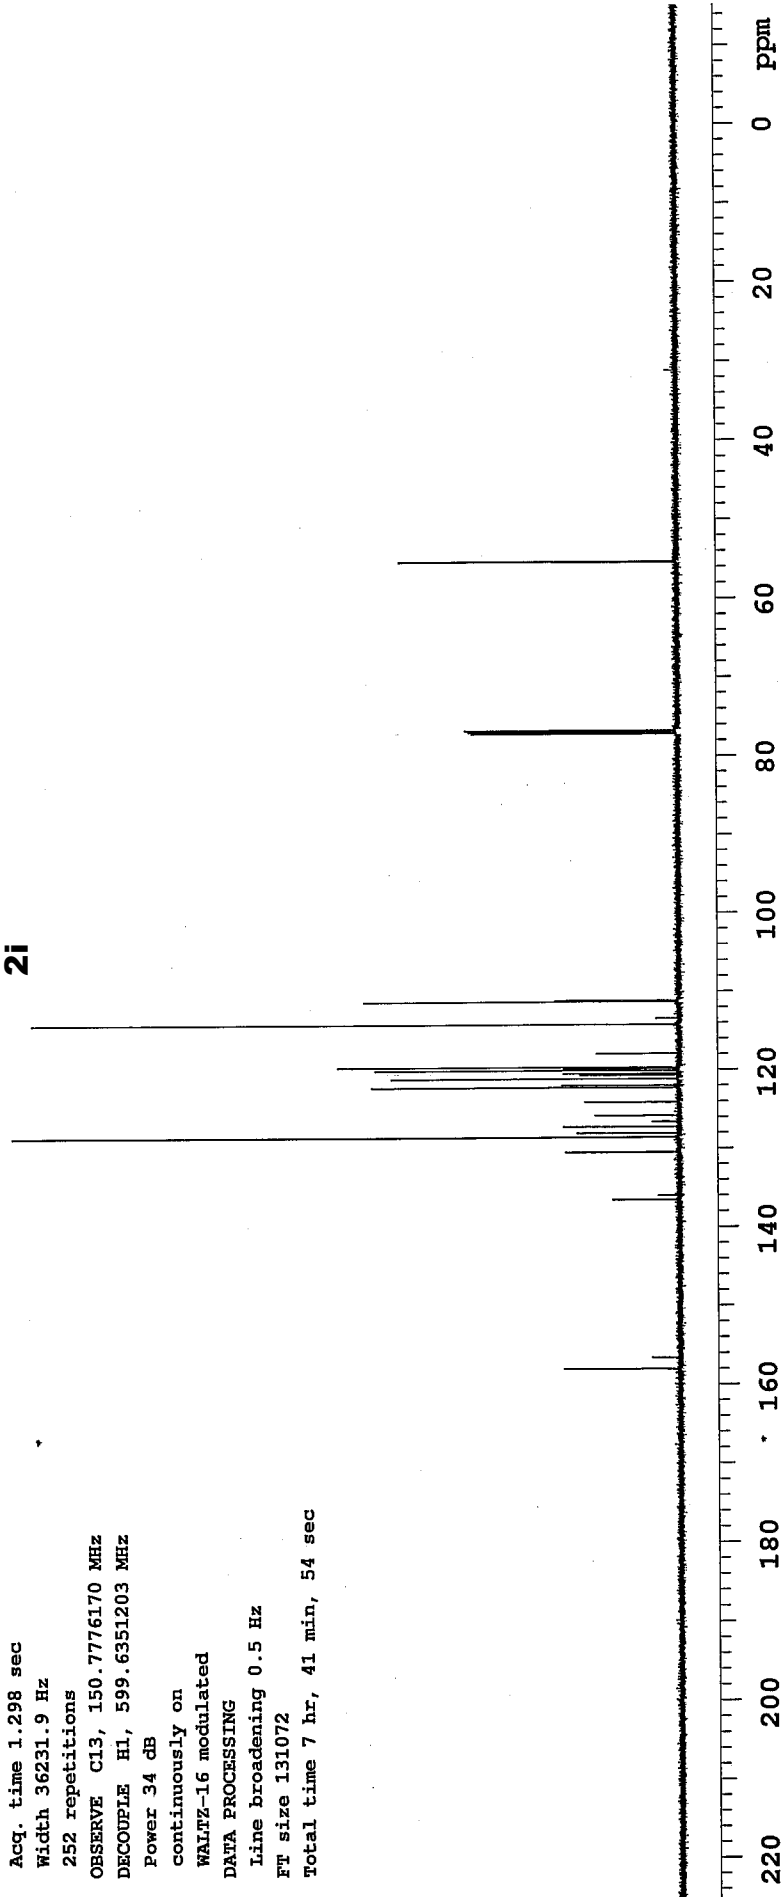





lyd-1-290-1-C

Sample: 1\_Indanone  
File: nmr600/zhang/yluo/lyd-1-290-1-C.fid

Pulse Sequence: s2pul

Solvent: cdcl3  
Temp. 25.0 C / 298.1 K  
Operator: yluo  
File: lyd-1-290-1-C  
INOVA-500 "nmrserver"

Relax. delay 1.000 sec  
Pulse 10.0 usec  
Acq. time 1.298 sec  
Width 36231.9 Hz  
1676 repetitions  
OBSERVE C13, 150.7776170 MHz  
DECOUPLE H1, 599.6351203 MHz  
Power 34 dB  
continuously on  
WALTZ-16 modulated  
DATA PROCESSING  
Line broadening 0.5 Hz  
FT size 131072  
Total time 7 hr, 41 min, 54 sec

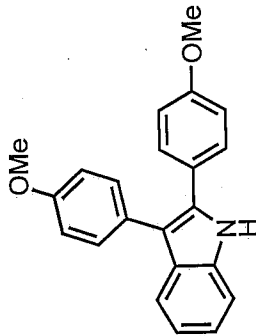

2j

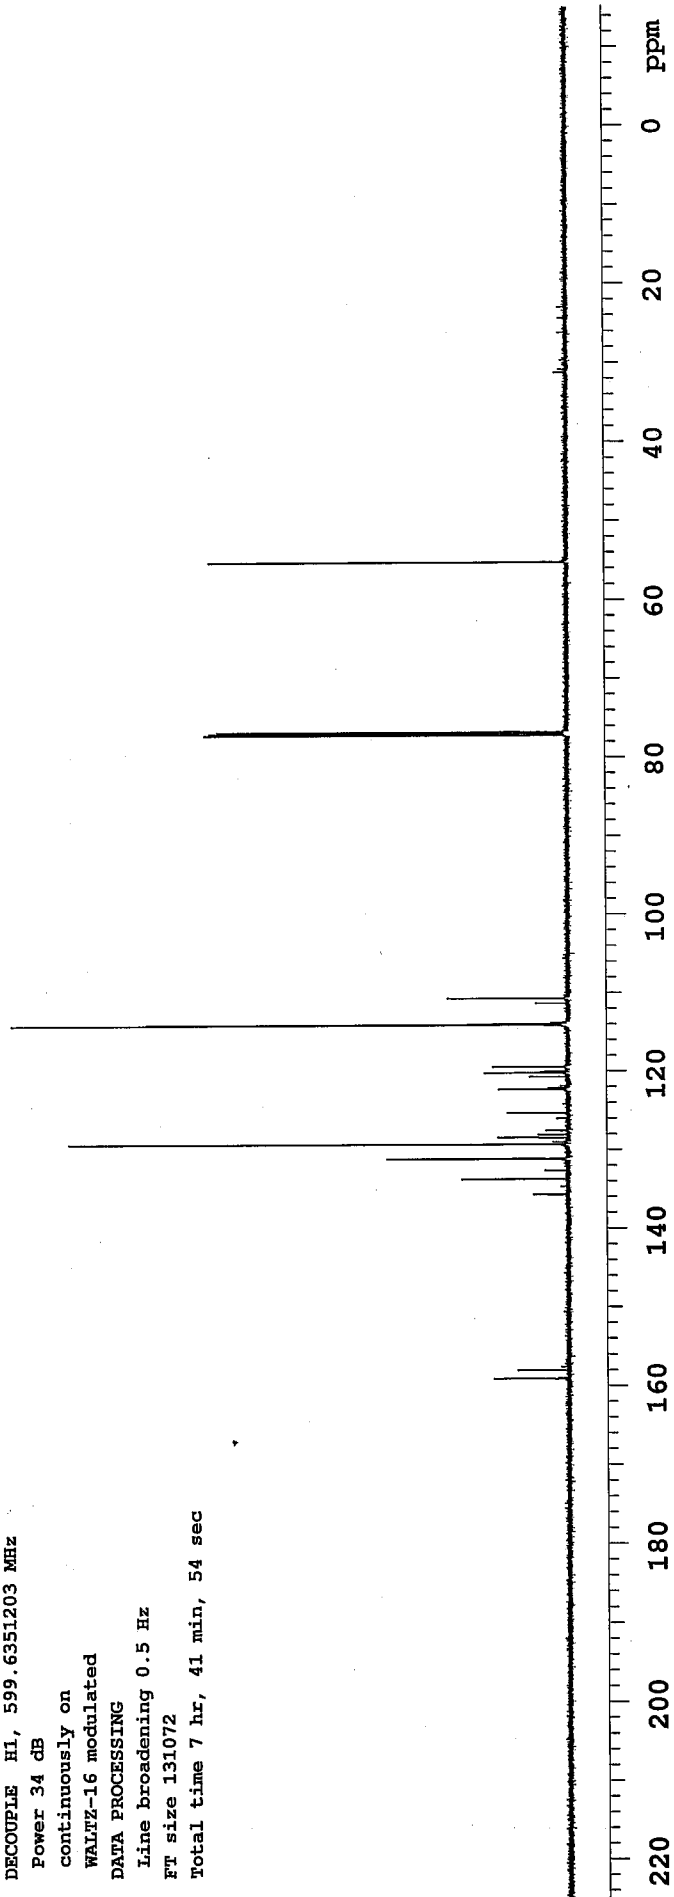

C:\Users\zhanglab1\Desktop\NMR\Ntus 20080731\DATA\1-290-2.fid

1-290-2

Apr 28 2011

USER:

SOLVENT: CDCl3

Experiment = s2pul

Pulse length = 7.700 usec

Relaxation delay = 4.800 sec

NA = 12

Solvent = CDCl3

FID PTS1d = 21259

PTS1d = 32768

F1 = 499.858551 MHz

F2 = 125.700813 MHz

SW1 = 8503.40 Hz

AT1 = 2.50 sec

Hz per Pt 1stID = 0.26 Hz

SW2 = 1.00 Hz

Hz per Pt 2ndID = 1.00 Hz

O1 = 2495.9019 Hz

O2 = -0.5000 Hz

LB1 = 0.00 Hz

TP A = 49.69

B = -11.25

C = 0.00

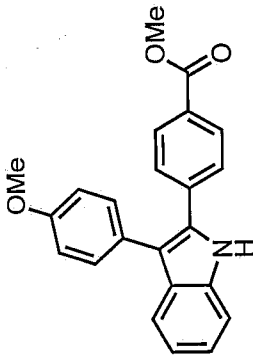

2k

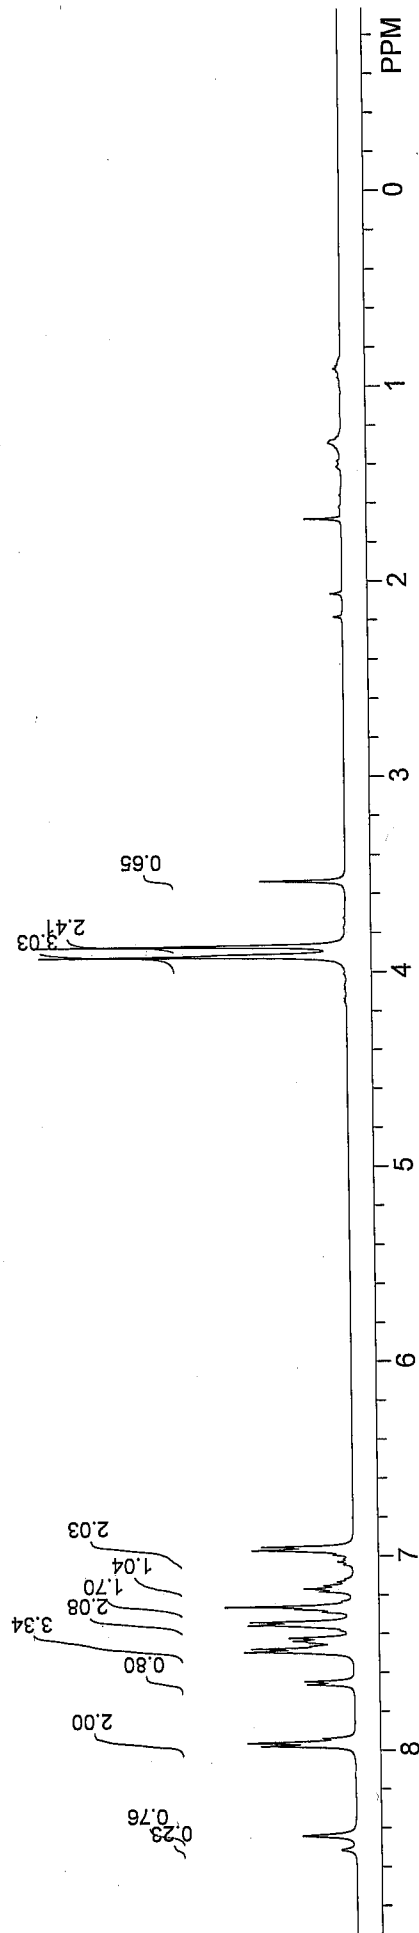

C:\Users\zhanglab1\Desktop\NMR\NMRitus 20080731\DATA\lyd-1-290-2-C.fid

lyd-1-290-2-C

Apr 28 2011

USER:

SOLVENT: CDCl3

Experiment = s2pul

Pulse length = 7.000 usec

Relaxation delay = 1.000 sec

NA = 512

Solvent = CDCl3

FID PTS1d = 39295

PTS1d = 65536

F1 = 125.702103 MHz

F2 = 499.858551 MHz

SW1 = 30165.91 Hz

AT1 = 1.30 sec

Hz per Pt 1stD = 0.46 Hz

SW2 = 1.00 Hz

Hz per Pt 2ndD = 1.00 Hz

O1 = 13197.3711 Hz

O2 = -0.5000 Hz

LB1 = 2.00 Hz

TP A = 63.28

B = 127.97

C = 0.00

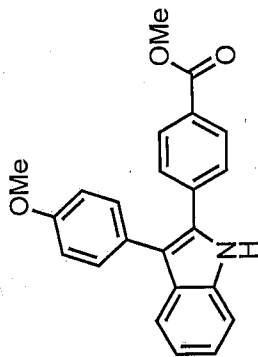

**2k**

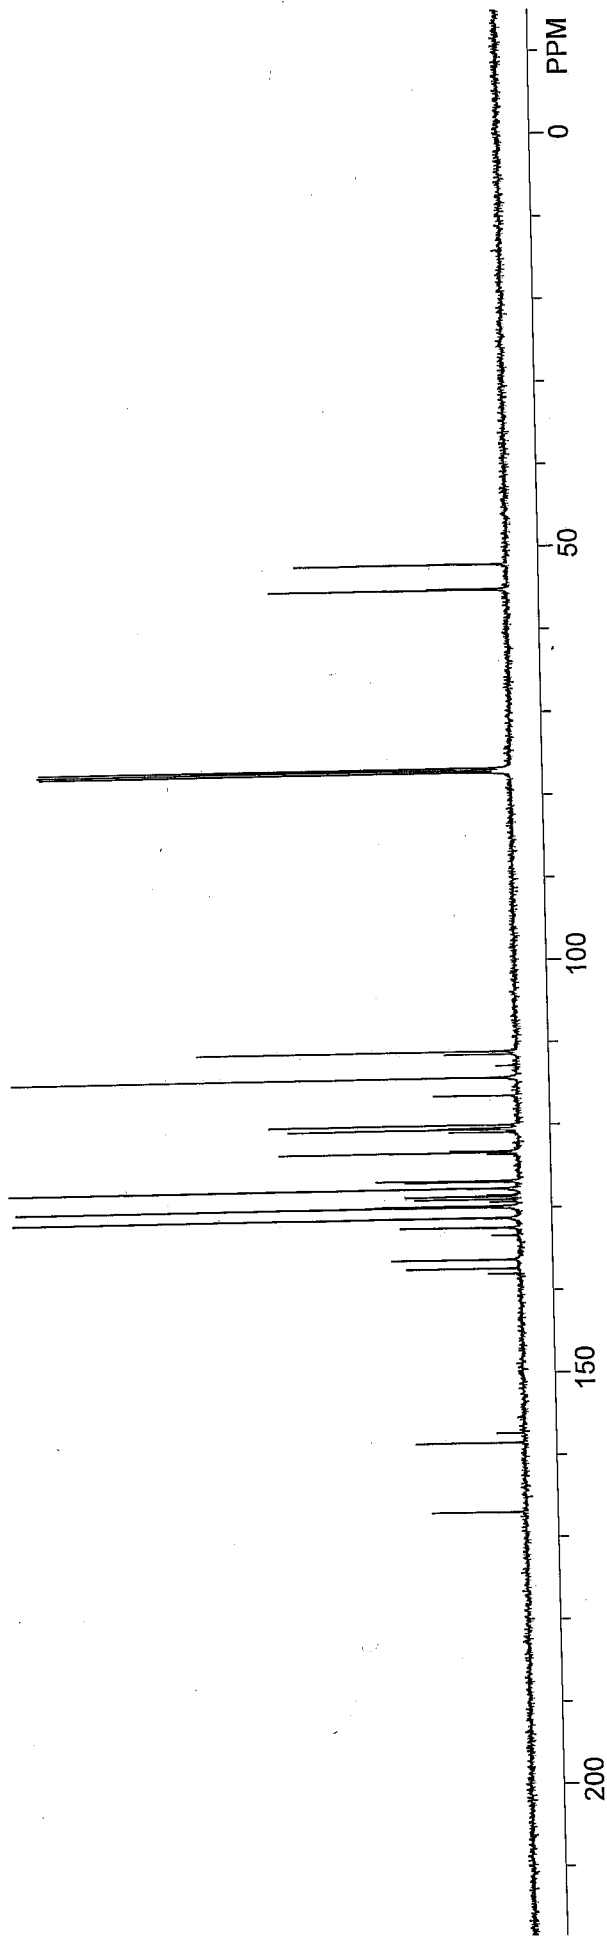

D:\Greenware\Nlus 20080731\DATA\S\wyz3-256-pro-h1.fid

new experiment

Apr 29 2011

USER:

SOLVENT: cdcl3

Experiment = s2pul

Pulse length = 11.863 usec

Relaxation delay = 2.000 sec

NA = 18

Solvent = cdcl3

PTPS1 = 0.0006

PTC = 0.765

F1 = 300.950884 MHz

F2 = 100.575279 MHz

SWH = 8002.40 Hz

AT1 = 2.50 sec

Hz per Pt 1sid = 0.24 Hz

SW2 = 1.00 Hz

Hz per Pt 2ind = 1.00 Hz

O1 = 2006.7504 Hz

O2 = -0.5000 Hz

LB1 = 0.00 Hz

TP A = -36.75

B = -39.03

C = 0.00

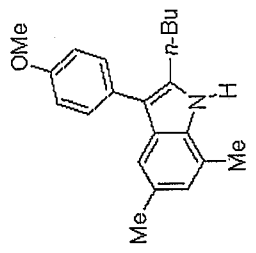

21

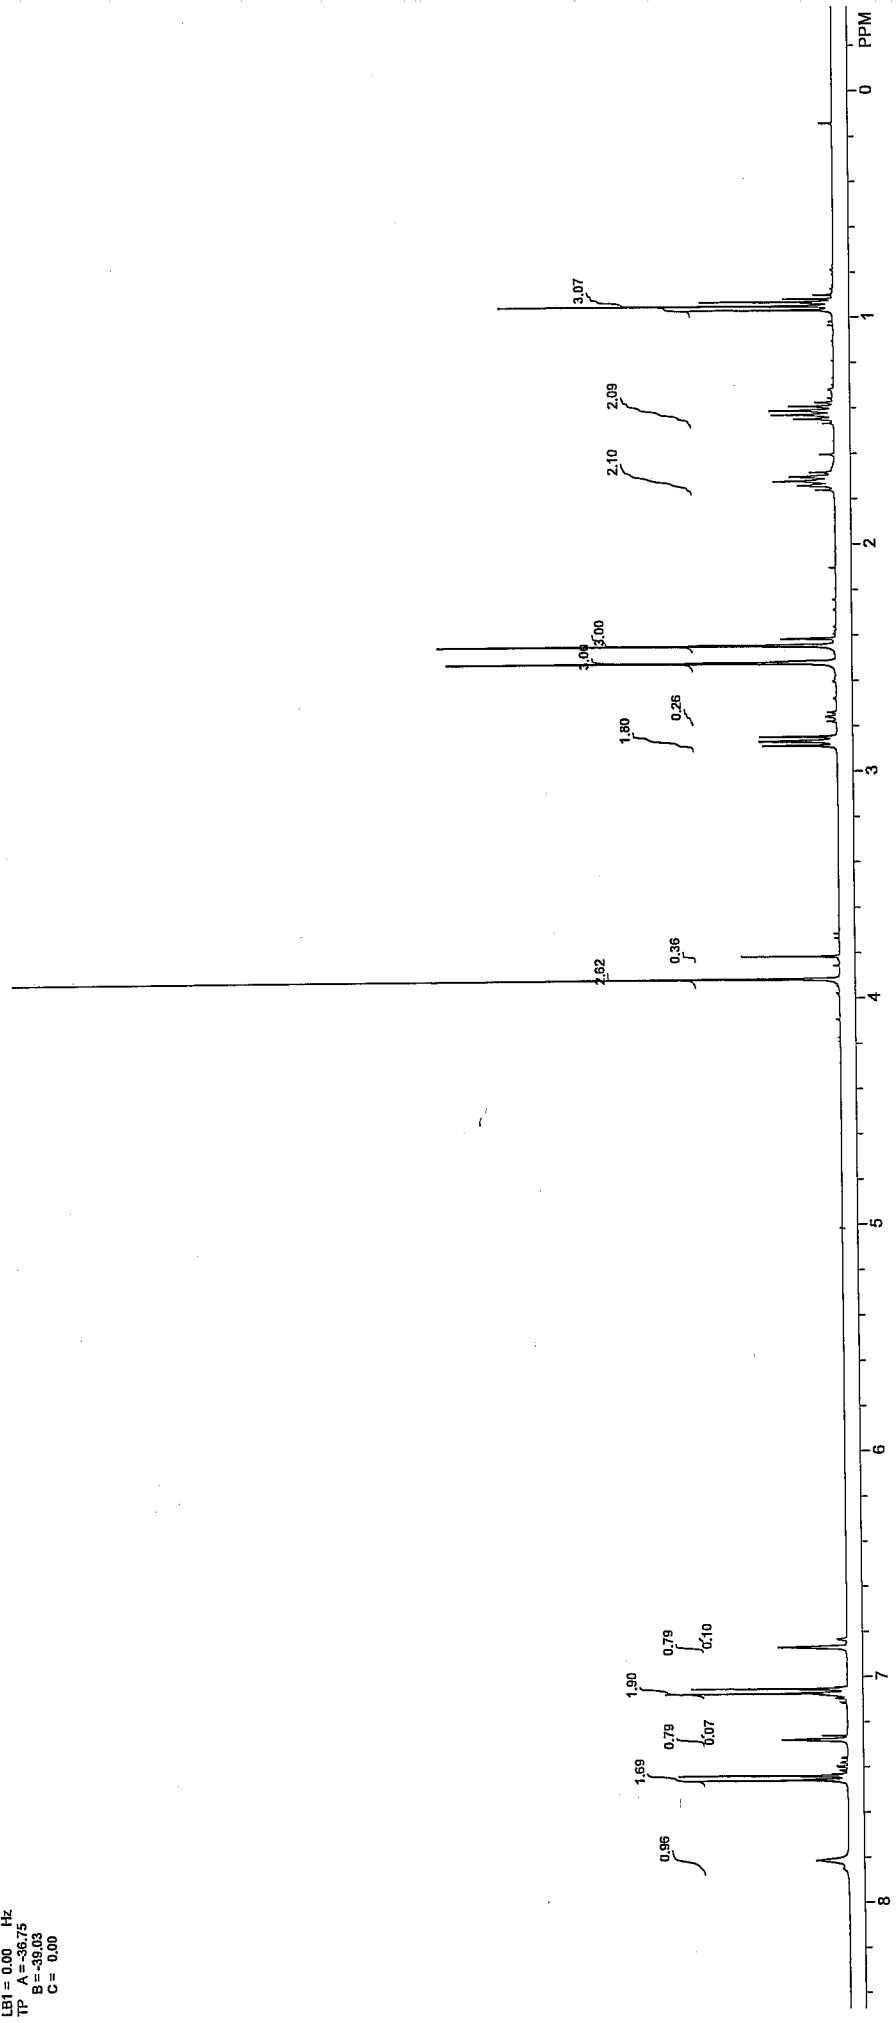

D:\Greenw@kNus 20080731\DATA\Swy3-255-pro-c13.fid  
Standard c13 run using qnp probe  
USER:

SOLVENT: cdcl3  
Experiment = s2pul  
Pulse length = 7.775 usec  
Relaxation delay = 1.300 sec  
NA = 132  
Solvent = cdcl3  
FID PTD = 28040  
F1 = 100.577232 MHz  
F2 = 399.350684 MHz  
SMT = 28040.56 Hz  
A11 = 1.00 usec  
B1 = 1.00 Hz  
SVA = 1.00 Hz  
Hz per Pt2000 = 1.00 Hz  
O1 = 10049.5137 Hz  
O2 = -0.5000 Hz  
LB1 = 2.00 Hz  
TP A = -37.97  
C = 0.00

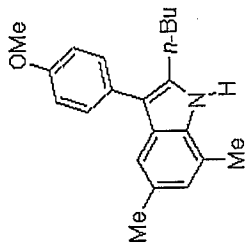

21

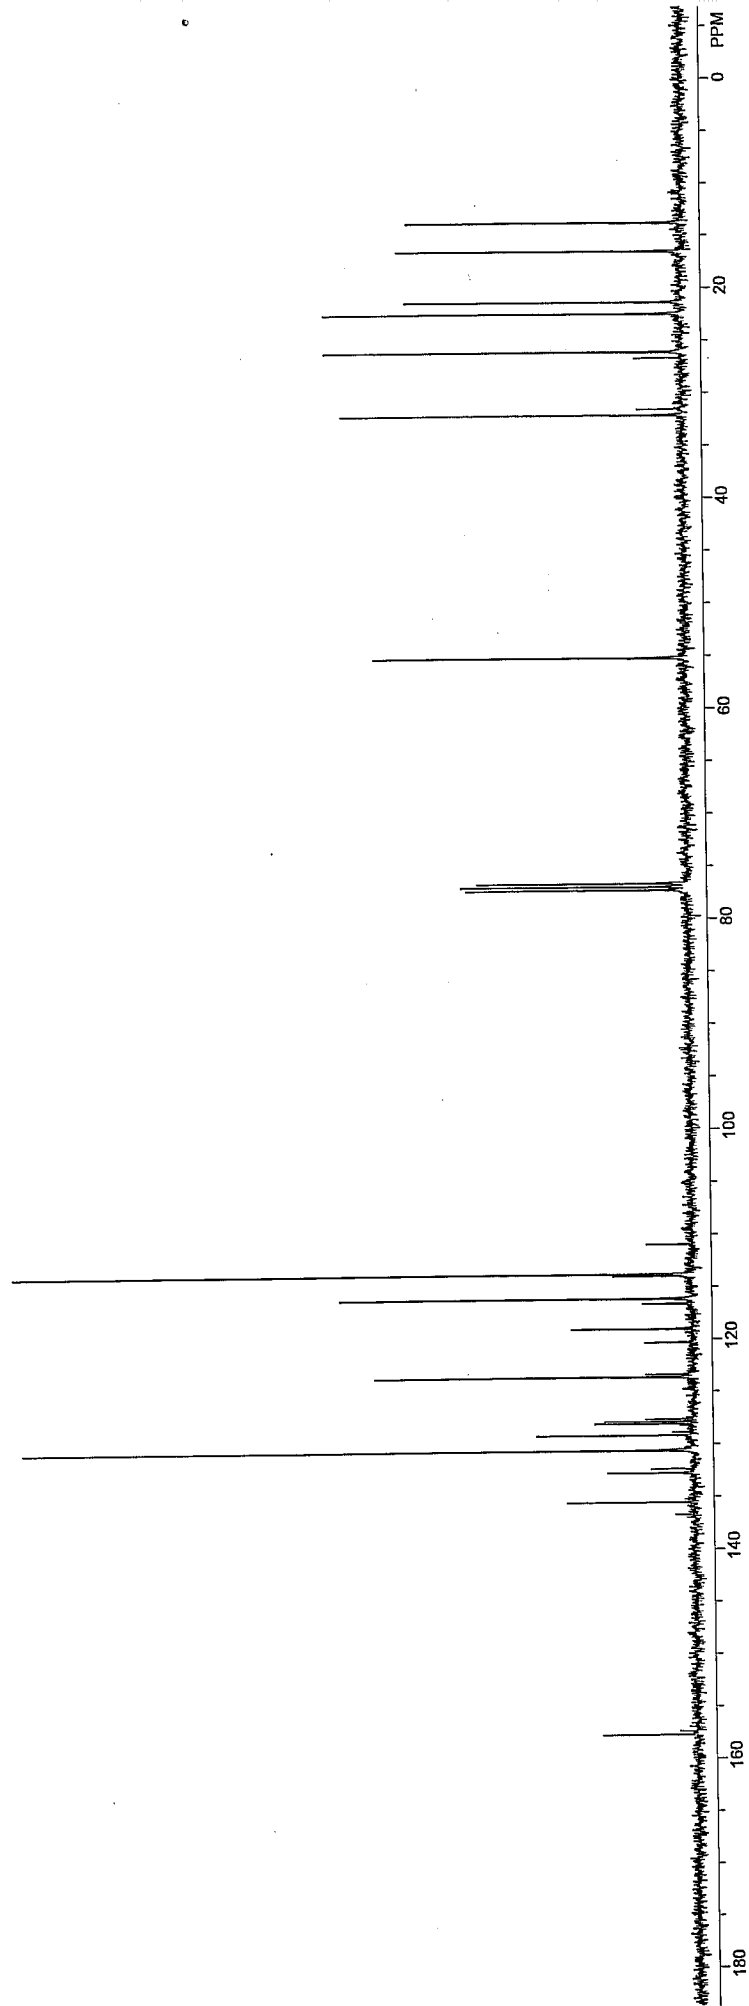

1b-IV-38

exp1 s2pul

|             |            |       |            |
|-------------|------------|-------|------------|
| date        | May 1 2011 | dn    | C13        |
| solvent     | cdcl3      | dof   | -1425.0    |
| file        | exp        | dm    | nnn        |
| ACQUISITION |            | chmm  | c          |
| sfrq        | 399.951    | dmf   | 200        |
| tn          | HI         |       | PROCESSING |
| at          | 2.500      | lb    | 0.20       |
| np          | 40012      | fn    | 65536      |
| sw          | 8002.4     | math  | i          |
| fb          | not used   |       |            |
| bs          | 2          | werr  |            |
| pw          | 11.7       | wexp  |            |
| pw          | 11.7       | wbs   |            |
| tpwr        | 60         | wnt   |            |
| dl          | 4.800      |       | DISPLAY    |
| tof         | 0          | sp    | -467.3     |
| nt          | 16         | wp    | 4441.3     |
| ct          | 16         | vs    | 75         |
| alock       | n          | sc    | 0          |
| gain        | not used   | wc    | 250        |
| FLAGS       |            | hznmm | 17.77      |
| il          | n          | is    | 188.75     |
| in          | n          | rfl   | 4812.3     |
| dp          | y          | rfp   | 2903.6     |
| hs          | nn         | th    | 3          |
|             | ins        |       | 3.000      |
|             | ai         | ph    |            |

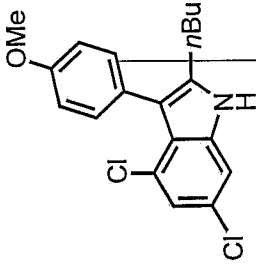

2m

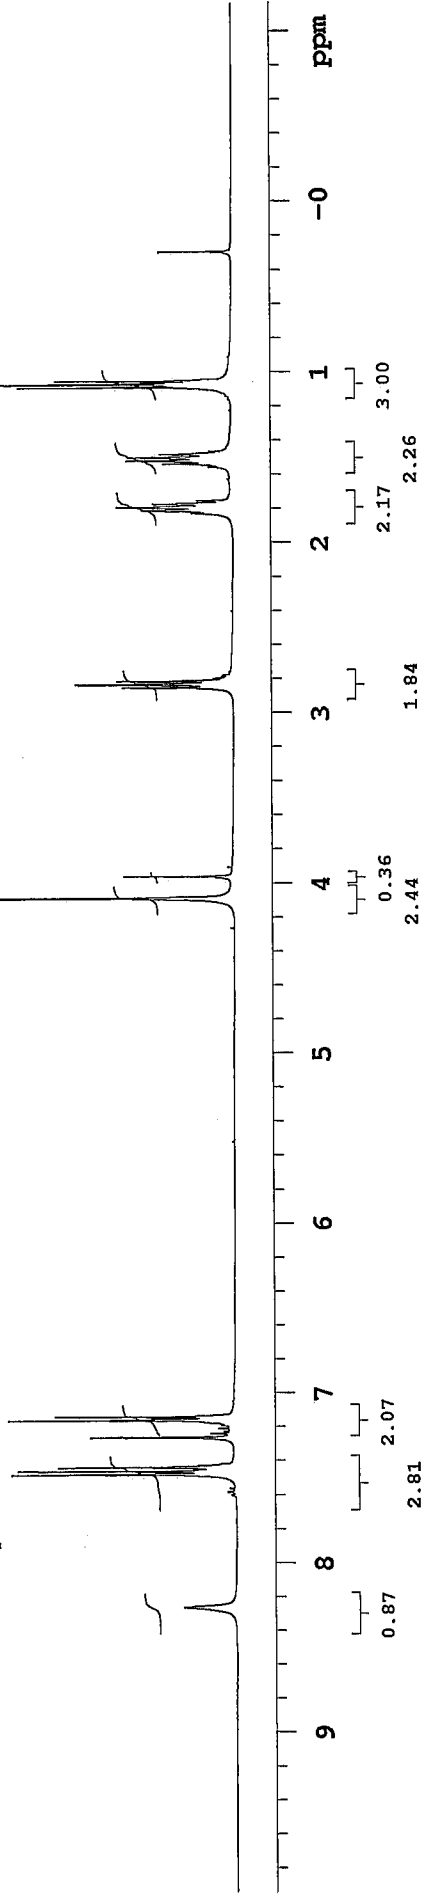

1b-IV-38-C13

expl std13c

SAMPLE DEC. & VT  
date May 1 2011 dfrq 399.951  
solvent cdcl3 dn H1  
file exp dpwr 40  
ACQUISITION dof 0  
sfrq 100.577 dm YYY  
tn Cl3 dmm w  
at 1.000 dmf 6700  
np 56080 dseq  
sw 28040.7 dres 90.0  
fb not used homo n  
bs 4 PROCESSING  
ss 4 lb 1.00  
tpwr 58 wtfile  
pw 7.8 proc ft  
dl 1.300 fn 65536  
tof 525.7 math f  
nt 1000  
ct 256 werr  
alock n wexp  
gain 44 wbs  
wnt

il n  
in n  
dp y  
hs nn

DISPLAY

sp -1381.9  
wp 21732.2  
vs 7925  
sc 0  
wc 250  
hzmm 86.93  
is 500.00  
rfl 11708.1  
rfp 7743.7  
th 4  
ins 100.000  
ai ph

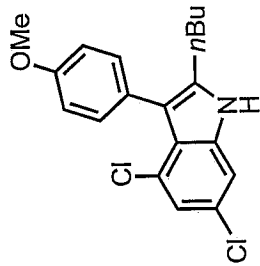

2m

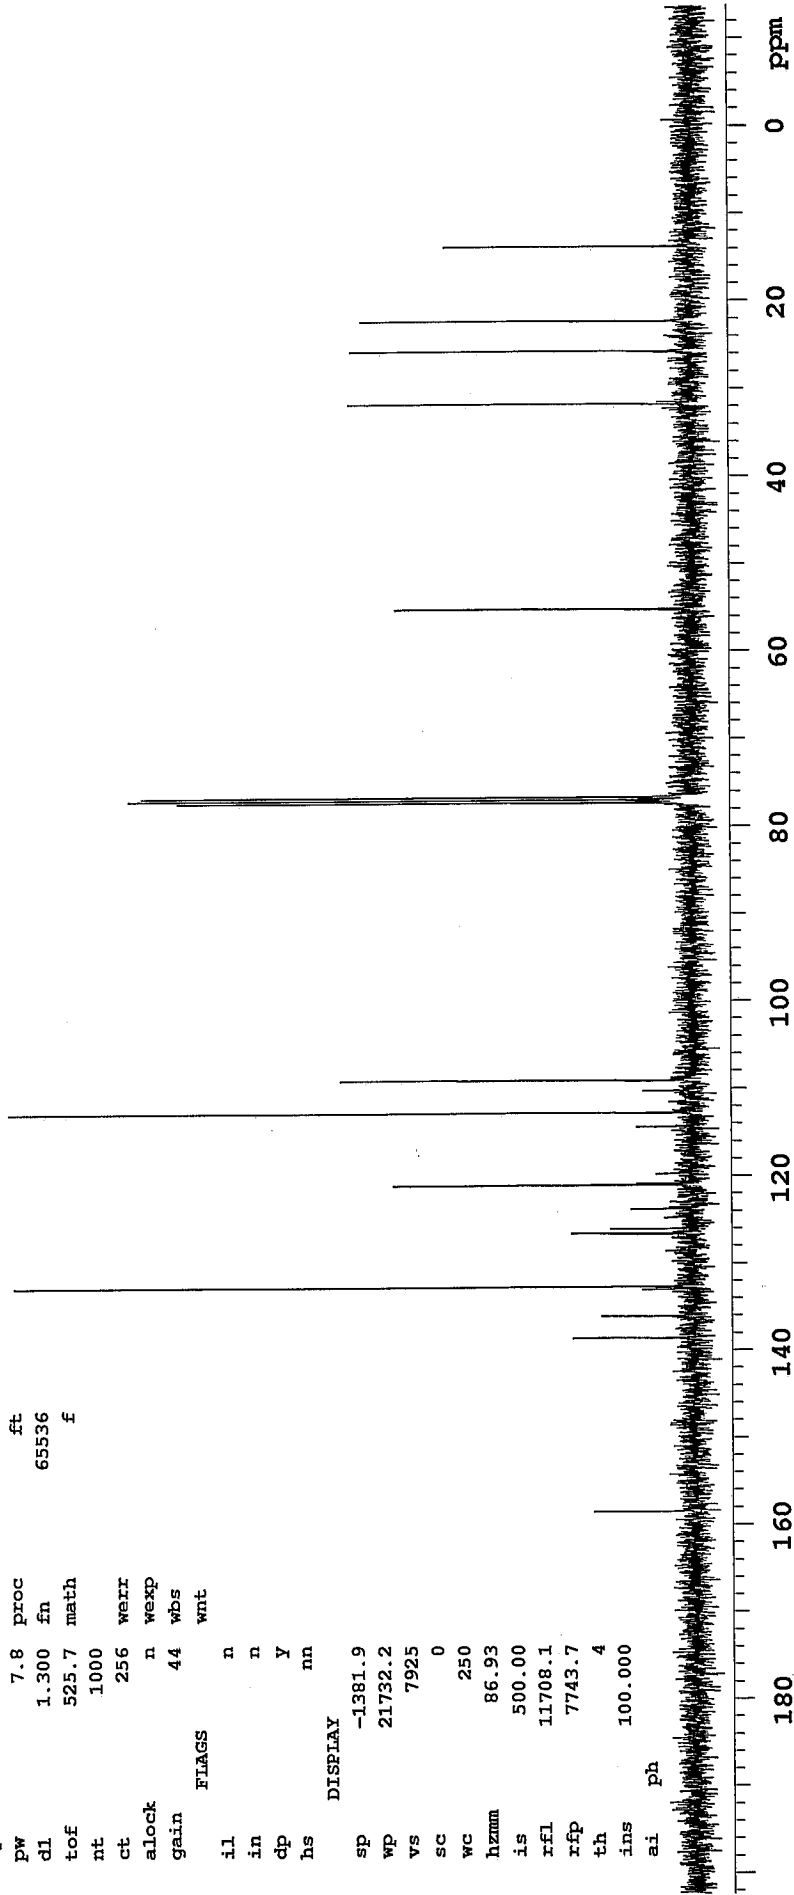

nt=8  
pw=pw90

exp1 s2pul

SAMPLE SPECIAL  
date Apr 30 2011 temp 25.0  
solvent cdcl3 gain not used  
file exp spin not used  
ACQUISITION hst 0.008  
sw 10000.0 pw90 7.000  
at 2.500 alfa 6.600  
np 50000 FLAGS  
fb not used il n  
bs 2 in n  
dl 4.800 dp y  
nt 16 hs nn  
ct 14 PROCESSING  
TRANSMITTER lb 0.20  
tn H1 fn 32768  
sfrq 599.635 DISPLAY  
tof -402.5 sp -251.0  
tpwr 53 wp 6231.7  
pw 5.825 rfl 2404.4  
DECOUPLER rfp 0  
dn H1 ip -113.5  
dof 0 lp -7.7  
dm nnn PLOT  
dum c wc 250  
dpwr 0 sc 0  
dmf 200 vs 52  
th ai 3  
ph

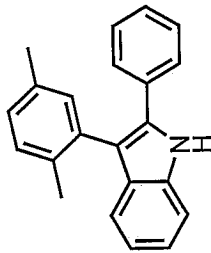

5a

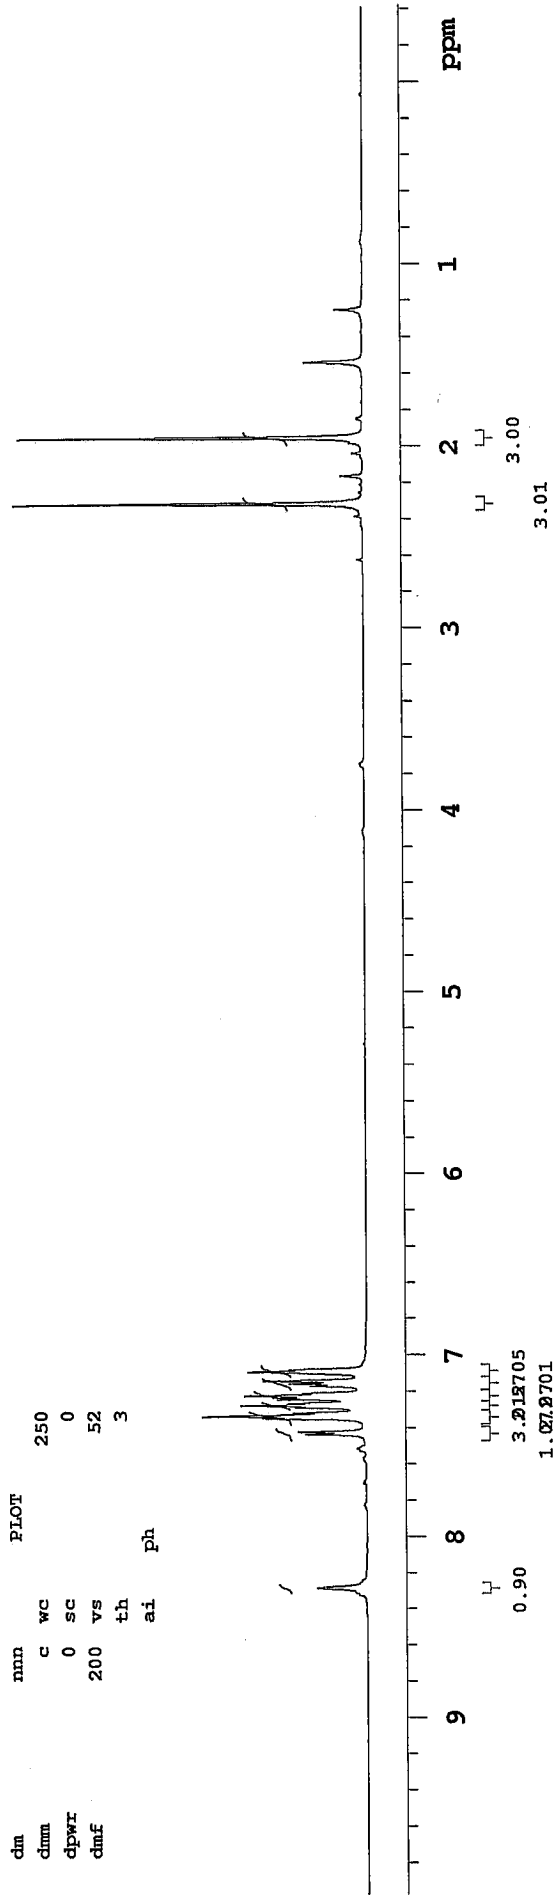



Standard c13 run using qnp probe

exp1 std13c

SAMPLE DEC. & VT  
date Apr 29 2011 dfrq 399.951  
solvent cdcl3 dn H1  
file exp dpwr 40  
ACQUISITION dof 0  
sfrq 100.577 dm YYY w  
tn C13 dmm w 6700  
at 1.000 dmf 6700  
np 56080 dseq  
sw 28040.7 dres 90.0  
fb not used homo n  
bs 4 PROCESSING  
ss 4 lb 1.00  
tpwr 58 wfile  
pw 7.8 proc ft  
dl 1.300 fn 65536  
tof 525.7 math f  
nt 8000  
ct 8000 weir  
alock n wexp  
gain 44 wbs  
FLAGS wnt  
il n  
in n  
dp y  
hs nn

DISPLAY  
sp -1426.6  
wp 21252.1  
vs 21512  
sc 0  
wc 250  
hzmm 85.01  
is 500.00  
ifl 11707.5  
rfp 7743.7  
th 5  
ins 100.000  
ai ph

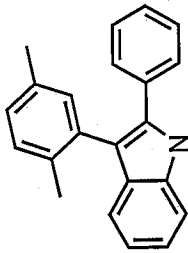

5a

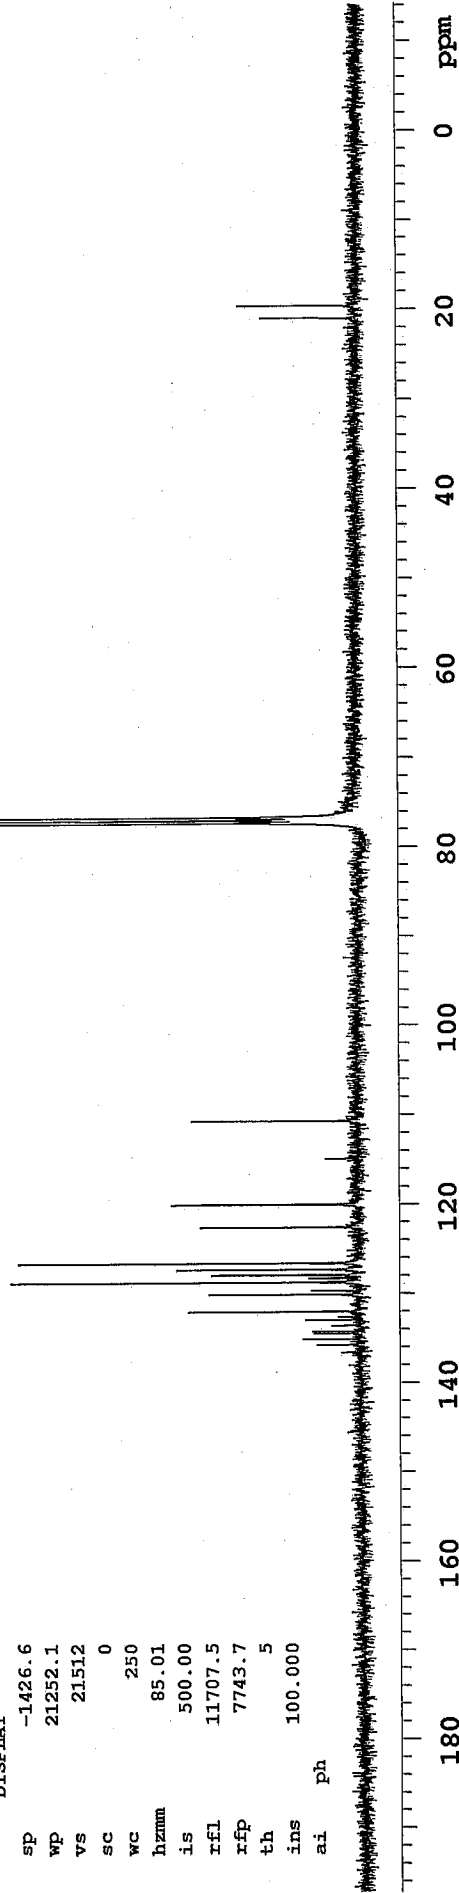

C:\Users\zhang\_laptop\Desktop\NMR\ntis\DATA\1z-1-158-1h.fid

H1\_CDCL3U

Apr\_28\_2011

USER:

SOLVENT: CDCl3

Experiment = s2pul

Pulse length = 7.700 usec

Relaxation delay = 4.800 sec

NA = 16

Solvent = CDCl3

FID PTS1d = 21259

PTS1d = 32768

F1 = 499.858551 MHz

F2 = 125.700813 MHz

SW1 = 8503.40 Hz

AT1 = 2.50 sec

Hz per Pt 1stD = 0.26 Hz

SW2 = 1.00 Hz

Hz per Pt 2ndD = 1.00 Hz

O1 = 2495.9019 Hz

O2 = -0.5000 Hz

LB1 = 0.00 Hz

TP A = 43.48

B = -19.48

C = 0.00

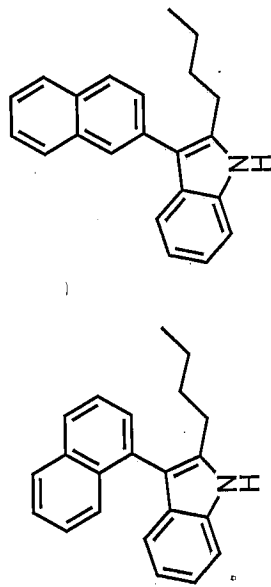

1

5b'

6

5b

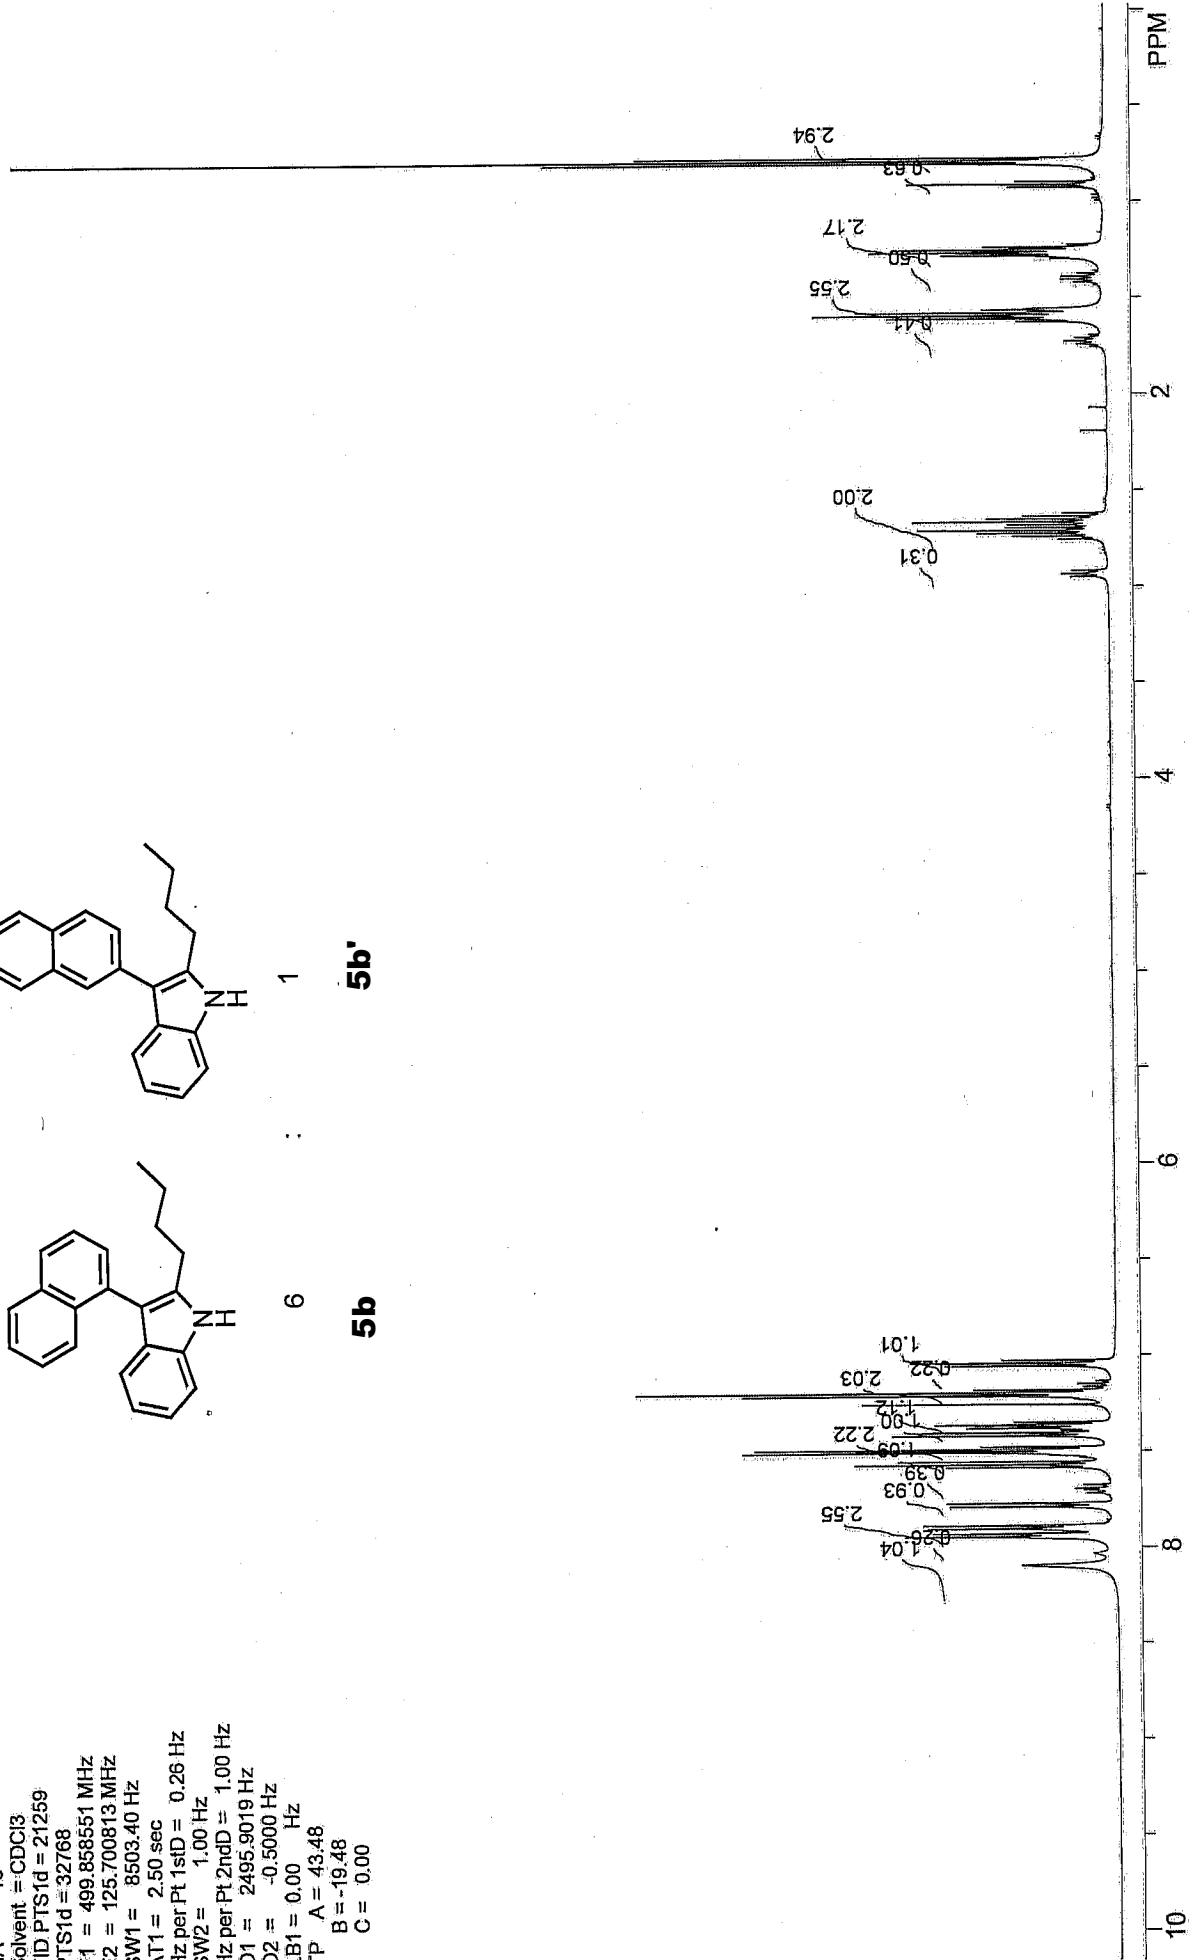

C:\Users\zhang laptop\Desktop\NMR\NMR  
 he-1-19-cJ  
 Apr 27 2011  
 USER:  
 SOLVENT: cdcl3  
 Experiment = s2pul  
 Pulse.length = 6.000 usec  
 Relaxation delay = 3.000 sec  
 NA = 278  
 Solvent = cdcl3  
 FID PTS1d = 52018  
 PTS1d = 65536  
 F1 = 125.701683 MHz  
 F2 = 499.858551 MHz  
 SW1 = 40000.00 Hz  
 AT1 = 1.30 sec  
 Hz per Pt1std = 0.61 Hz  
 SW2 = 1.00 Hz  
 Hz per Pt2ndd = 1.00 Hz  
 O1 = 12777.2832 Hz  
 O2 = -0.5000 Hz  
 LB1 = 2.00 Hz  
 TP A = 139.22  
 B = 94.22  
 C = 0.00

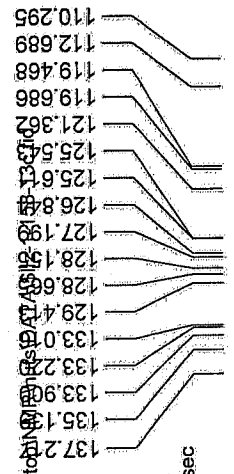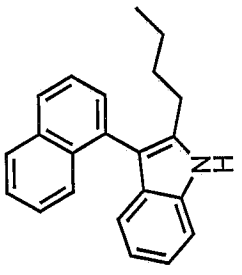

**5b**

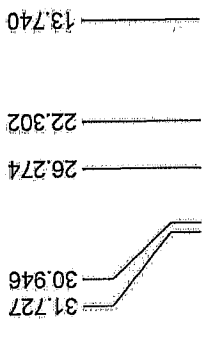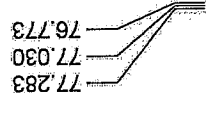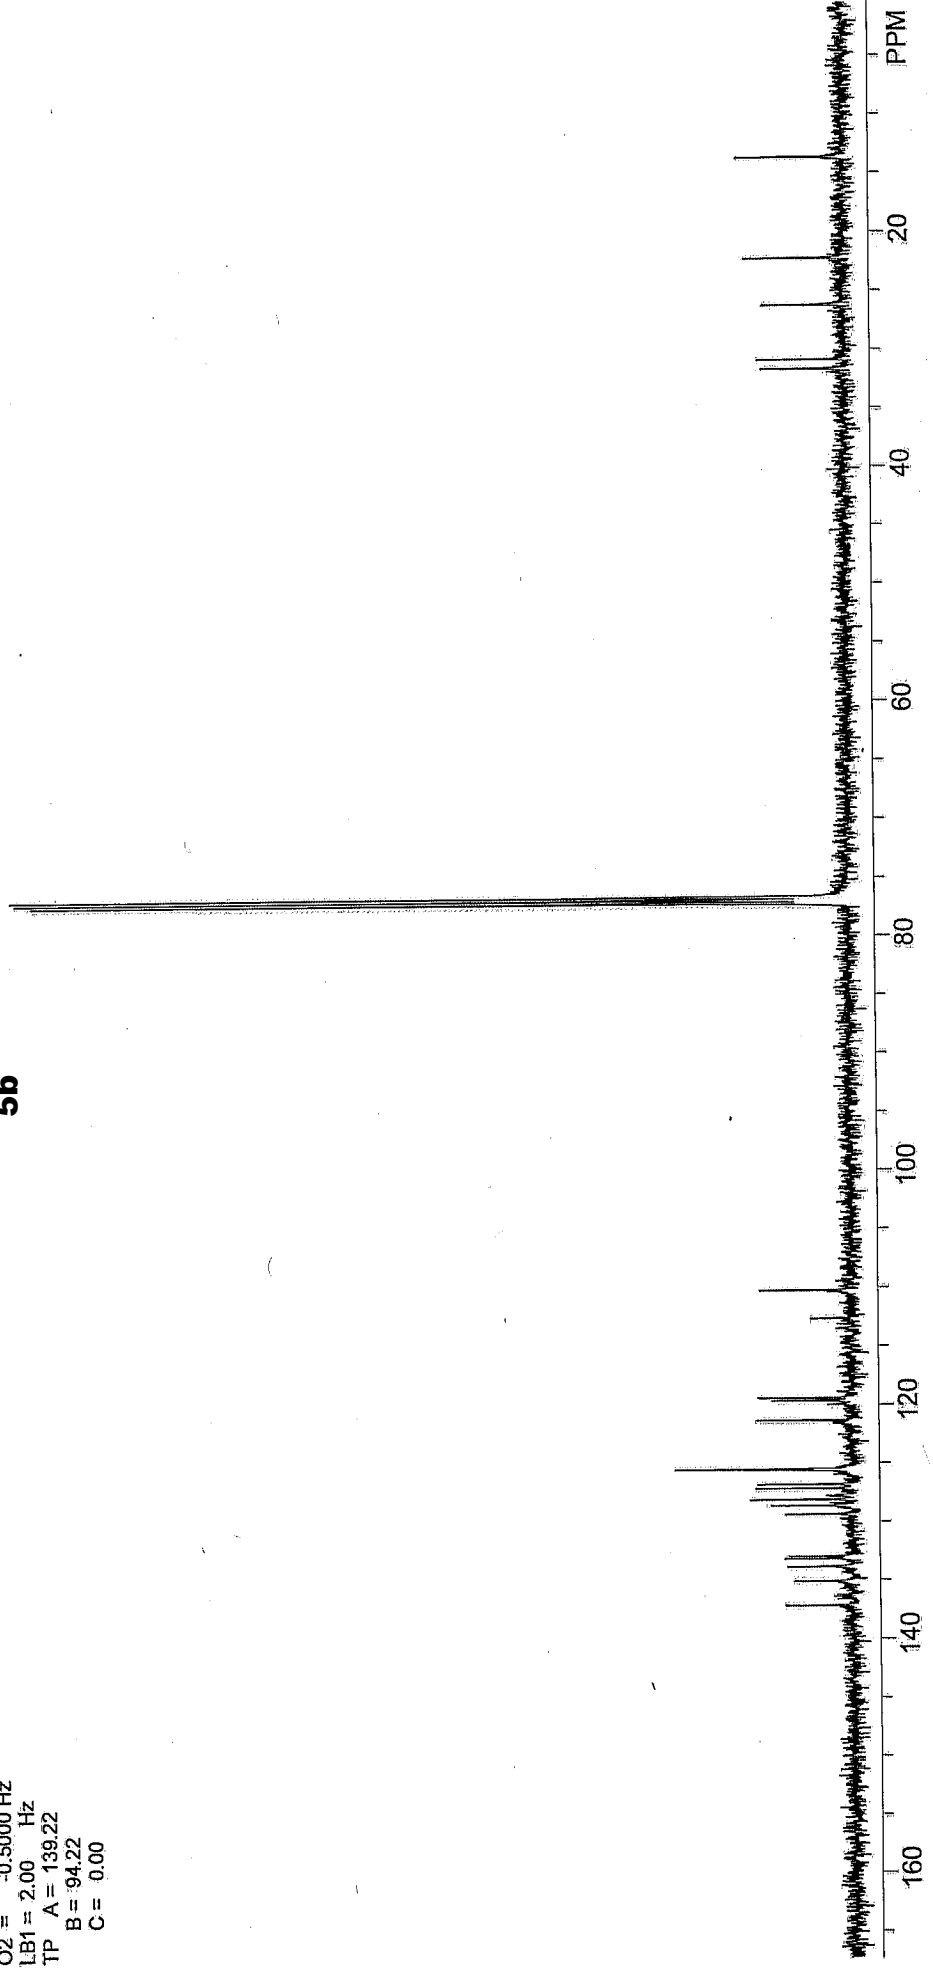

C:\Users\zhang\_laptop\Desktop\NMR\units\DATA\sliz-1-133-1-up-1h.fid

new experiment  
Apr 23 2011  
USER:  
SOLVENT: cddc3  
Experiment = s2pul  
Pulse length = 11.663 usec  
Relaxation delay = 4.800 sec

NA = 16  
Solvent = cddc3  
FID PTS1d = 20006  
PTS1d = 32768  
F1 = 399.950684 MHz  
F2 = 100.575279 MHz  
SW1 = 8002.40 Hz  
AT1 = 2.50 sec  
Hz per Pt 1sID = 0.24 Hz  
SW2 = 1.00 Hz  
Hz per Pt 2ndID = 1.00 Hz  
O1 = 2006.7504 Hz  
O2 = -0.5000 Hz  
LB1 = 0.00 Hz  
TP A = -40.44  
B = -41.36  
C = 0.00

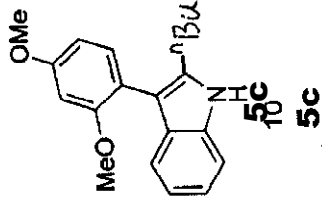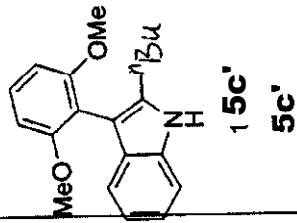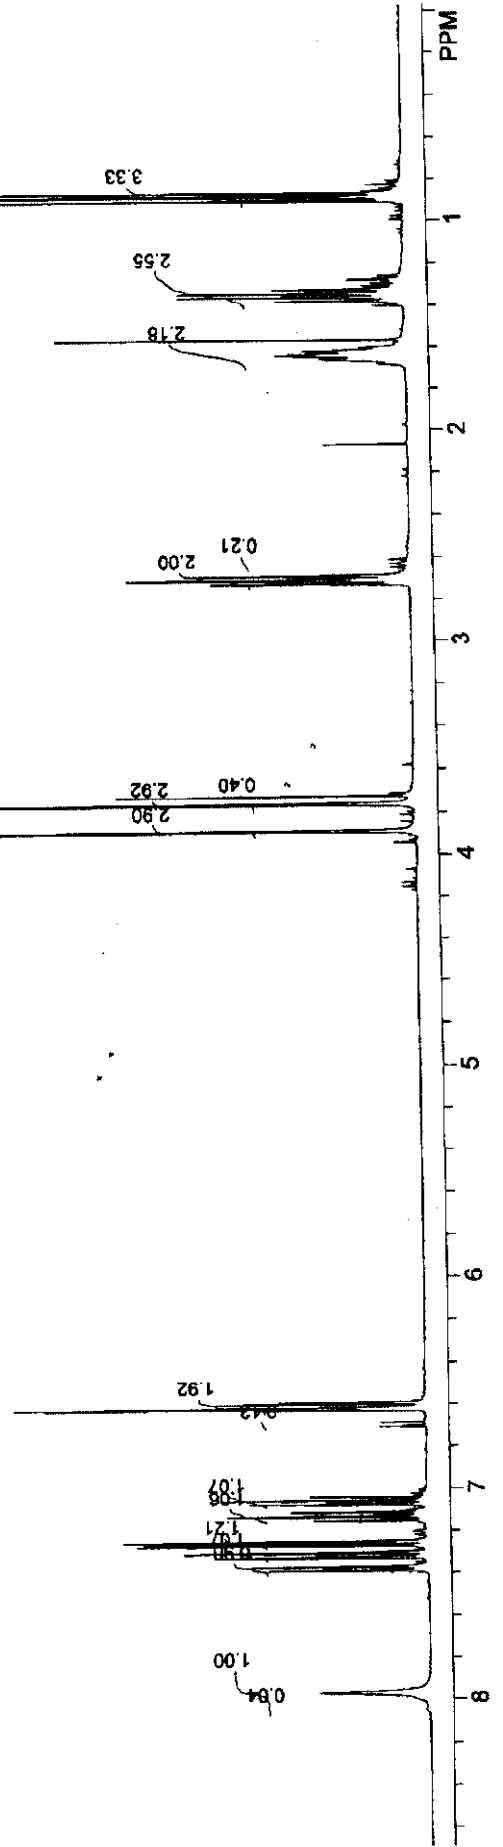



C:\Users\zhang\_laptop\Desktop\NMR\ntits\DATA\133-2-1h.fid

H1\_CDCL3U

Apr.22.2011

USER:

SOLVENT: CDCl3

Experiment = s2pd

Pulse length = 7.700 usec

Relaxation delay = 4.800 sec

NA = 16

Solvent = CDCl3

FID PTS1d = 21259

PTS1d = 32768

F1 = 499.858551 MHz

F2 = 125.700813 MHz

SW1 = 8503.40 Hz

AT1 = 2.50 sec

Hz per Pt 1stD = 0.26 Hz

SW2 = 1.00 Hz

Hz per Pt 2ndD = 1.00 Hz

O1 = 2495.9019 Hz

O2 = -0.5000 Hz

LB1 = 0.00 Hz

TP A = 54.89

B = -8.14

C = 0.00

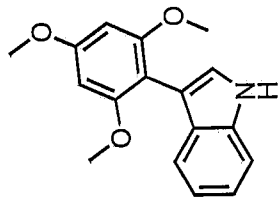

5d

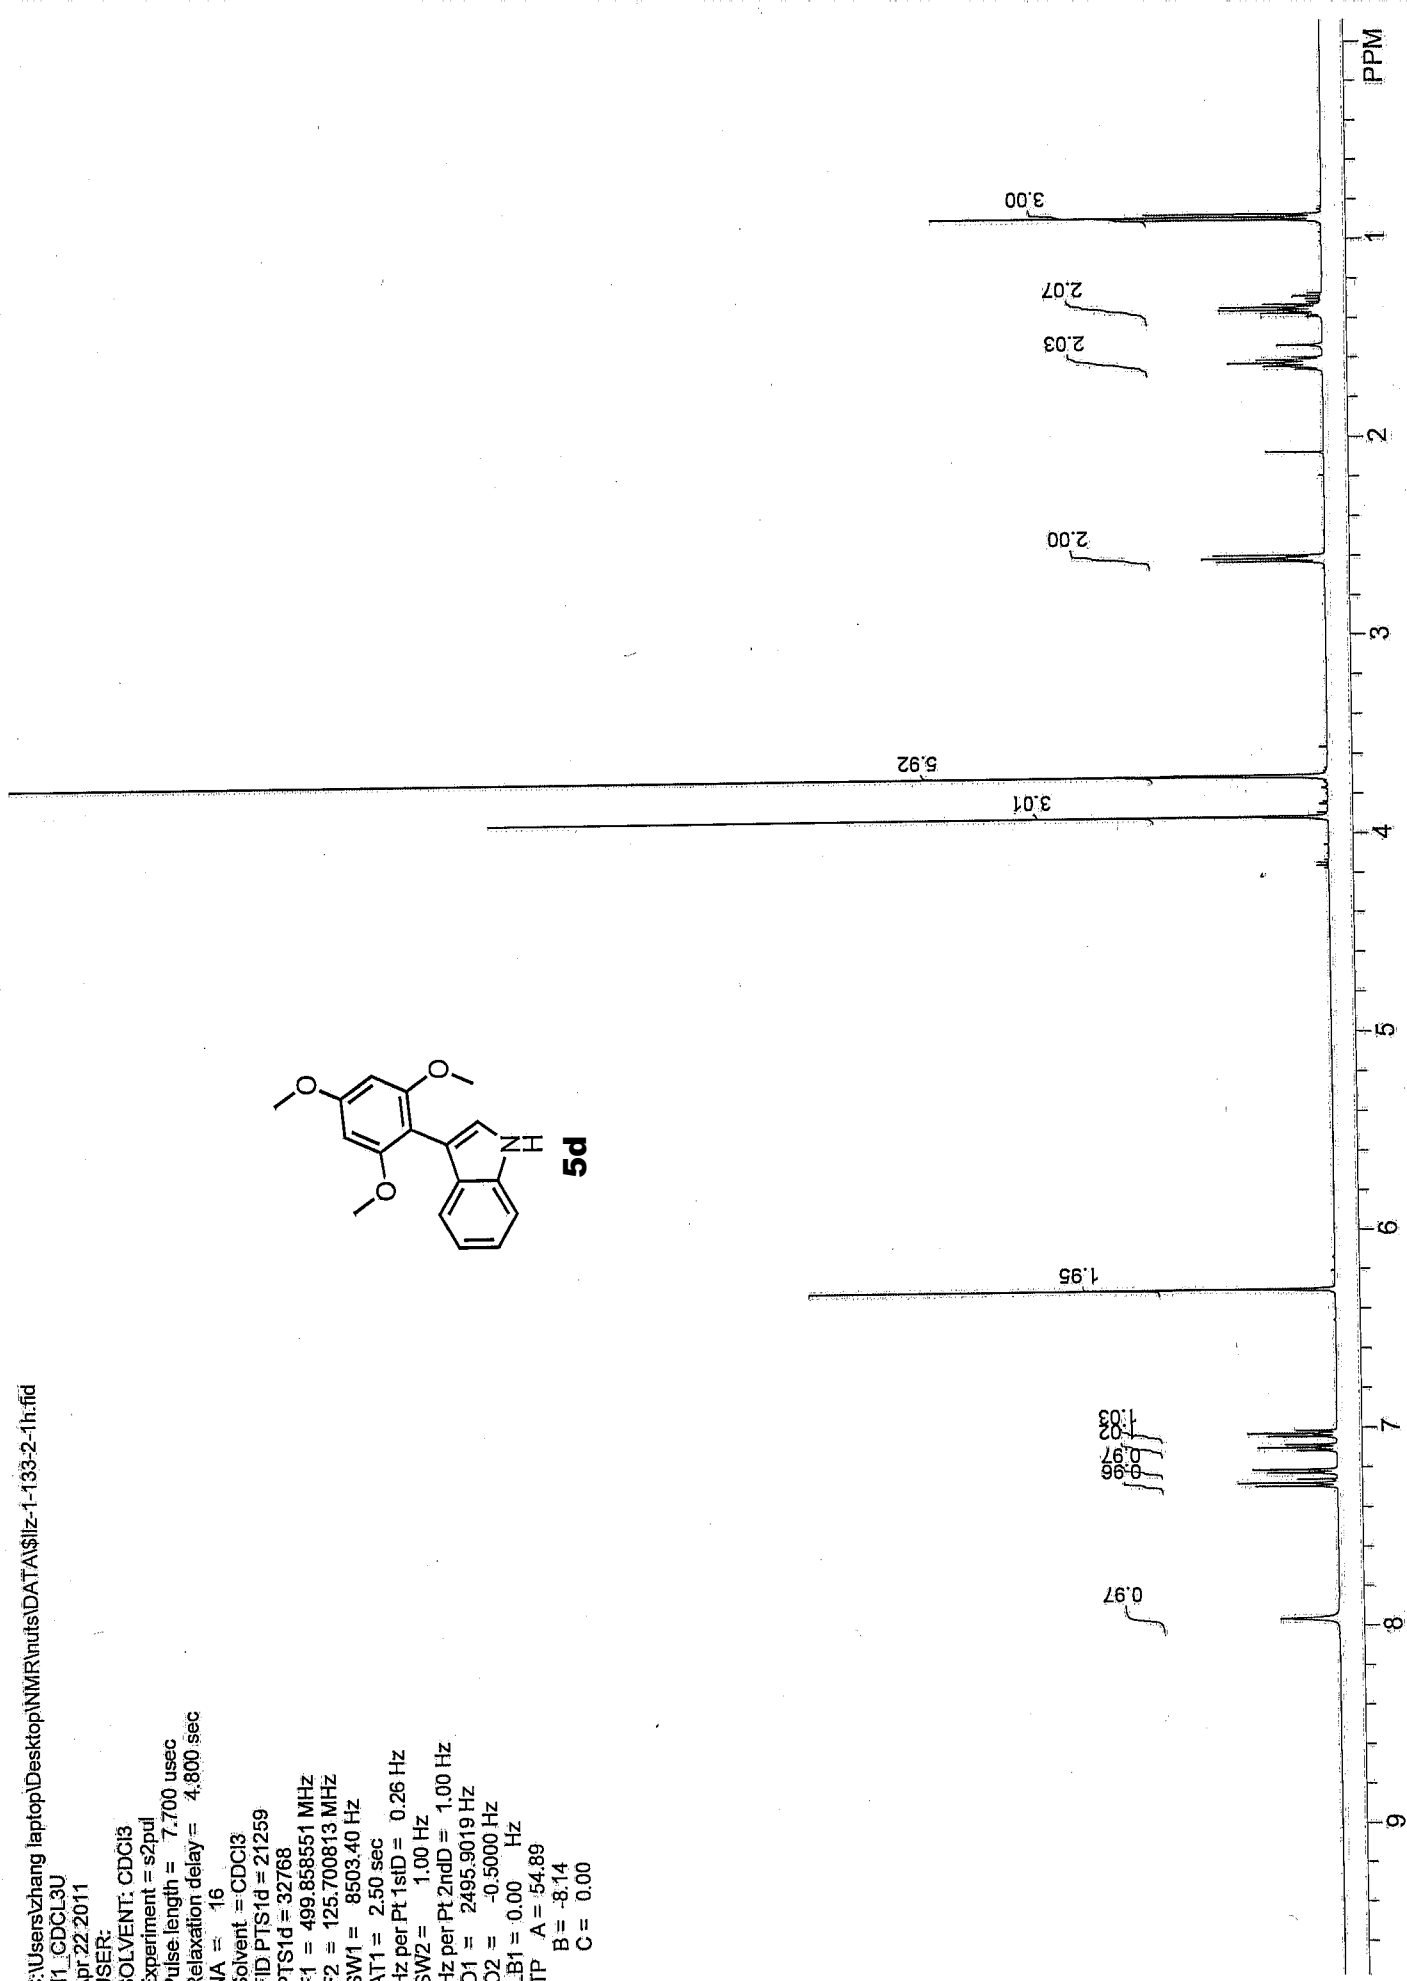



lb-IV-21-2

exp1 s2pul

SAMPLE DEC. & VT  
 date Apr 26 2011 dn C13  
 solvent CDCl3 dof 0  
 file exp dm nnn  
 ACQUISITION dnm c  
 sfrq 499.859 dmf 200  
 tn H1 PROCESSING  
 at 2.500 lb 0.20  
 np 42518 fn 32768  
 sw 8503.4 math i  
 fb not used  
 bs 2 weir  
 pw 7.7 wexp  
 tpwr 57 wnt  
 dl 4.800 DISPLAY  
 tof 0 sp -136.5  
 nt 32 wp 4402.2  
 ct 22 vs 71  
 alock n sc 0  
 gain not used wc 250  
 FLAGS hzmm 17.61  
 il n is 259.57  
 in n rfl 1755.8  
 dp y xfp 0  
 hs mn th 2  
 ins 1.600  
 ai ph

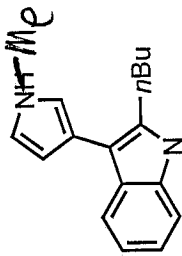

5e'

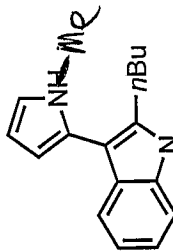

5e

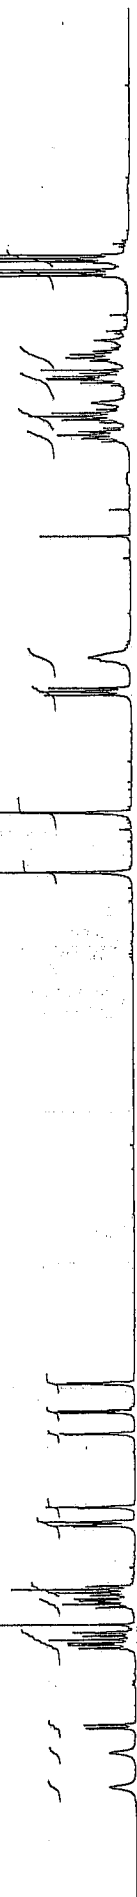

8 0.50 0.47 0.44 1.63 1.19 0.46 0.94 0.94 0.43 0.50 0.52  
 7 0.94 0.94 0.43 0.50 0.52  
 6 0.94 0.94 0.43 0.50 0.52  
 5  
 4 1.39 1.60  
 3 0.98 1.15  
 2 1.16 1.45 1.55 1.42 2.00  
 1 1.65



1b-IV-21-2-C13

exp1 Carbon

|             |             |            |          |
|-------------|-------------|------------|----------|
| SAMPLE      |             | SPECIAL    |          |
| date        | Apr 26 2011 | temp       | not used |
| solvent     | CDCl3       | gain       | 46       |
| file        | exp         | spin       | not used |
| ACQUISITION |             | hst        | 0.008    |
| sw          | 30165.9     | pw90       | 14.600   |
| at          | 1.303       | alfa       | 6.600    |
| np          | 78590       | FLAGS      |          |
| fb          | not used    | il         | n        |
| bs          | 4           | in         | n        |
| ss          | 2           | dp         | Y        |
| d1          | 1.000       | hs         | nn       |
| nt          | 10000       | PROCESSING |          |
| ct          | 296         | lb         | 0.50     |
| TRANSMITTER |             | fn         | not used |
| tn          | Cl3         | DISPLAY    |          |
| sfrq        | 125.702     | sp         | -641.9   |
| tof         | 1285.5      | wp         | 22952.6  |
| tpwr        | 57          | xf1        | 1885.6   |
| pw          | 7.000       | rfp        | 0        |
| DECOUPLER   |             | rp         | -52.1    |
| dn          | H1          | lp         | -220.5   |
| dof         | 0           | PLOT       |          |
| dm          | YYY         | wc         | 250      |
| dmm         | w           | sc         | 0        |
| dpwr        | 38          | vs         | 5834     |
| dmf         | 10000       | th         | 9        |
|             |             | ai         | cdc      |
|             |             | ph         |          |

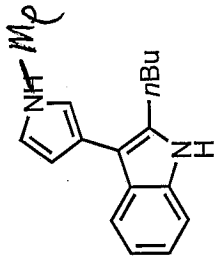

5e'

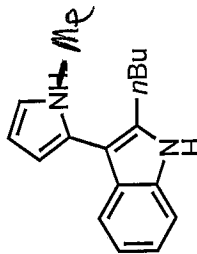

5e

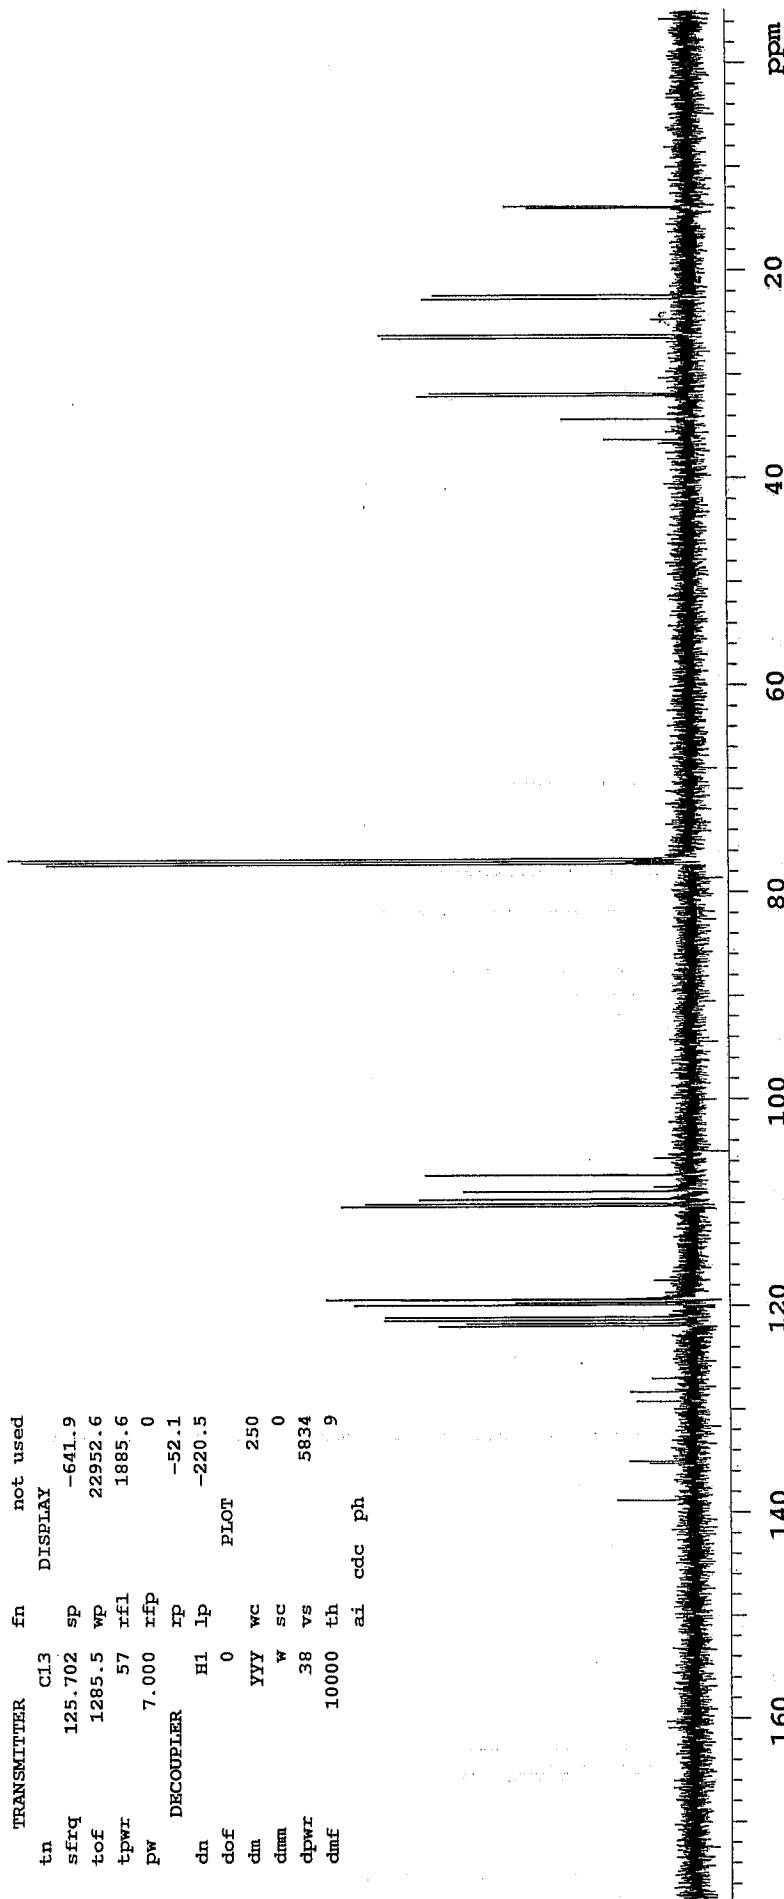



C:\Users\zhang laptop\Desktop\...  
 Std carbon:blank line7\_1  
 May 1 2011  
 USER:  
 SOLVENT: CDCl3  
 Experiment = s2pul  
 Pulse length = 7.000 usec  
 Relaxation delay = 1.000.sec  
 NA = 2660  
 Solvent = CDCl3  
 FID PTS1d = 39295  
 PTS1d = 65536  
 F1 = 125.702103 MHz  
 F2 = 499.858551 MHz  
 SW1 = 30165.91 Hz  
 AT1 = 1.30 sec  
 Hz per Pt 1stD = 0.46 Hz  
 SW2 = 1.00 Hz  
 Hz per Pt 2ndD = 1.00 Hz  
 O1 = 13197.3711 Hz  
 O2 = -0.5000 Hz  
 LB1 = 2.00 Hz  
 TP A = -185.63  
 B = 120.94  
 C = 0.00

136.0  
 133.5  
 133.0  
 129.3  
 128.4  
 127.9  
 127.2  
 124.0  
 122.6  
 122.3  
 120.3  
 119.9  
 118.5  
 111.7  
 110.6  
 110.0

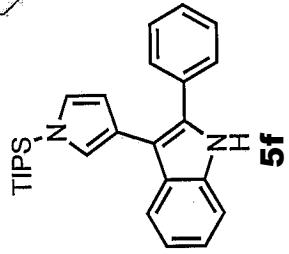

77.275  
 77.023  
 76.766

17.900  
 11.714

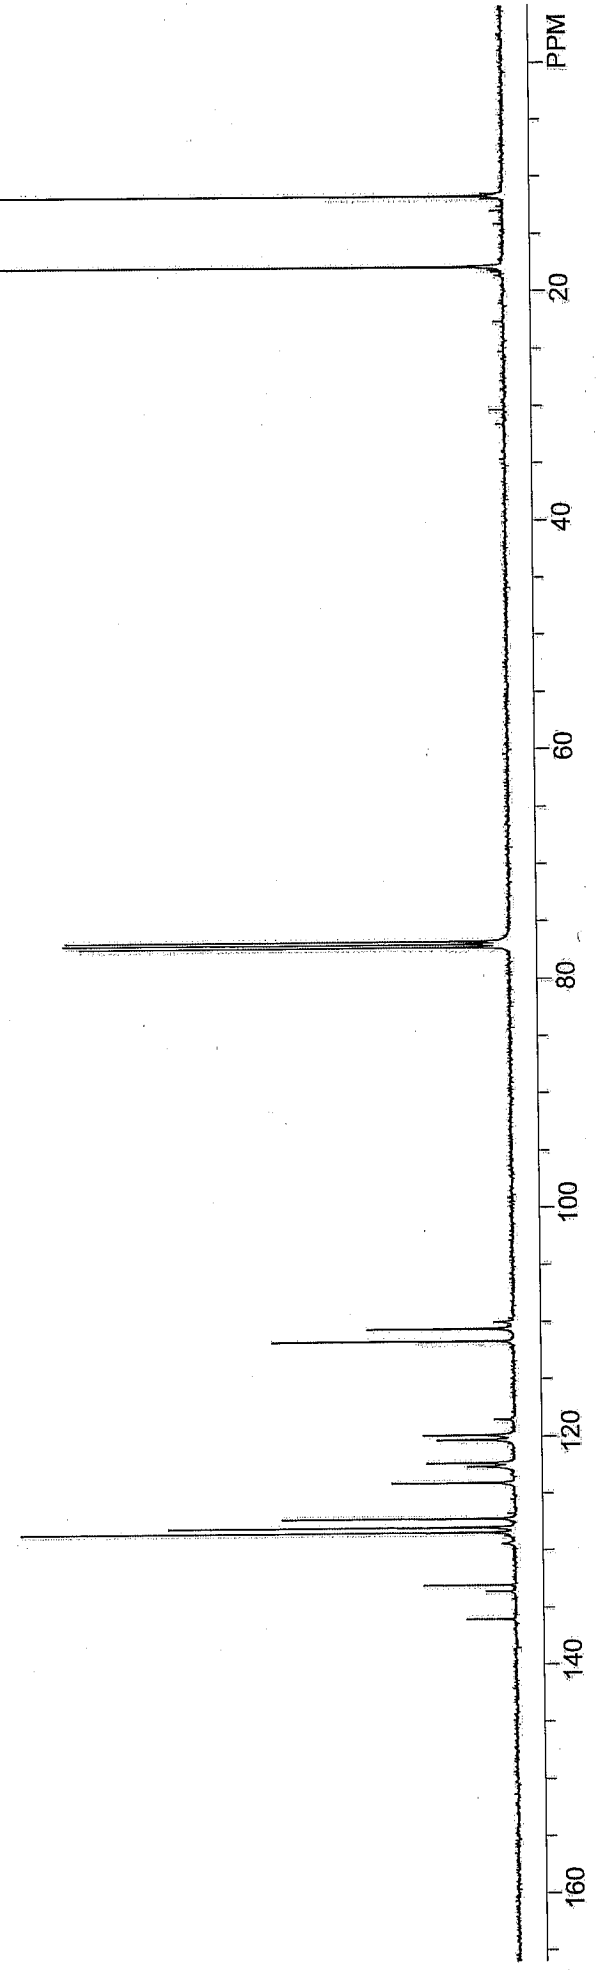

C:\Users\zhang\_laptop\Desktop\NMR\ntifs\DATA\lz-1-170-1h-dmso.fid

new experimentU

Apr.30.2011

USER:

SOLVENT: dmso

Experiment = s2pul

Pulse length = 11.660 usec

Relaxation delay = 4.800 sec

NA = 16

Solvent = dmso

FID PTS1d = 20006

PTS1d = 32768

F1 = 399.952576 MHz

F2 = 100.575760 MHz

SW1 = 8002.40 Hz

AT1 = 2.50 sec

Hz per Pt 1stID = 0.24 Hz

SW2 = 1.00 Hz

Hz per Pt 2ndID = 1.00 Hz

O1 = 2039.5610 Hz

O2 = -0.5000 Hz

LB1 = 0.00 Hz

TP A = -36.91

B = -31.60

C = 0.00

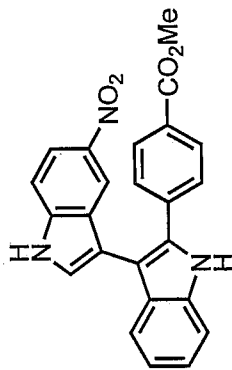

5g

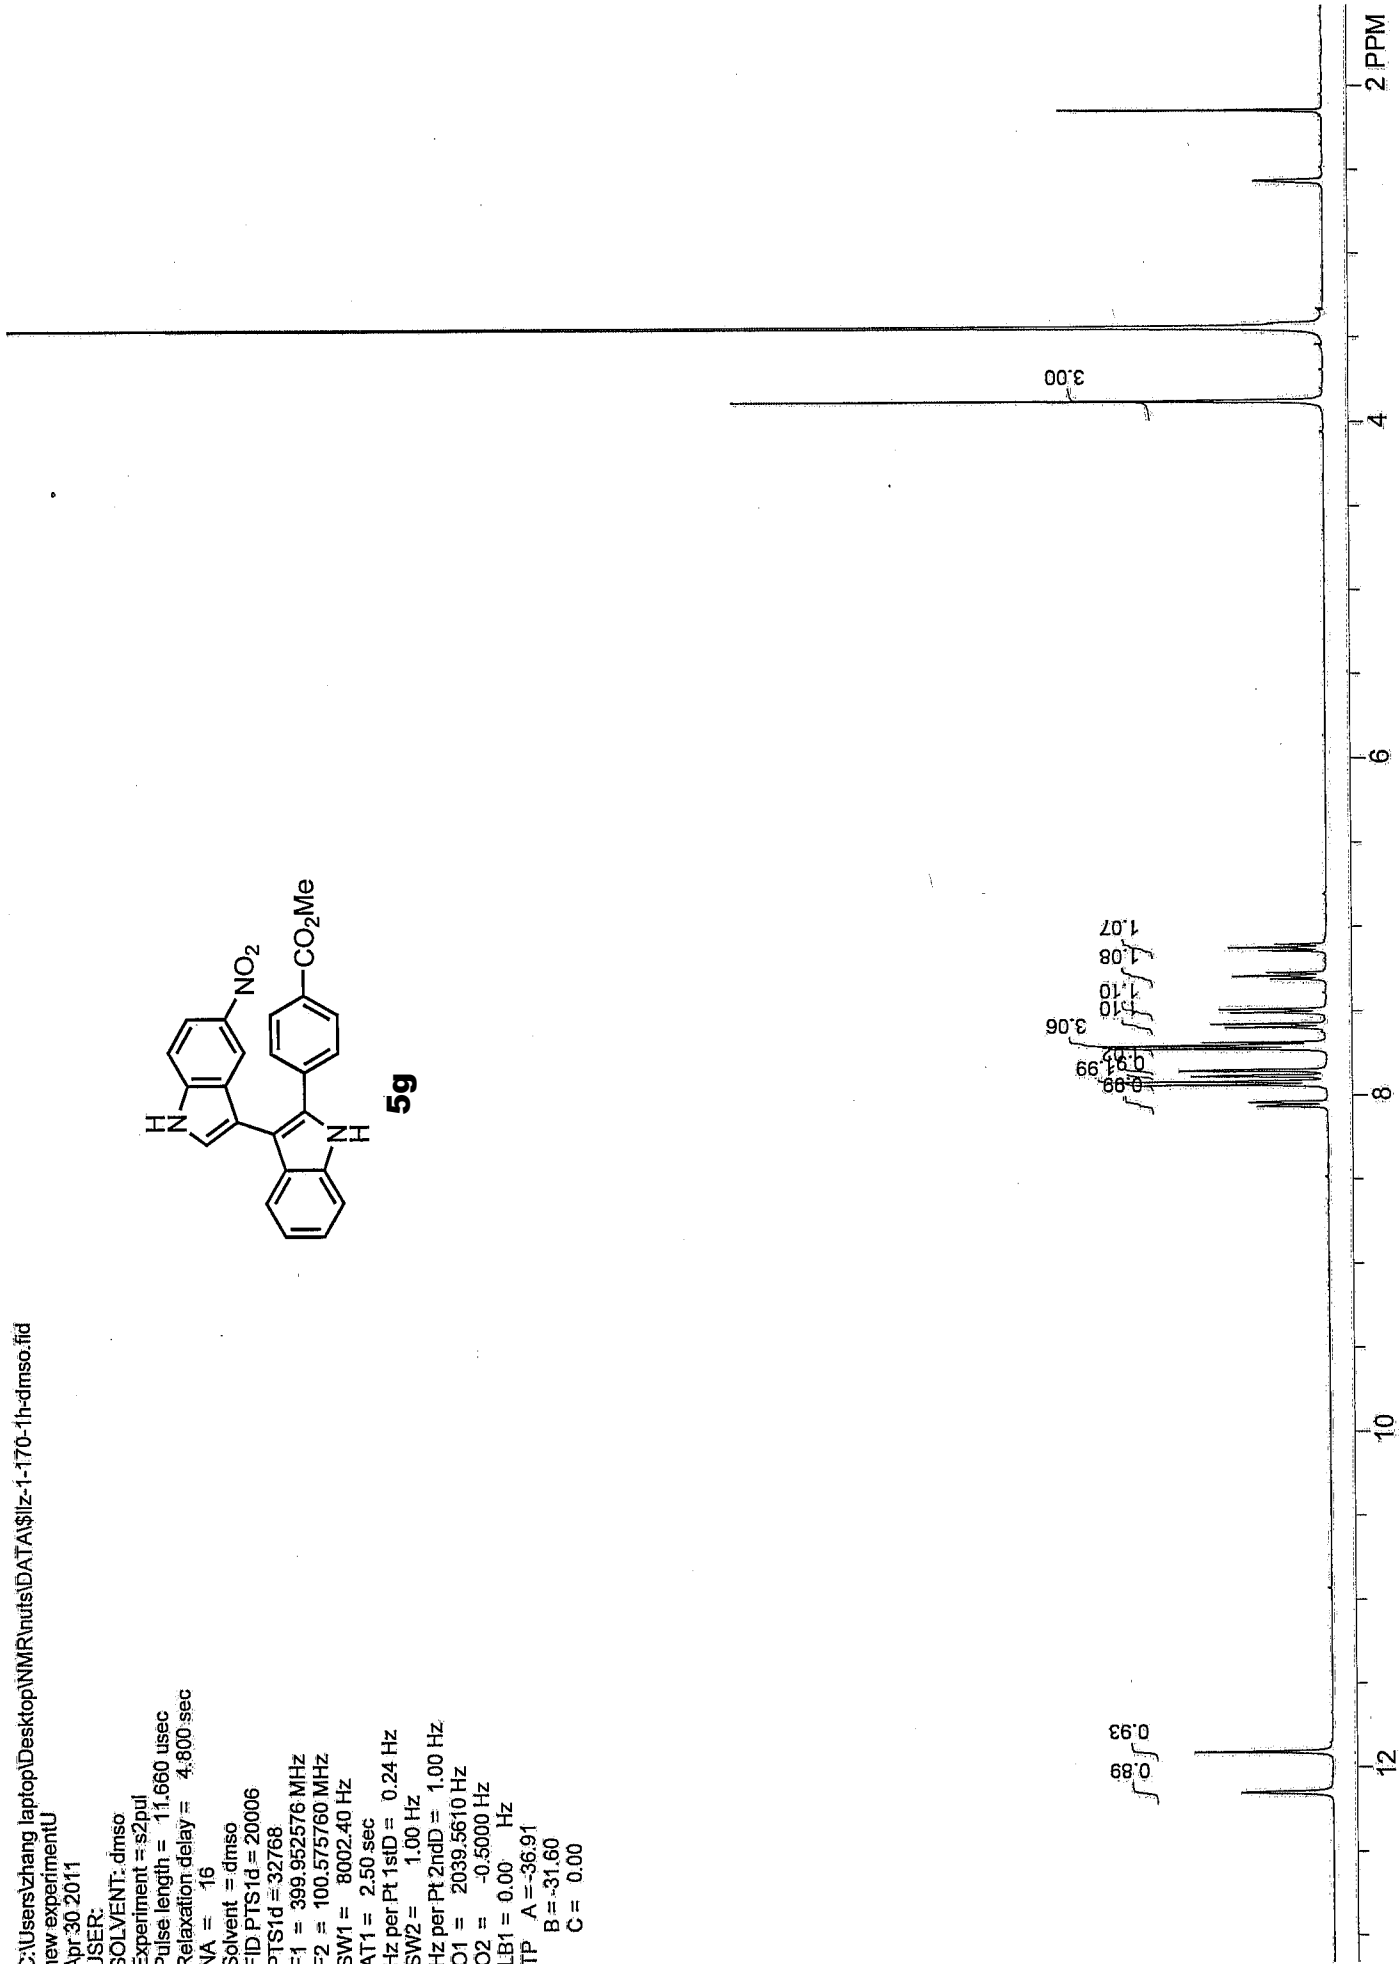



C:\Users\zhang\_laptop\Desktop\NMR\inputs\DATA\1h\z-1-indolecace-inacetone-1h.fid

Apr 29 2011

USER:  
SOLVENT: acetone  
Experiment = s2pul  
Pulse length = 11.663 usec  
Relaxation delay = 4.800 sec  
NA = 16  
Solvent = acetone  
FID.PTS1d = 20006  
PTS1d = 32768  
F1 = 399.952759 MHz  
F2 = 100.575806 MHz  
SW1 = 8002.40 Hz  
AT1 = 2.50 sec  
Hz per Pt 1stD = 0.24 Hz  
SW2 = 1.00 Hz  
Hz per Pt 2ndD = 1.00 Hz  
O1 = 3692.8281 Hz  
O2 = -0.5000 Hz  
LB1 = 0.00 Hz  
TP A = -34.69  
B = -42.19  
C = 0.00

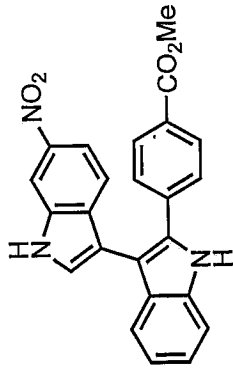

5h

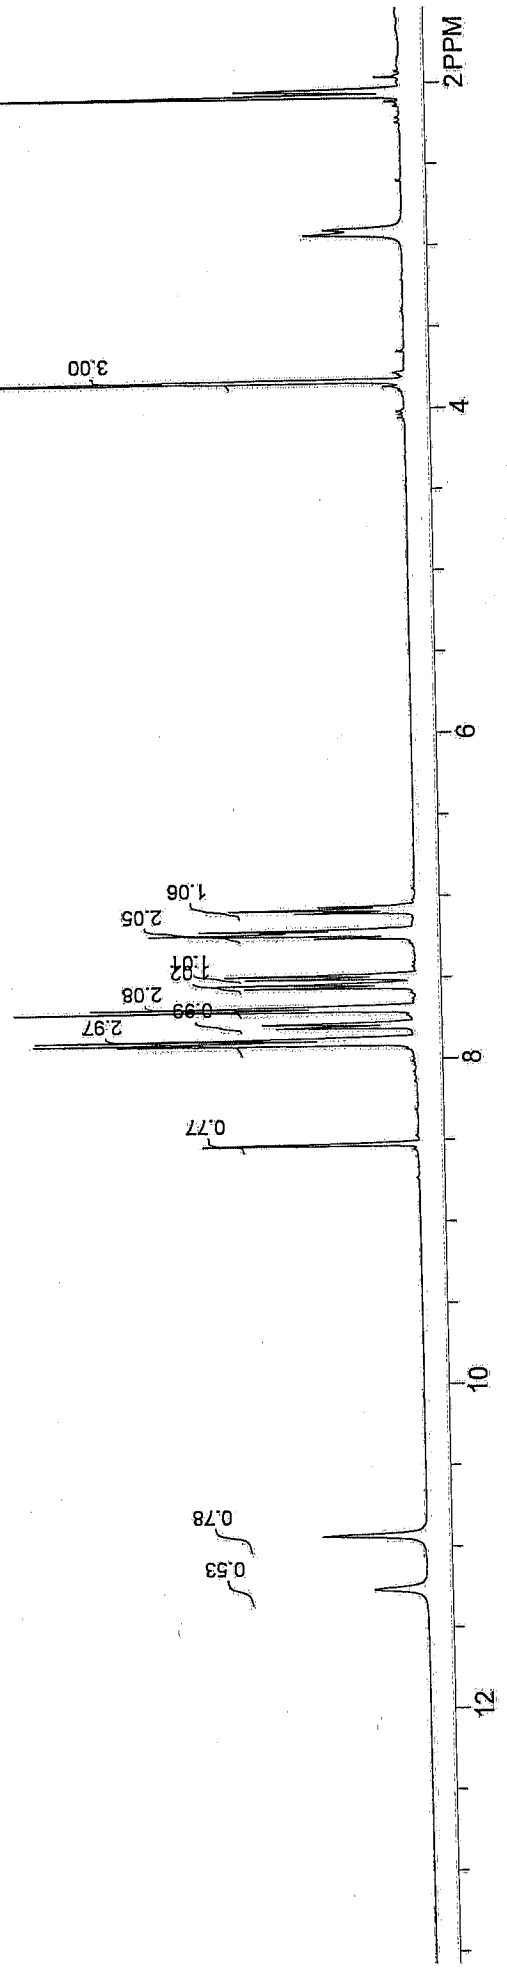



May 1 2011  
USER:  
SOLVENT: cdcl3  
Experiment = s2pul  
Pulse length = 11.663 usec  
Relaxation delay = 4.800 sec  
NA = 16  
Solvent = cdcl3  
FID PTS1d = 20006  
PTS1d = 32768  
F1 = 399.950684 MHz  
F2 = 100.575279 MHz  
SW1 = 8002.40 Hz  
AT1 = 2.50 sec  
Hz per Pt 1stD = 0.24 Hz  
SW2 = 1.00 Hz  
Hz per Pt 2ndD = 1.00 Hz  
O1 = 2006.7504 Hz  
O2 = -0.5000 Hz  
LB1 = 0.00 Hz  
TP A = -52.47  
B = -19.74  
C = 0.00

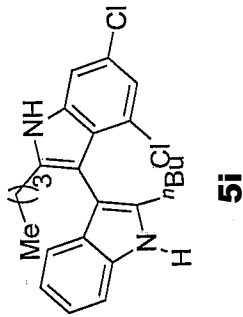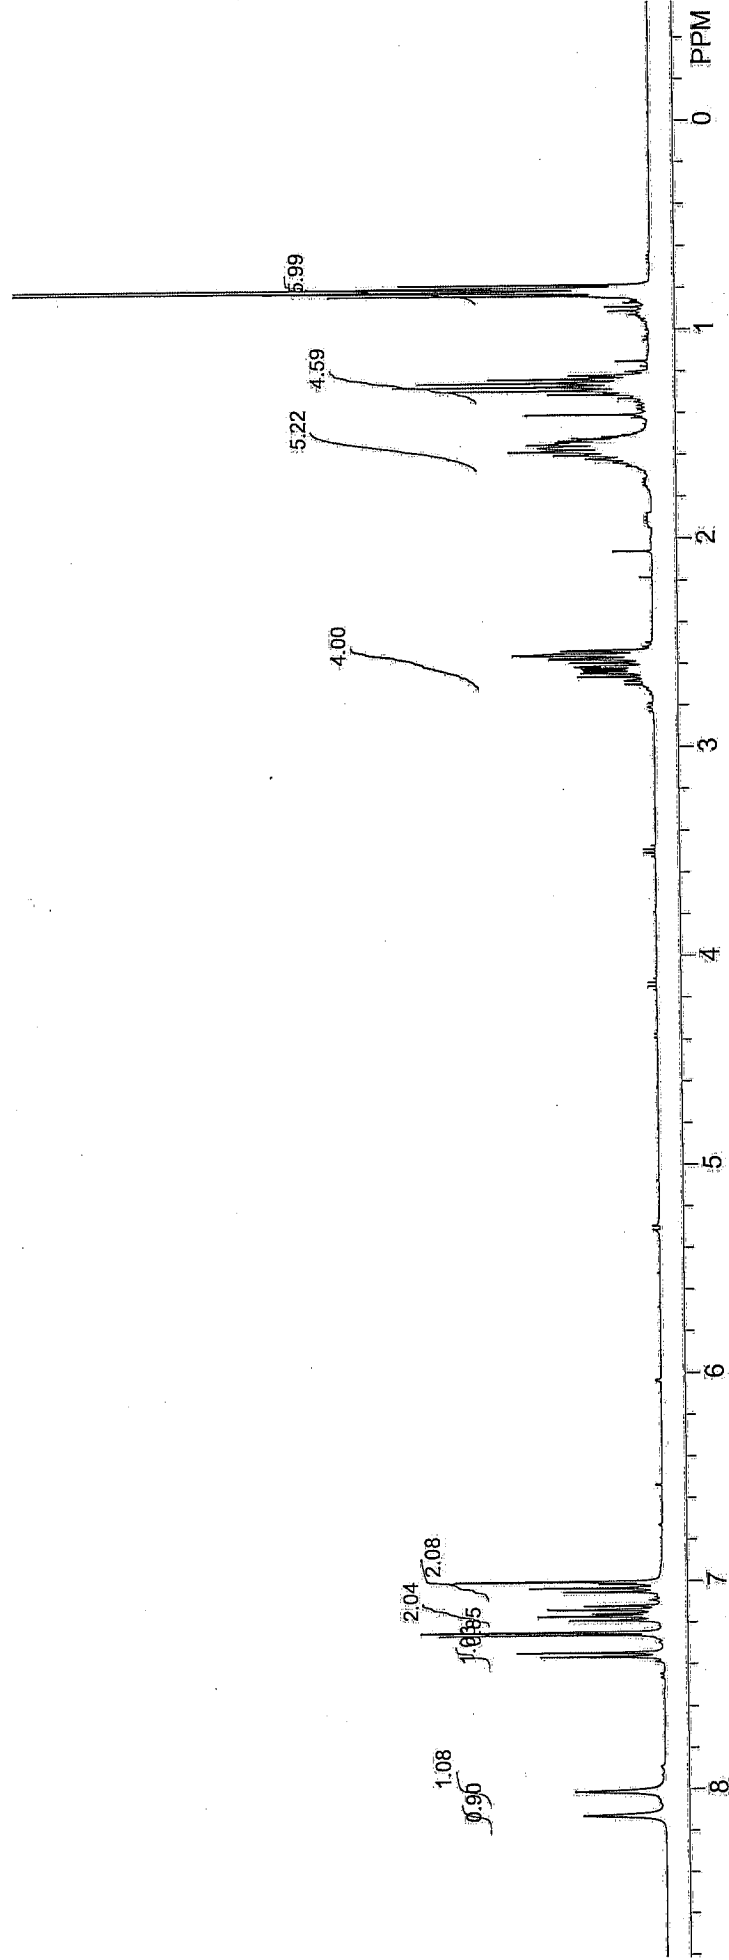



C:\Users\zhanglab1\Desktop\NMR\Ntus 20080731\DATA\yw-5-158-c1.fid

Standard c13 run using qnp probe

May 1 2011

USER:

SOLVENT: cdcl3

Experiment = s2pul

Pulse length = 7.775 usec

Relaxation delay = 1.300 sec

NA = 396

Solvent = cdcl3

FID PTS1d = 28040

PTS1d = 32768

F1 = 100.577232 MHz

F2 = 399.950684 MHz

SW1 = 28040.66 Hz

AT1 = 1.00 sec

Hz per Pt 1stD = 0.86 Hz

SW2 = 1.00 Hz

Hz per Pt 2ndD = 1.00 Hz

O1 = 10055.5039 Hz

O2 = -0.5000 Hz

LB1 = 2.00 Hz

TP A = -30.00

B = 8.44

C = 0.00

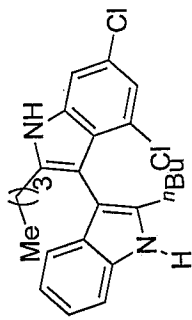

5i

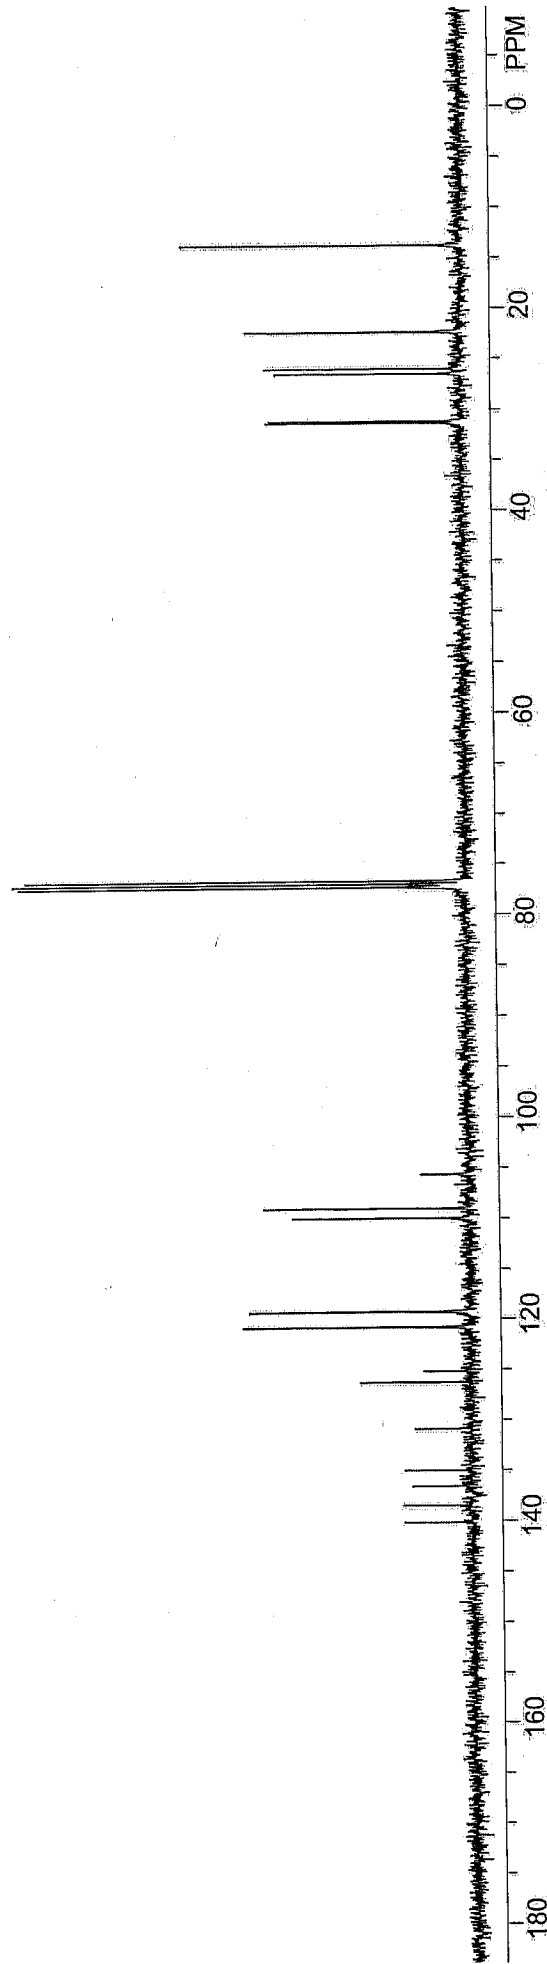

D:\Greenware\Nius 20080731\DATA\8wyz3-267-ppb-h1.fid  
new experiment  
May 1 2011

USER: ccd3  
SOLVENT: cdcl3  
Pulse length = 27.00  
Relaxation delay = 2.000 sec  
NA = 18  
Solvent = cdcl3  
FID P1S1d = 20006  
PTS1d = 32768  
F1 = 399.950684 MHz  
F2 = 100.575279 MHz  
SW1 = 8002.40 Hz  
AT1 = 2.50 sec  
Hz per P1S1d = 0.24 Hz  
SW2 = 100 Hz  
Hz per PTS1d = 1.00 Hz  
C2 = 2006.2462 Hz  
C3 = -0.5000 Hz  
LB1 = 0.00 Hz  
TP A = 43.81  
B = -49.66  
C = 0.00

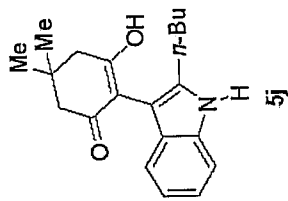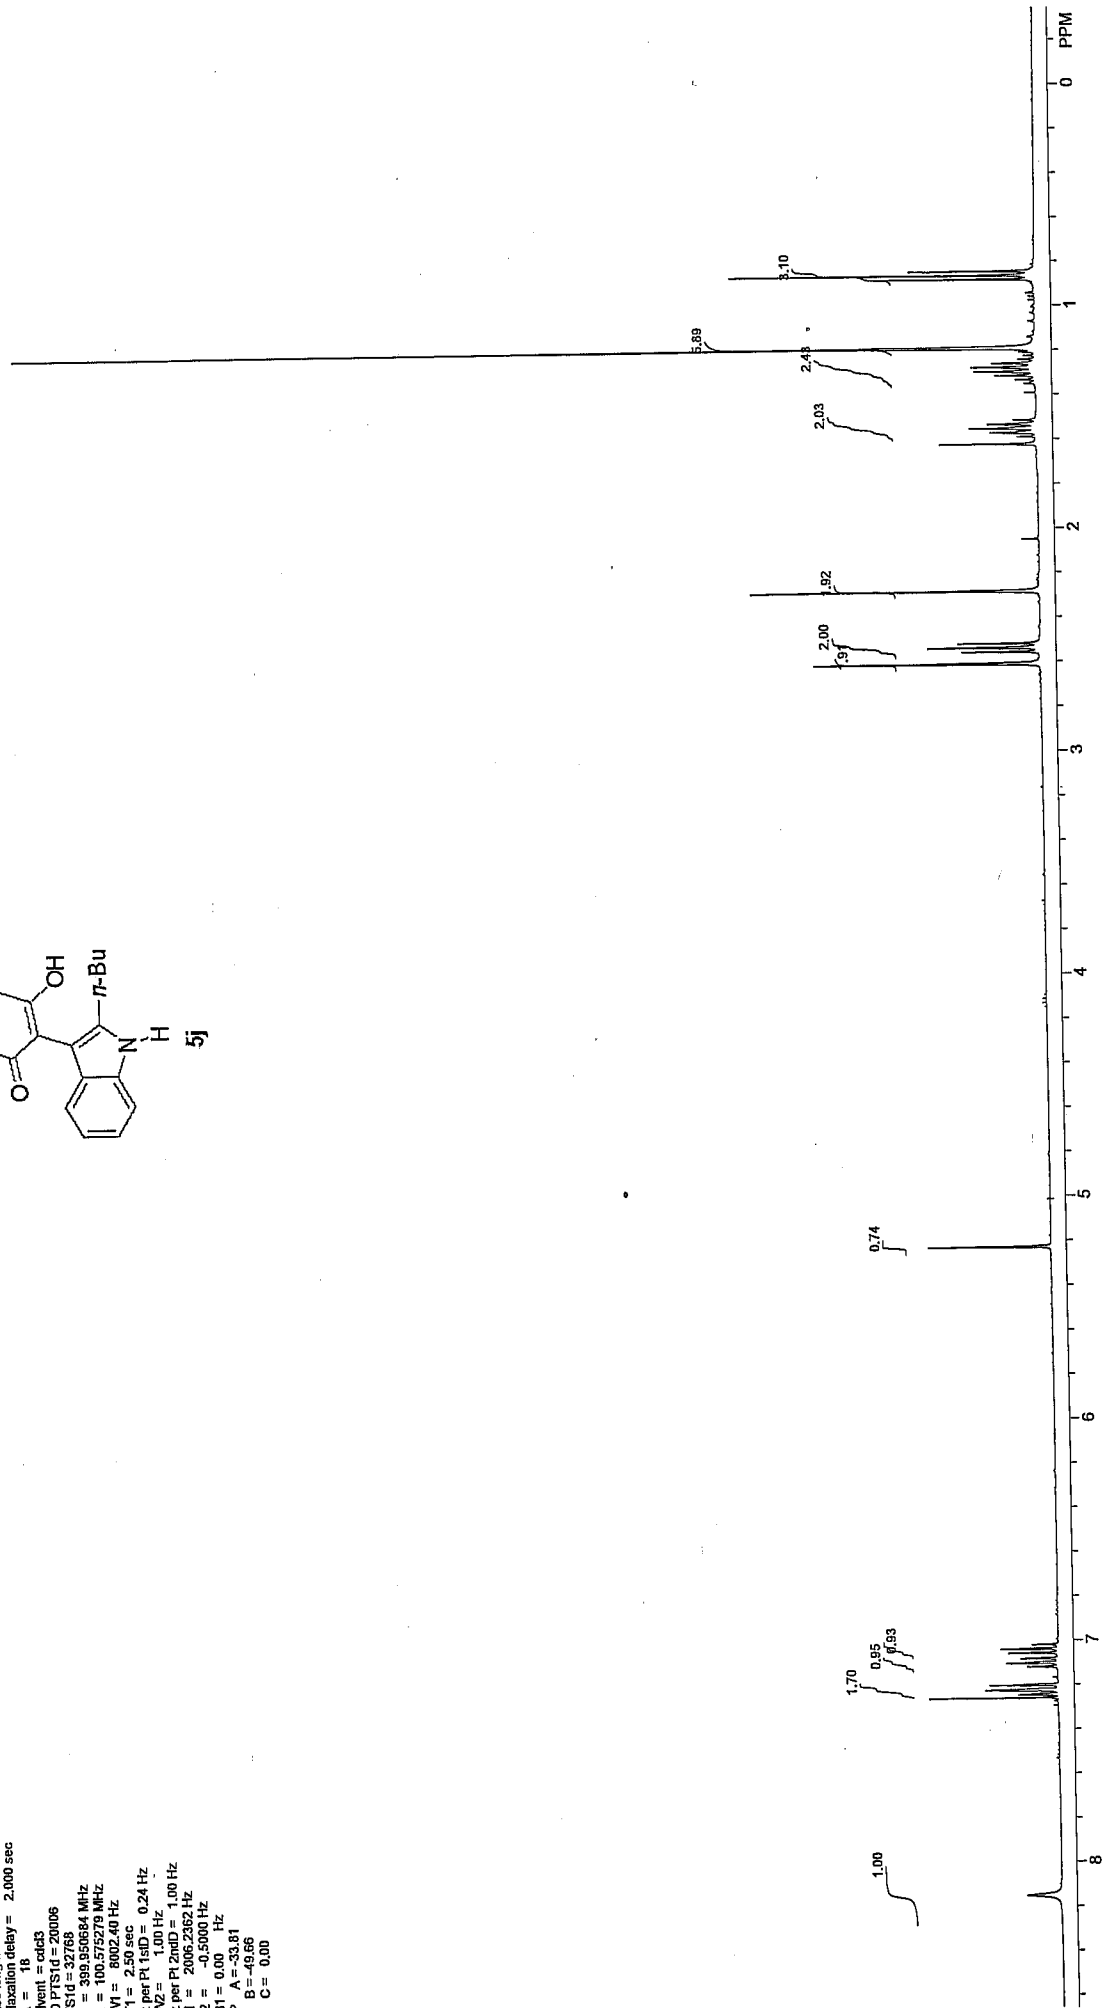

DIAG:recurveNitrz\_20080731\DATA\SVwz3-267-ppp-c13.fid  
Scan 1033 run using qnp probe  
May 1 2011

USER:  
SOLVENT: cdcl3  
Experiment = s2pvl  
Pulse length = 7.775 usec  
Relaxation delay = 1.300 sec  
NA = 460  
Solvent = cdcl3  
FID P1S1d = 28040  
PTS1d = 32768  
F1 = 100.577232 MHz  
P2 = 395.800664 MHz  
S1T1 = 1.00 sec  
Hz per P1 1s1d = 0.866 Hz  
S1P2 = 1.00 Hz  
Hz per P1 2nd1d = 1.00 Hz  
O1 = 10056.3604 Hz  
O2 = -0.5000 Hz  
LB1 = 2.00 Hz  
TP A = -19.69  
B = -15.47  
C = 0.00

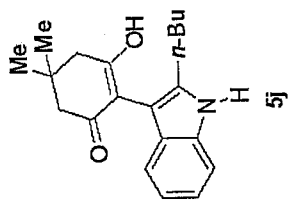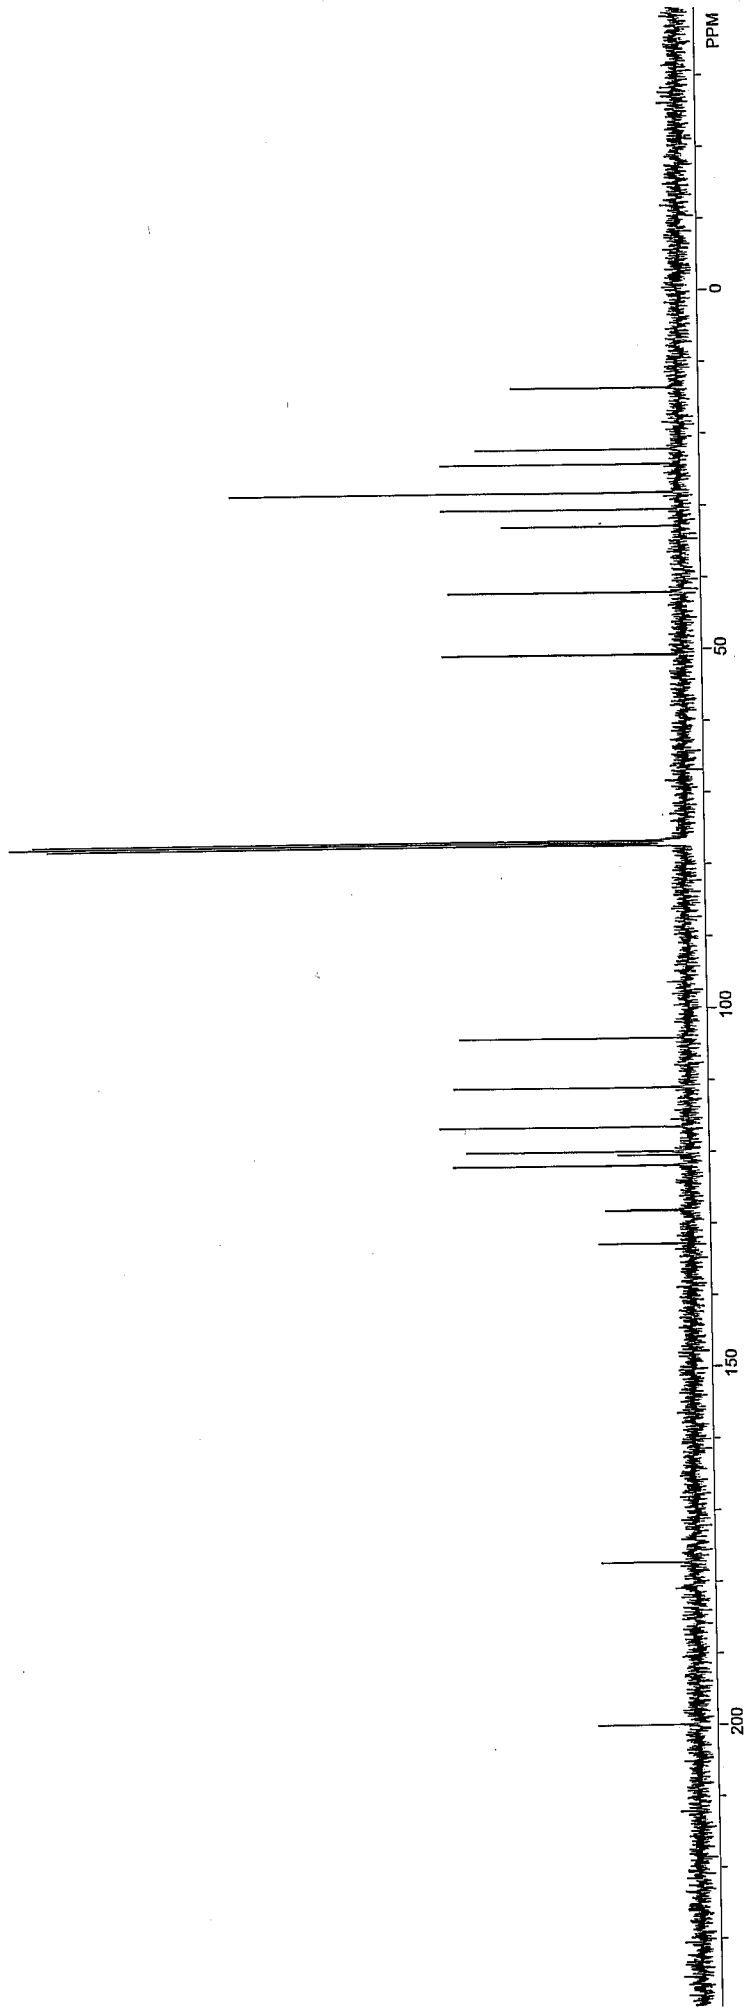

C:\Users\zhanglab1\Desktop\NMR\Nifus 20080731\DATA\1\$yiw-5-178-Ph-h.fid

new experiment

Apr 28 2011

USER:

SOLVENT: cdcl3

Experiment = s2pul

Pulse length = 11.663 usec

Relaxation delay = 4.800 sec

NA = 6

Solvent = cdcl3

FID PTS1d = 20006

PTS1d = 32768

F1 = 399.950684 MHz

F2 = 100.575279 MHz

SW1 = 8002.40 Hz

AT1 = 2.50 sec

Hz per Pt 1stD = 0.24 Hz

SW2 = 1.00 Hz

Hz per Pt 2ndD = 1.00 Hz

O1 = 2006.2362 Hz

O2 = -0.5000 Hz

LB1 = 0.00 Hz

TP A = -44.62

B = -33.90

C = 0.00

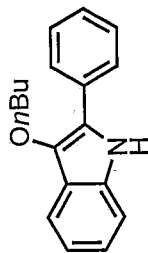

5k

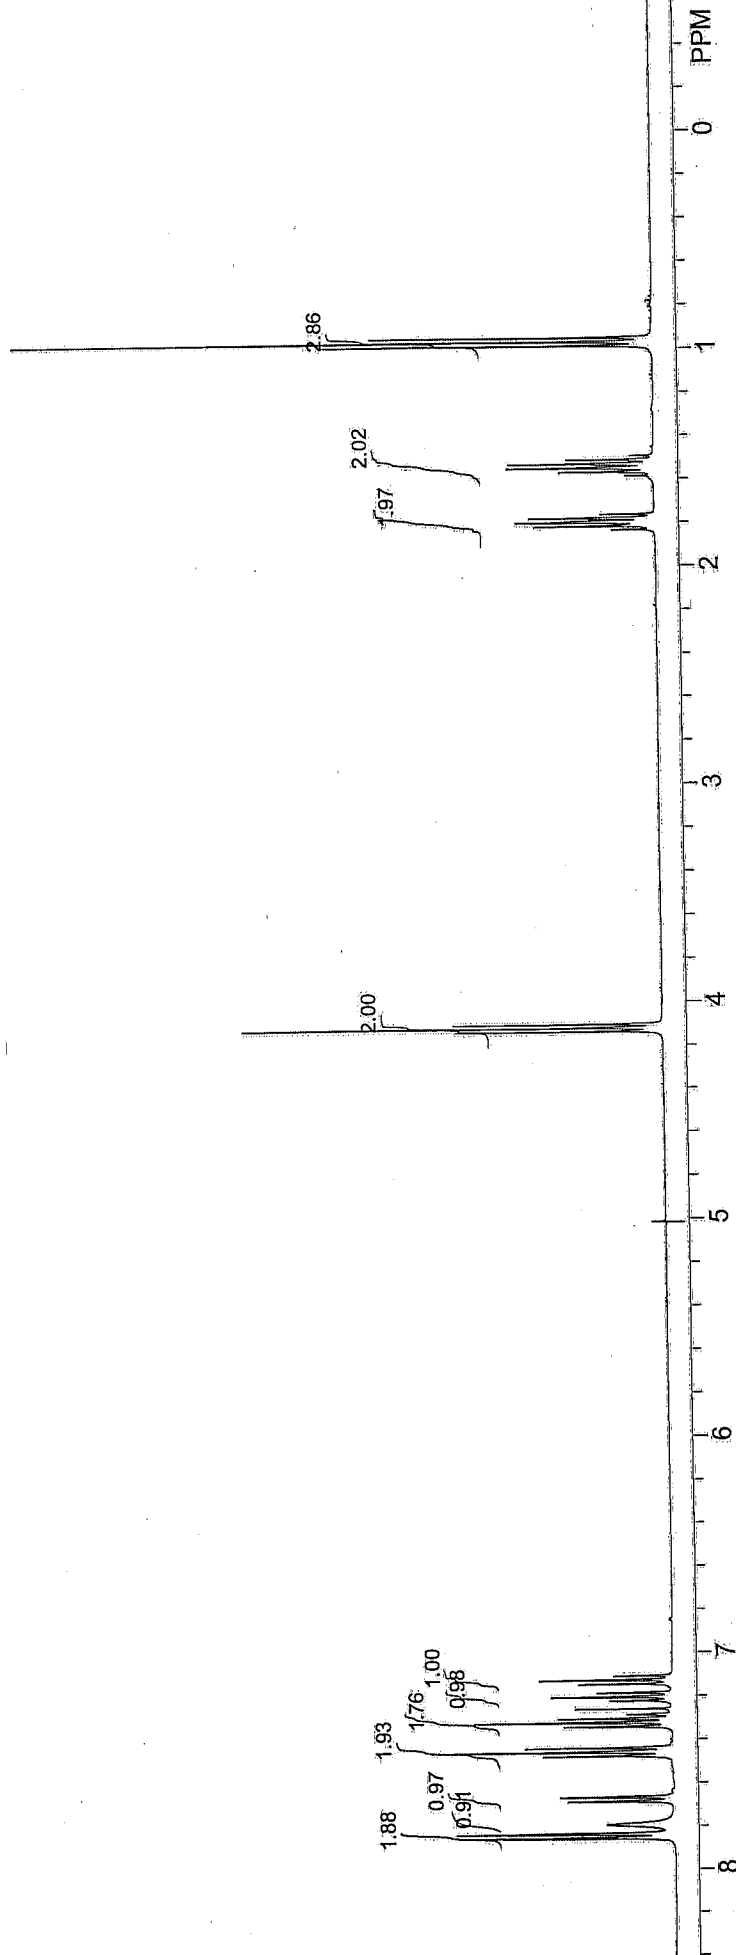

C:\Users\zhanglab1\Desktop\NMR\Nitus 20080731\DATA\5\jw-5-178-Ph-c3.fid  
Standard c13 run using qnp probe

Apr 28 2011

USER:

SOLVENT: cdcl3

Experiment = s2pul

Pulse length = 7.775 usec

Relaxation delay = 1.300 sec

NA = 264

Solvent = cdcl3

FID PTS1d = 28040

PTS1d = 32768

F1 = 100.577232 MHz

F2 = 399.950684 MHz

SW1 = 28040.66 Hz

AT1 = 1.00 sec

Hz per Pt 1stD = 0.86 Hz

SW2 = 1.00 Hz

Hz per Pt 2ndD = 1.00 Hz

O1 = 10054.6484 Hz

O2 = -0.5000 Hz

LB1 = 2.00 Hz

TP A = -30.94

B = 4.22

C = 0.00

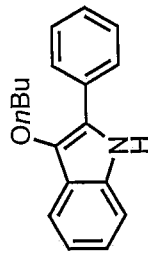

**5k**

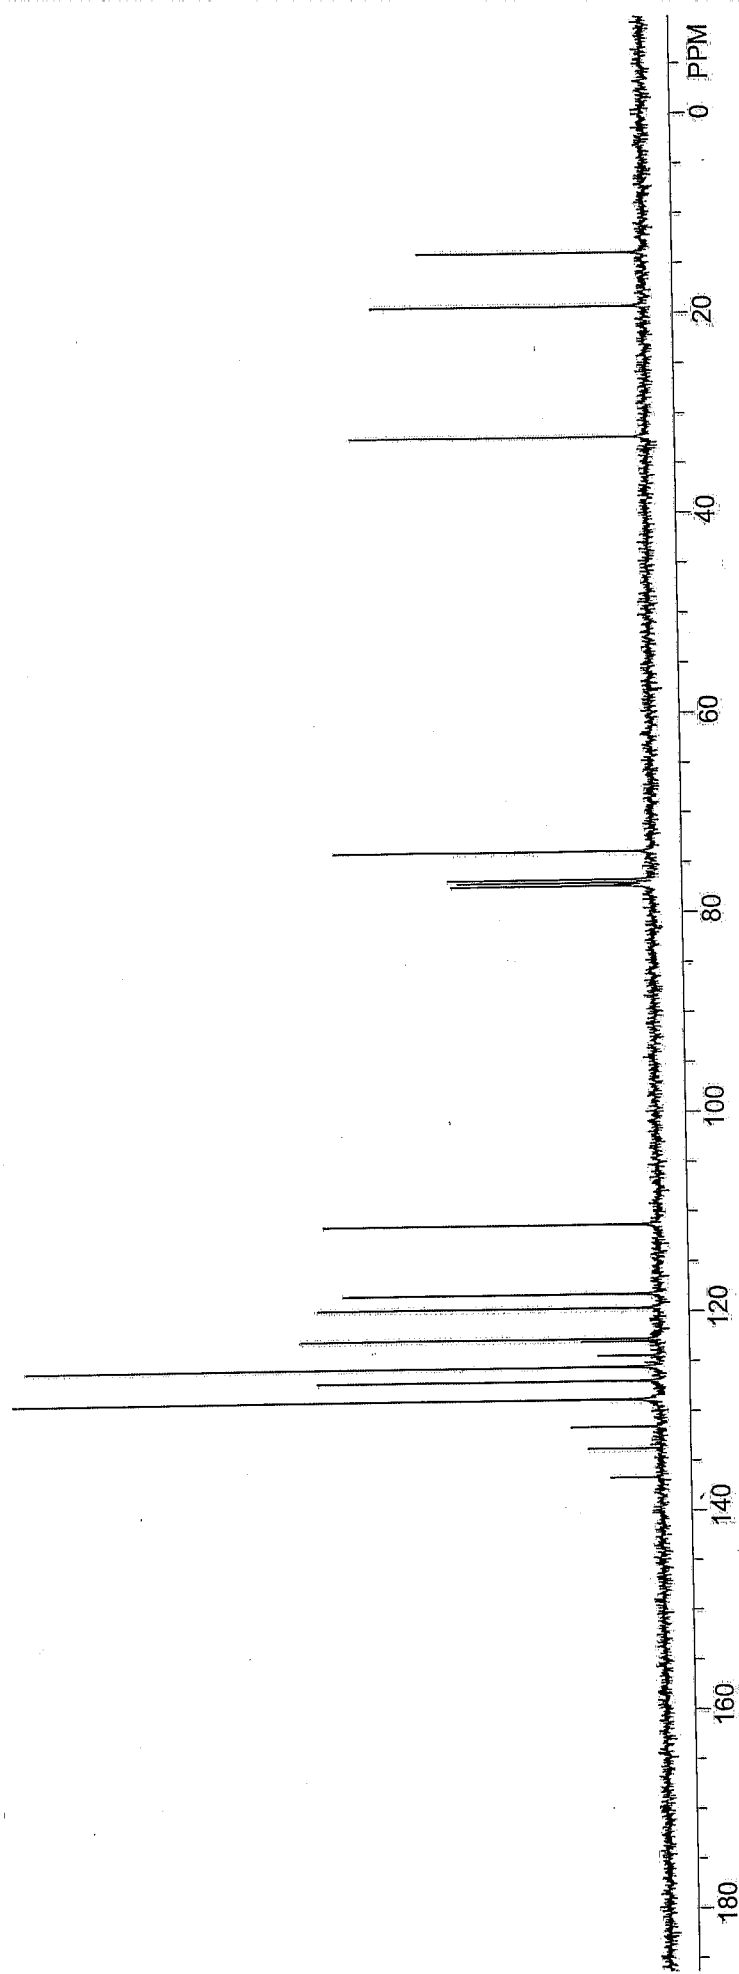

C:\Users\zhanglab1\Desktop\NMR\Nitus 20080731\DATA\syw-5-176-hthh.fid

Apr 27 2011

USER:

SOLVENT: cdcl3

Experiment = s2pul

Pulse length = 11.663 usec

Relaxation delay = 4.800 sec

NA = 6

Solvent = cdcl3

FID.PTS1d = 20006

PTS1d = 32768

F1 = 399.950684 MHz

F2 = 100.575279 MHz

SW1 = 8002.40 Hz

AT1 = 2.50 sec

Hz per Pt 1stD = 0.24 Hz

SW2 = 1.00 Hz

Hz per Pt 2ndD = 1.00 Hz

O1 = 2006.7504 Hz

O2 = -0.5000 Hz

LB1 = 0.00 Hz

TP A = -37.03

B = -48.52

C = 0.00

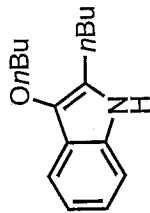

51

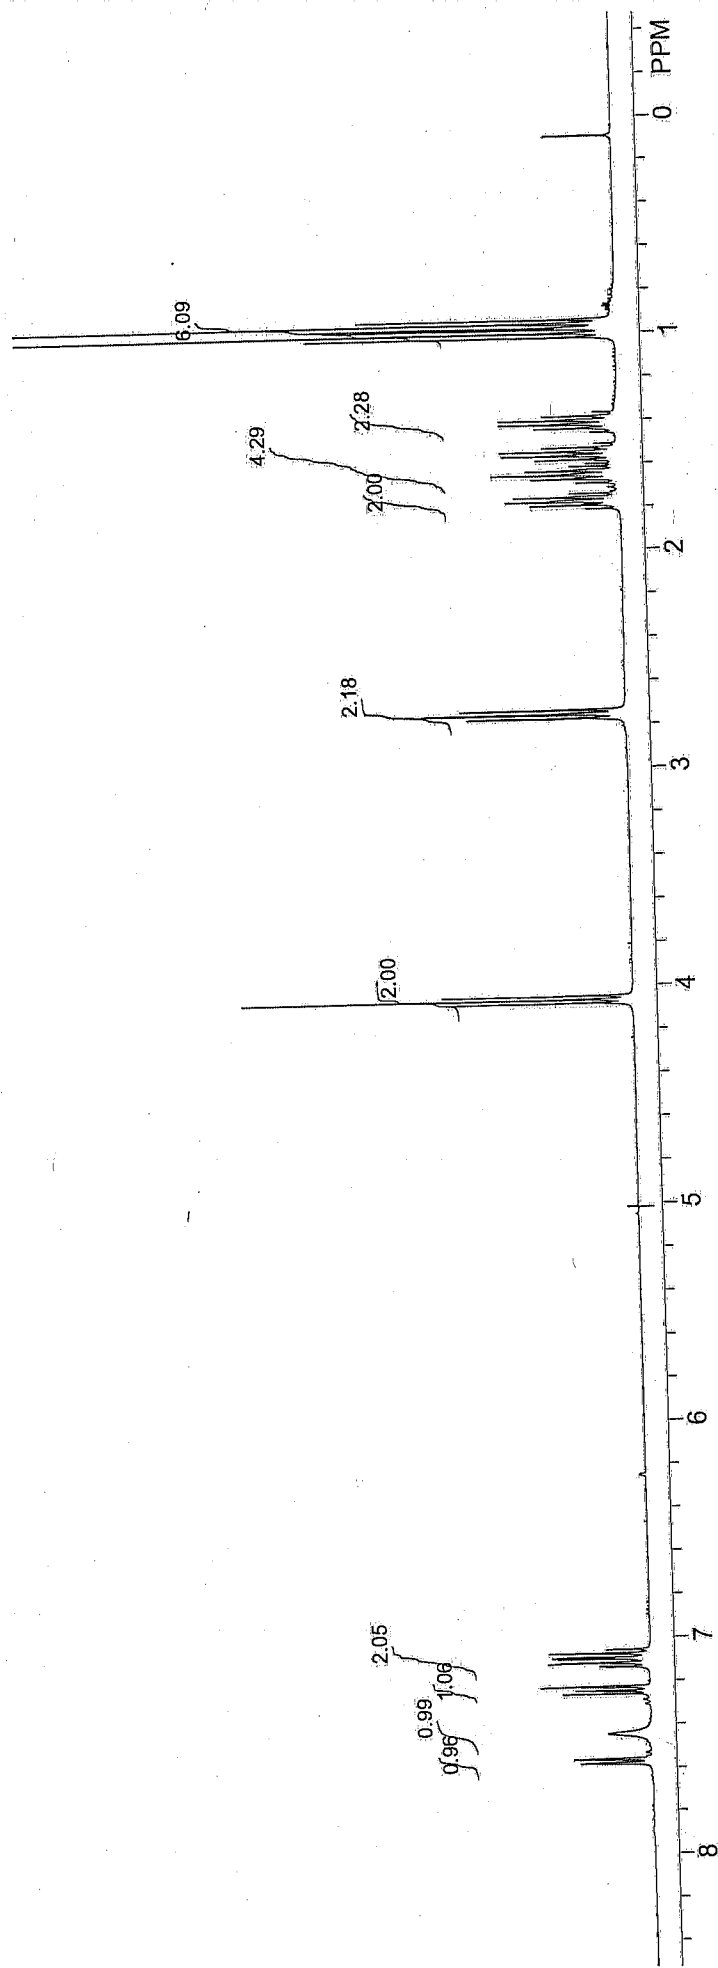

Apr 27 2011

USER:  
SOLVENT: cdcl3  
Experiment = s2pul  
Pulse length = 7.775 usec  
Relaxation delay = 1.300 sec  
NA = 76  
Solvent = cdcl3  
FID PTS1d = 28040  
PTS1d = 32768  
F1 = 100.577232 MHz  
F2 = 399.950684 MHz  
SW1 = 28040.66 Hz  
AT1 = 1.00 sec  
Hz per Pt 1stD = 0.86 Hz  
SW2 = 1.00 Hz  
Hz per Pt 2ndD = 1.00 Hz  
O1 = 10055.5059 Hz  
O2 = -0.5000 Hz  
LB1 = 2.00 Hz  
TP A = -30.47  
B = -2.81  
C = 0.00

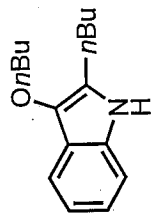

5I

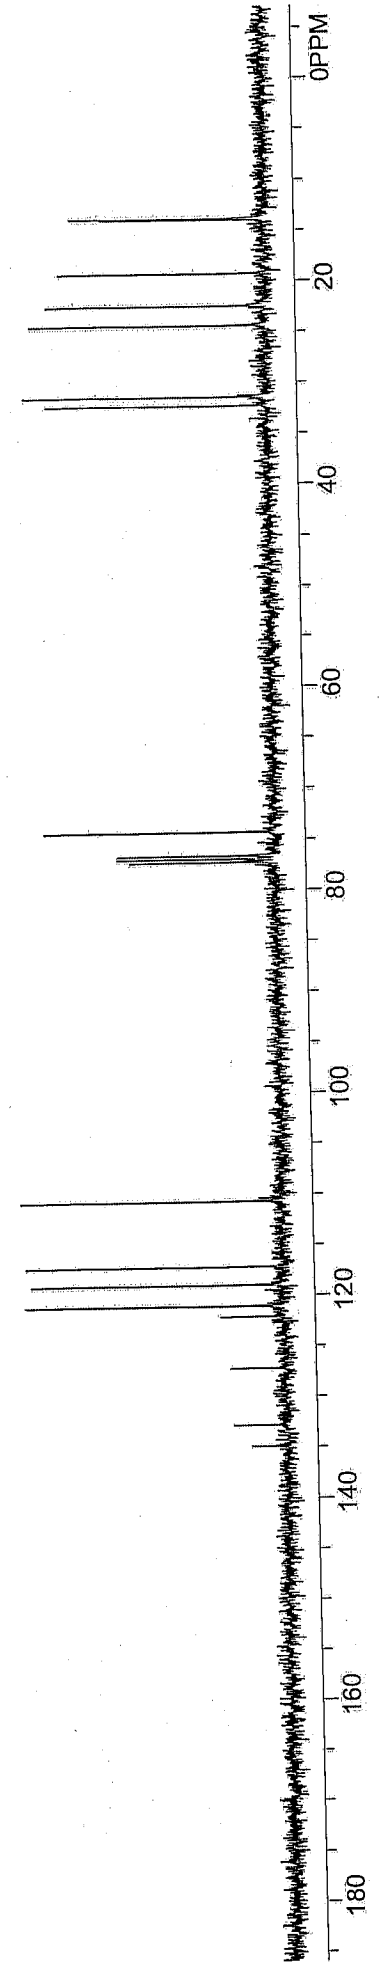

Apr 29 2011

USER:

SOLVENT: cdcl3

Experiment = s2pul

Pulse length = 11.663 usec

Relaxation delay = 4.800 sec

NA = 14

Solvent = cdcl3

FID PTS1d = 20006

PTS1d = 32768

F1 = 399.950684 MHz

F2 = 100.575279 MHz

SW1 = .800240 Hz

AT1 = 2.50 sec

Hz per Pt 1stD = 0.24 Hz

SW2 = 1.00 Hz

Hz per Pt 2ndD = 1.00 Hz

O1 = 2005.9918 Hz

O2 = -0.5000 Hz

LB1 = 0.00 Hz

TP A = -45.74

B = -34.27

C = 0.00

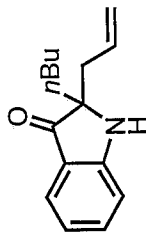

5m

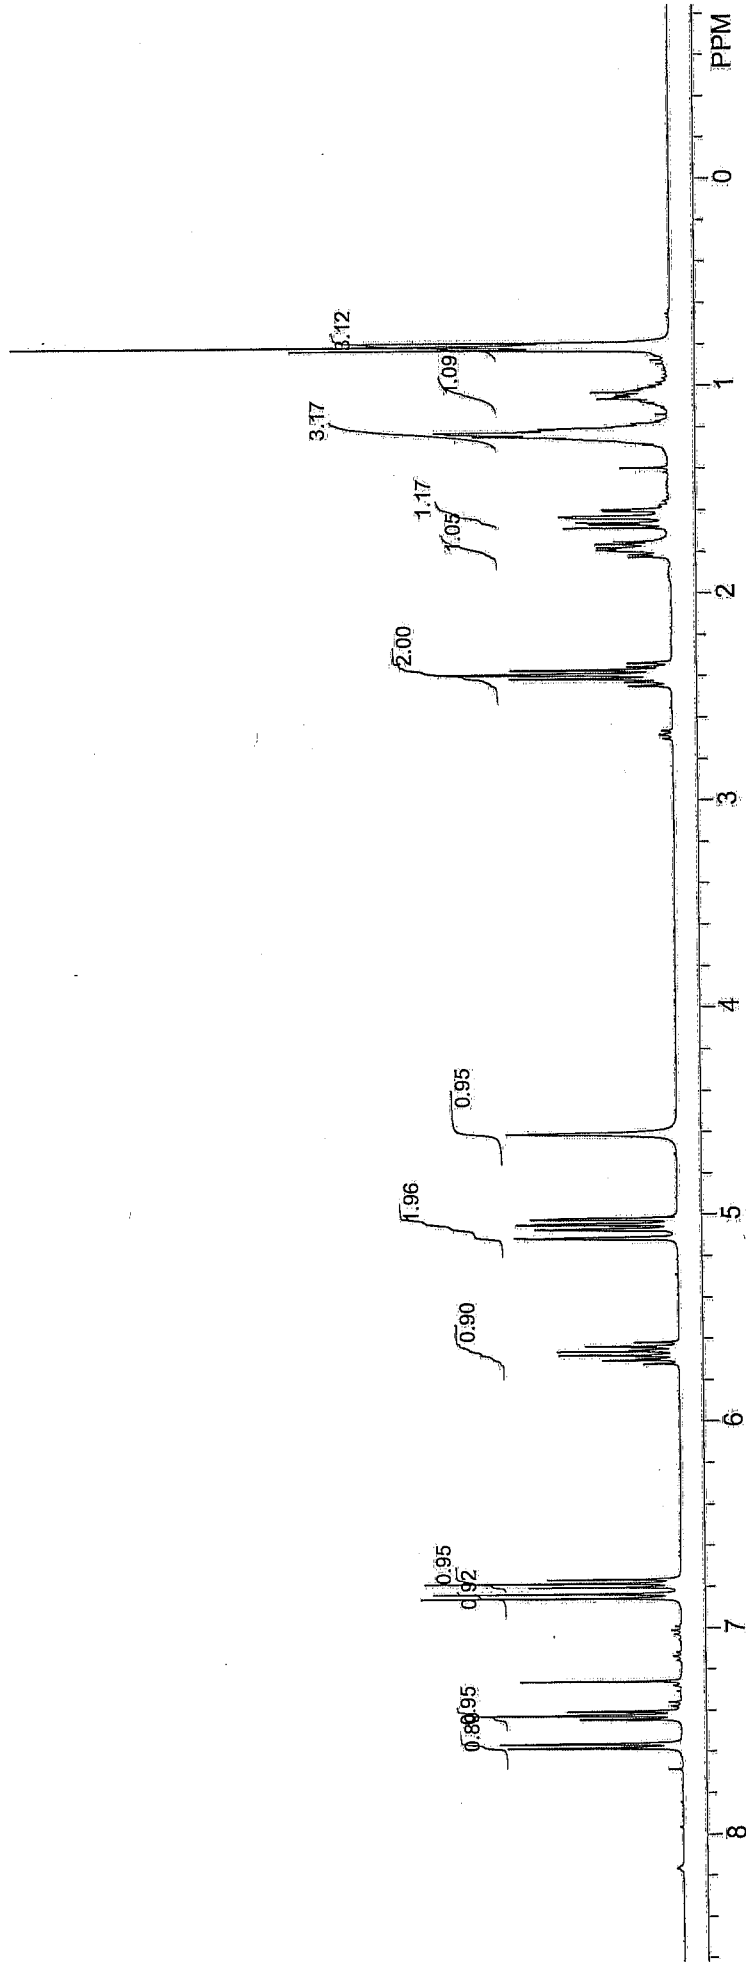



C:\Users\zhanglab1\Desktop\NMR\Nitus 20080731\DATA\15jw-5-184-c.fid  
Standard c13 run using qnp.probe  
Apr 29 2011

USER:

SOLVENT: cdcl3

Experiment = s2pul

Pulse length = 7.775 usec

Relaxation delay = 1.300 sec

NA = 68

Solvent = cdcl3

FID PTS1d = 28040

PTS1d = 32768

F1 = 100.577232 MHz

F2 = 399.950684 MHz

SW1 = 28040.66 Hz

AT1 = 1.00 sec

Hz per Pt 1stD = 0.86 Hz

SW2 = 1.00 Hz

Hz per Pt 2ndD = 1.00 Hz

O1 = 10055.5039 Hz

O2 = -0.5000 Hz

LB1 = 2.00 Hz

TP A = -40.78

B = 5.63

C = 0.00

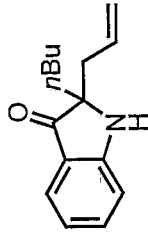

5m

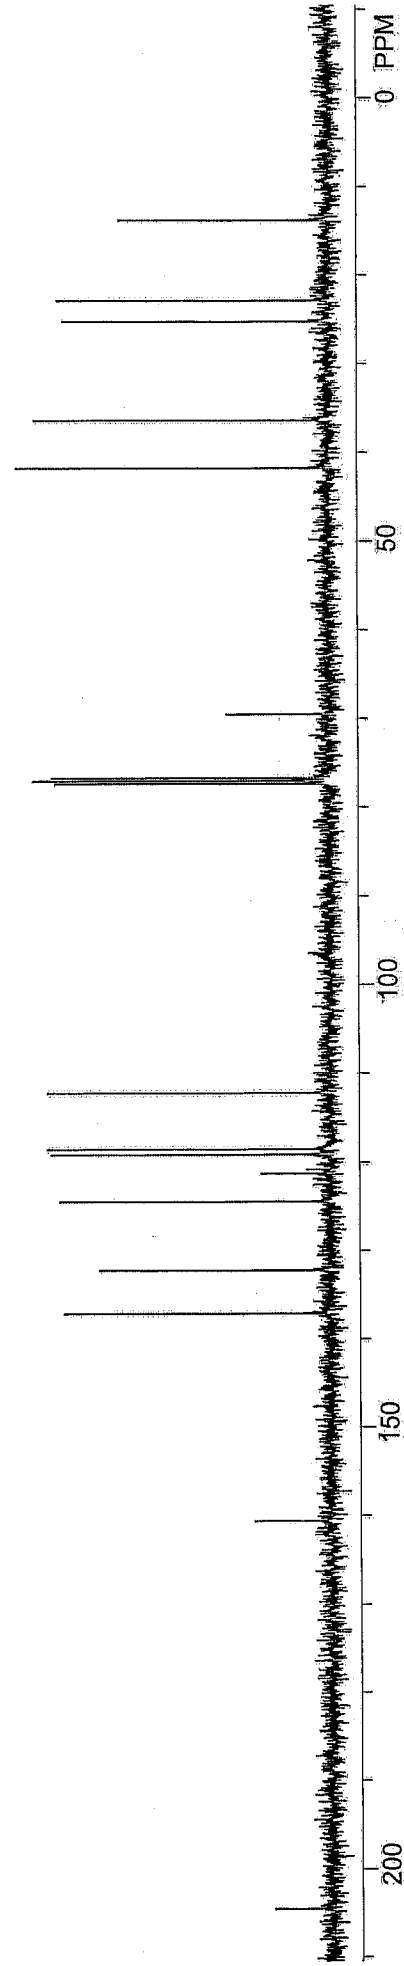

C:\Users\zhang\_laptop\Desktop\NMR\NMR\DATA\151z-1-150-1h.fid

new\_experimentU

Apr 26 2011

USER:

SOLVENT: cdc13

Experiment = s2pul

Pulse length = 11.663 usec

Relaxation delay = 4.800 sec

NA = 16

Solvent = cdc13

FID PTS1d = 20006

PTS1d = 32768

F1 = 399.950684 MHz

F2 = 100.575279 MHz

SW1 = 8002.40 Hz

AT1 = 2.50 sec

Hz per Pt 1stD = 0.24 Hz

SW2 = 1.00 Hz

Hz per Pt 2ndD = 1.00 Hz

O1 = 2006.7504 Hz

O2 = -0.5000 Hz

LB1 = 0.00 Hz

TP A = -55.78

B = -0.70

C = 0.00

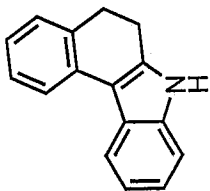

6

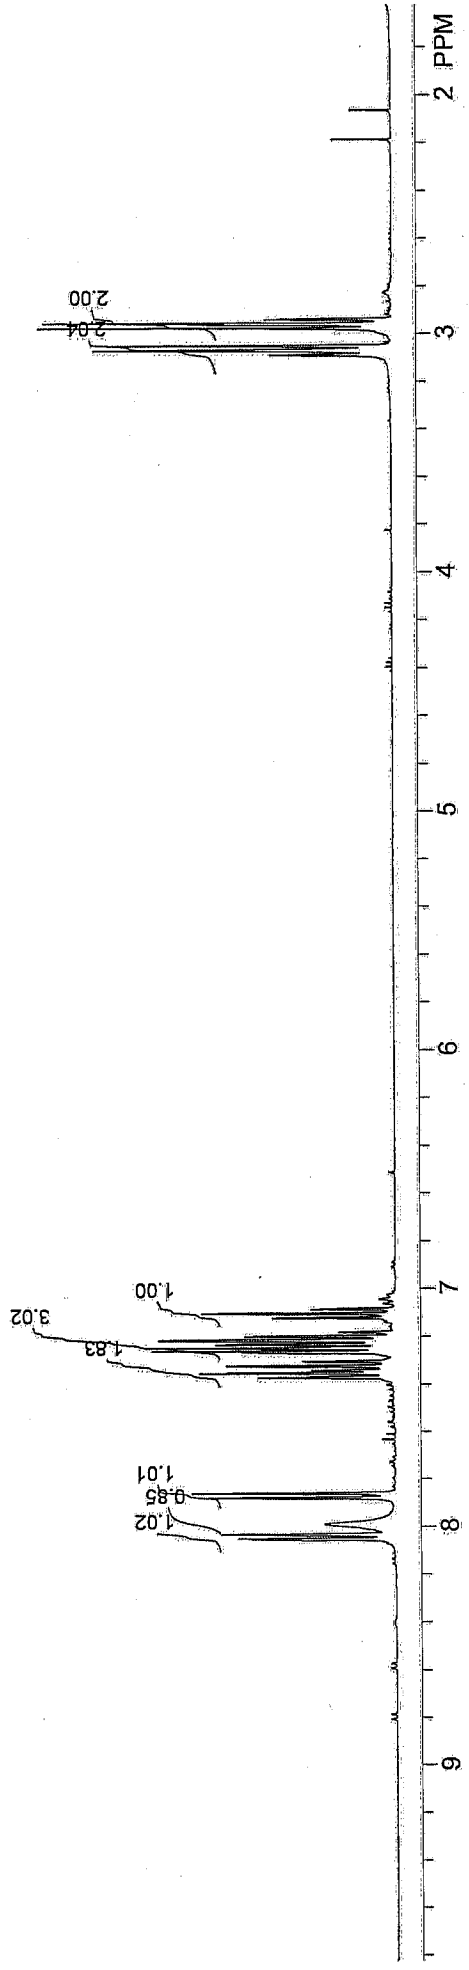

C:\Users\zhang\_laptop\Desktop\NMR\NMR\NMR\DATA\1z-1-150-137-2011-04-26  
Standard c13 run using app probeU  
Apr 26 2011  
USER:

SOLVENT: cddcl3  
Experiment = s2pul  
Pulse.length = 9.500 usec  
Relaxation delay = 5.000 sec  
NA = 352

Solvent = cddcl3  
FID.PTS1d = 16000  
PTS1d = 16384  
F1 = 100.576706 MHz  
F2 = 399.949585 MHz  
SW1 = 25000.00 Hz  
AT1 = 0.64 sec  
Hz.per Pt 1stD = 1.53 Hz  
SW2 = 1.00 Hz  
Hz.per Pt 2ndD = 1.00 Hz  
O1 = 9531.0605 Hz  
O2 = -0.5000 Hz  
LB1 = 2.00 Hz  
TP A = -126.09  
B = 174.38  
C = 0.00

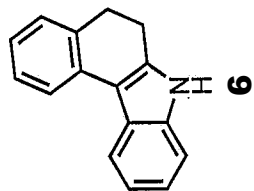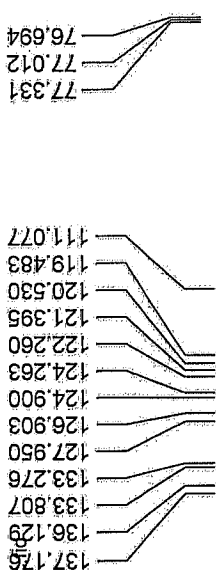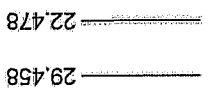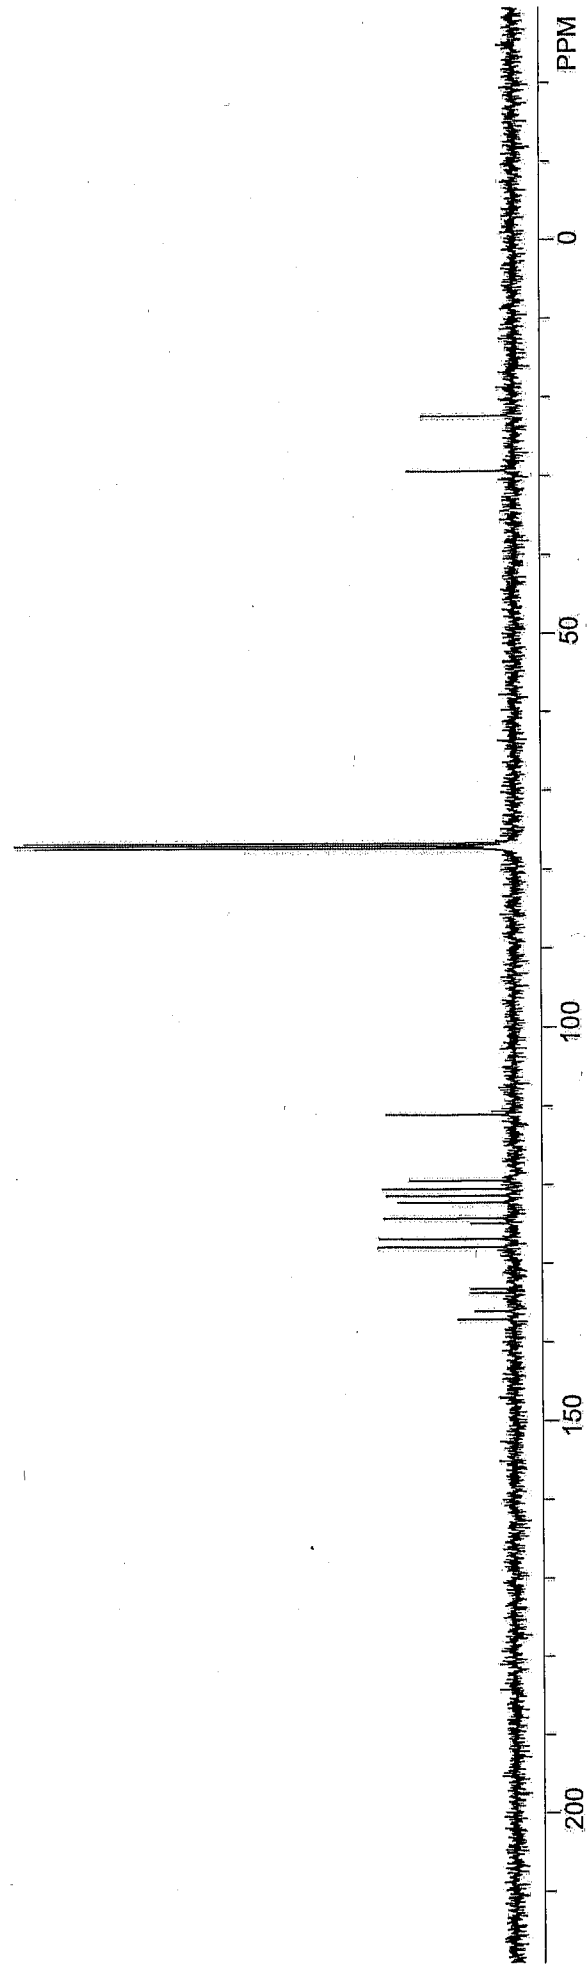

C:\Users\zhang laptop\Desktop\NMR\ntis\DATA\5\lz-1-145-1h.fid  
new\_experimentU

Apr. 25. 2011

USER:

SOLVENT: cdcl3

Experiment = s2pul

Pulse length = 11.663 usec

Relaxation delay = 4.800 sec

NA = 12

Solvent = cdcl3

FID PTS1d = 20006

PTS1d = 32768

F1 = 399.950684 MHz

F2 = 100.575279 MHz

SW1 = 8002.40 Hz

AT1 = 2.50 sec

Hz per Pt 1stD = 0.24 Hz

SW2 = 1.00 Hz

Hz per Pt 2ndD = 1.00 Hz

O1 = 2006.7504 Hz

O2 = -0.5000 Hz

LB1 = 0.00 Hz

TP A = 57.11

B = -16.77

C = 0.00

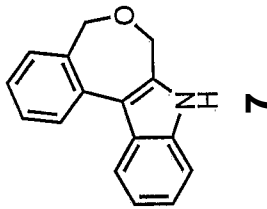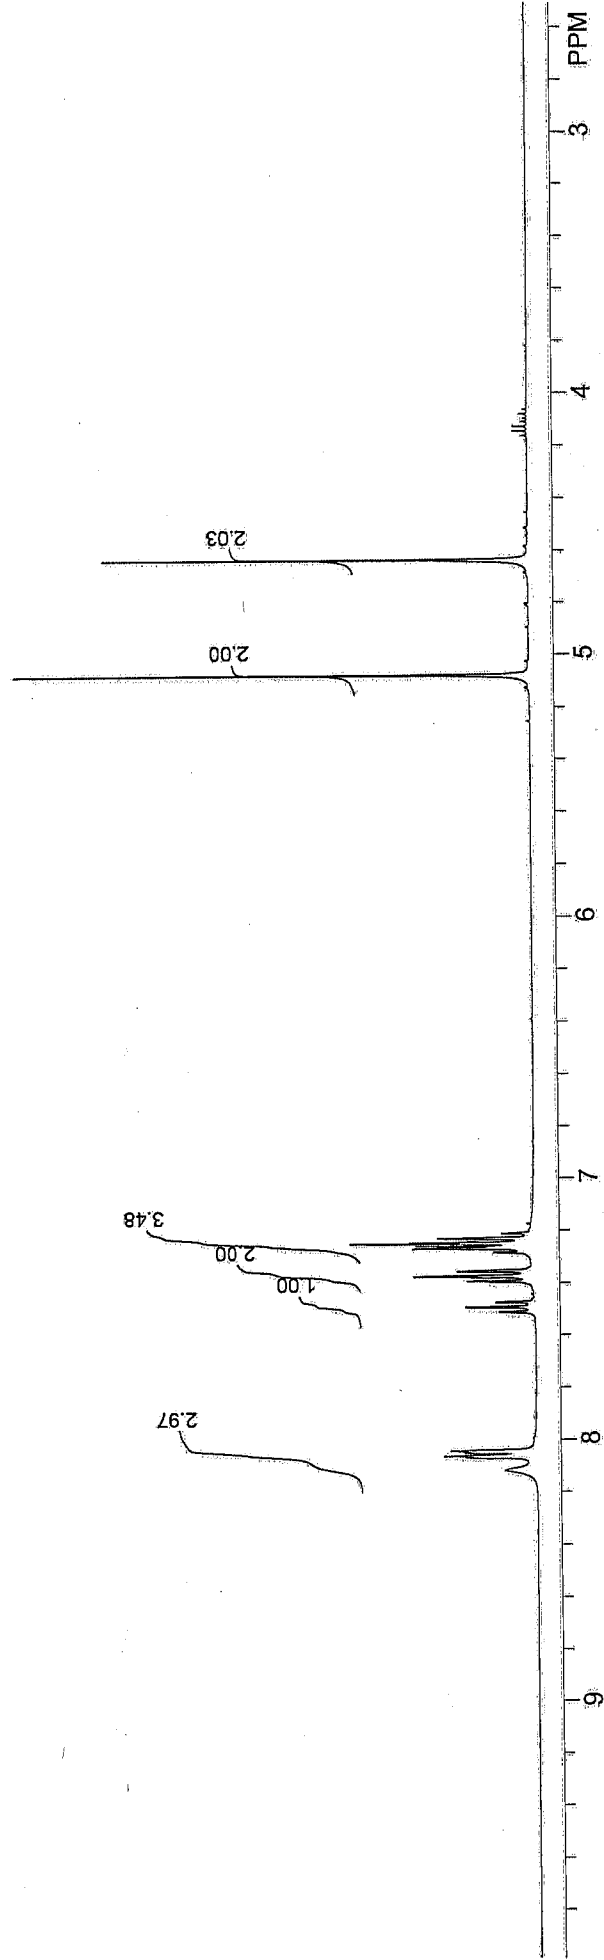

C:\Users\zhang\_laptop\Desktop\NMR\Nuts\DATA\5\lz-1-132-13c.fid

Std carbon; blank line7\_f1

May 1 2011

USER:

SOLVENT: CDCl3

Experiment = s2pul

Pulse length = 7.000 usec

Relaxation delay = 1.000 sec

NA = 136

Solvent = CDCl3

FID/PTS1d = 39295

PTS1d = 65536

F1 = 125.702103 MHz

F2 = 499.858551 MHz

SW1 = 30765.91 Hz

AT1 = 1.30 sec

Hz per Pt 1std = 0.46 Hz

SW2 = 1.00 Hz

Hz per Pt 2ncd = 1.00 Hz

O1 = 13197.3711 Hz

O2 = -0.5000 Hz

LB1 = 2.00 Hz

TP A = -185.16

B = 143.44

C = 0.00

137.501  
136.322  
135.084  
135.014  
129.114  
128.484  
127.305  
126.609  
125.371  
122.621  
120.625  
119.805  
113.385  
111.026

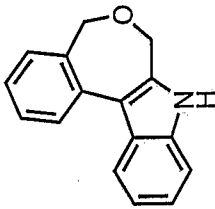

7

77.275  
77.019  
76.766  
71.423  
67.212

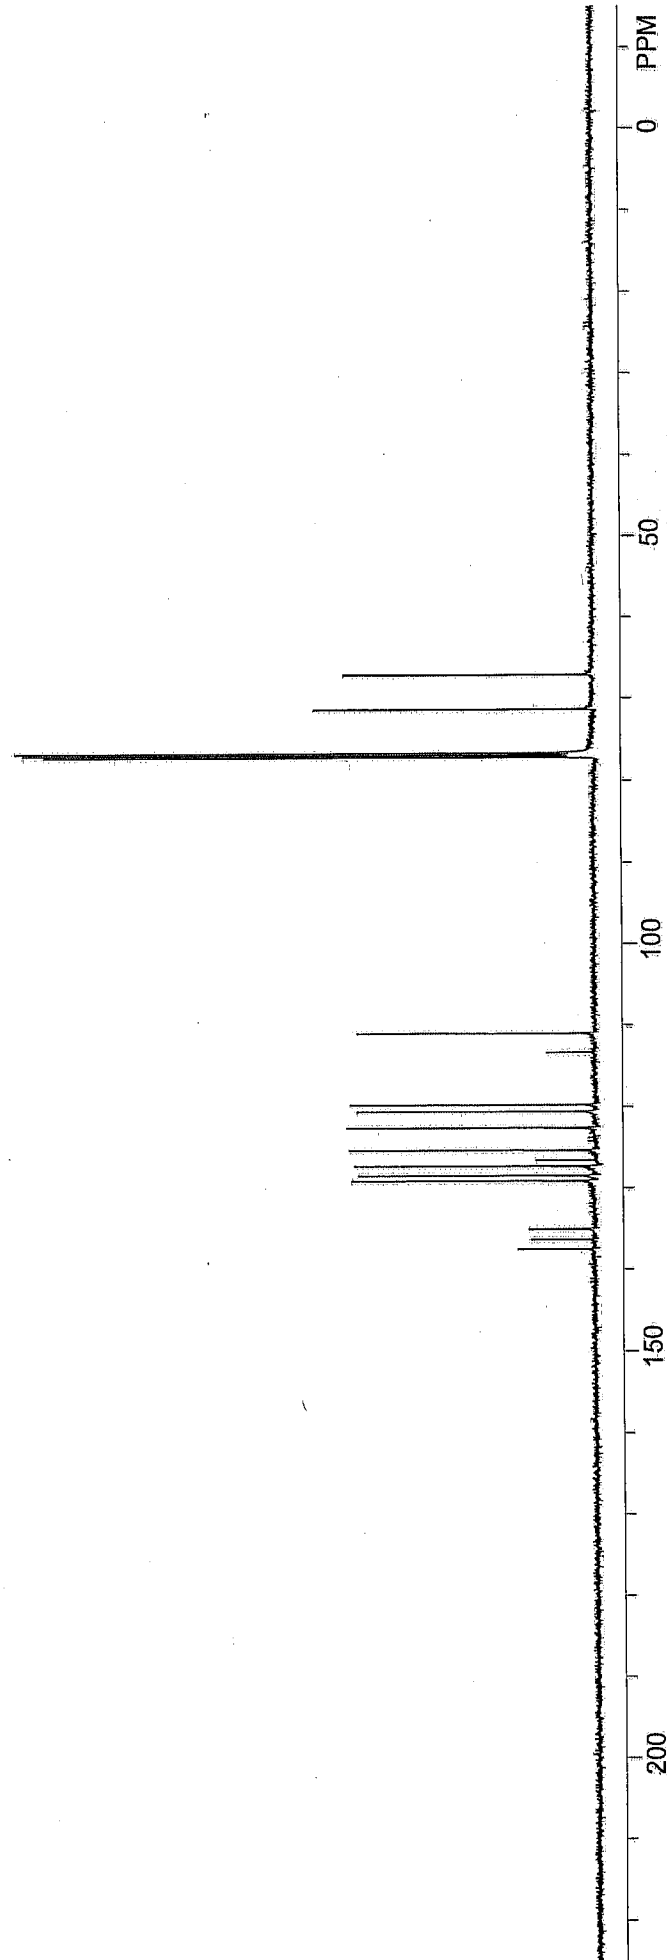

Supplement: NIHMS394032-supplement-SI.pdf [file NIHMS394032-supplement-SI.pdf]
